# Supplementary material for: Cognition-associated long noncoding RNAs are dysregulated upon severe COVID-19
Source: Front Immunol. 2024 Feb 12;15:1290523. doi: 10.3389/fimmu.2024.1290523 (PMC10894962; doi:10.3389/fimmu.2024.1290523)
Supplement: Supplementary file 2 [file Table_1.xlsx]

## Sheet: COVID vs Control Matched
ensembl_gene_id	baseMean	log2FoldChange	lfcSE	pvalue	padj	external_gene_name	entrezgene	gene_biotype
ENSG00000233123	110.164	-2.12658	0.399786	2.24071e-11	1.76937e-08	LINC01007	NA	lincRNA
ENSG00000280798	531.783	-0.542403	0.0858215	3.66413e-11	2.80294e-08	LINC00294	NA	lincRNA
ENSG00000226137	443.049	-0.77355	0.126432	5.14089e-11	3.31168e-08	BAIAP2-DT	NA	lincRNA
ENSG00000200087	267.784	1.46924	0.260017	7.27961e-11	4.01416e-08	SNORA73B	NA	snoRNA
ENSG00000231764	476.35	-1.94892	0.383645	2.52077e-10	9.20983e-08	DLX6-AS1	NA	antisense
ENSG00000212402	26.3265	1.88563	0.386946	2.9293e-09	6.46004e-07	SNORA74B	NA	snoRNA
ENSG00000223930	27.2349	-2.38747	0.566363	4.04024e-09	8.17365e-07	AC117453.1	NA	antisense
ENSG00000228999	22.374	-2.17585	0.482964	5.28909e-09	9.88332e-07	AC096570.1	NA	lincRNA
ENSG00000251448	7.1156	2.13234	0.472206	3.82995e-08	4.16682e-06	AC063919.1	NA	lincRNA
ENSG00000274266	153.707	1.03932	0.217055	4.07748e-08	4.41649e-06	SNORA73A	NA	snoRNA
ENSG00000271121	84.418	-0.882416	0.18359	4.90436e-08	5.19713e-06	NUDT4P2	NA	processed_pseudogene
ENSG00000282033	32.1726	-1.24761	0.271142	5.44959e-08	5.53529e-06	AC074387.1	NA	lincRNA
ENSG00000267506	148.082	-1.78174	0.423001	5.79765e-08	5.79462e-06	AC021683.2	NA	lincRNA
ENSG00000197536	140.482	0.627663	0.126324	7.03983e-08	6.52851e-06	C5orf56	441108	processed_transcript
ENSG00000273015	231.41	0.661228	0.137719	1.33627e-07	1.05518e-05	AC008124.1	NA	lincRNA
ENSG00000251442	26.4271	1.7638	0.419173	1.57392e-07	1.14326e-05	LINC01094	NA	lincRNA
ENSG00000262001	17.9602	1.49881	0.355847	1.96037e-07	1.3293e-05	DLGAP1-AS2	NA	antisense
ENSG00000229358	67.4139	0.537483	0.111292	2.09212e-07	1.38414e-05	DPY19L1P1	NA	unprocessed_pseudogene
ENSG00000286198	24.8358	-1.4662	0.359056	2.79655e-07	1.69029e-05	AL606753.2	NA	lincRNA
ENSG00000150175	44.1657	-1.34065	0.316785	3.05641e-07	1.79851e-05	FRMPD2B	NA	unprocessed_pseudogene
ENSG00000254186	14.1085	1.64825	0.399688	3.27393e-07	1.89911e-05	AC113414.1	NA	antisense
ENSG00000261325	21.3382	-1.78674	0.46837	3.42986e-07	1.95332e-05	LINC02192	NA	lincRNA
ENSG00000274020	114.237	0.467873	0.0975787	3.50556e-07	1.9864e-05	LINC01138	NA	processed_transcript
ENSG00000251022	255.56	0.553122	0.119371	3.79338e-07	2.10818e-05	THAP9-AS1	NA	antisense
ENSG00000231013	6.26428	-2.27063	0.614996	4.66101e-07	2.42244e-05	AC013275.1	NA	antisense
ENSG00000274021	22.1398	-1.13073	0.26371	4.71992e-07	2.44268e-05	AC024909.1	NA	antisense
ENSG00000285972	13.9066	0.922588	0.204481	4.87467e-07	2.50161e-05	CERNA2	NA	lincRNA
ENSG00000196299	20.7751	2.83414	1.10045	8.23787e-07	3.67307e-05	ZNRD1ASP	NA	processed_transcript
ENSG00000232903	9.99486	-1.81491	0.490157	8.39991e-07	3.71158e-05	LINC01166	NA	lincRNA
ENSG00000256982	24.9741	-1.19536	0.293682	1.01592e-06	4.26563e-05	AC135782.1	NA	lincRNA
ENSG00000232599	14.5802	-1.21923	0.302524	1.1853e-06	4.82776e-05	AL008707.1	NA	processed_pseudogene
ENSG00000285883	24.7468	-1.14684	0.283911	1.25789e-06	5.05615e-05	AC123784.1	NA	lincRNA
ENSG00000212743	43.4791	1.19502	0.307862	1.51222e-06	5.80214e-05	LINC02656	NA	lincRNA
ENSG00000213753	864.214	-0.406664	0.0898805	1.79225e-06	6.63727e-05	CENPBD1P1	NA	transcribed_processed_pseudogene
ENSG00000253671	11.6406	1.29556	0.326407	1.98269e-06	7.1374e-05	AC027117.1	NA	processed_transcript
ENSG00000274917	111.661	1.66415	0.474056	2.23273e-06	7.7525e-05	RNA5-8SN5	NA	rRNA
ENSG00000223509	144.31	0.590562	0.138956	2.40817e-06	8.19884e-05	AC135983.2	NA	transcribed_processed_pseudogene
ENSG00000225470	390.818	0.58985	0.140368	2.76066e-06	9.04663e-05	JPX	NA	lincRNA
ENSG00000203739	19.6687	0.884265	0.218647	2.90775e-06	9.36564e-05	AL645568.1	NA	antisense
ENSG00000252481	208.738	0.554114	0.1309	3.06176e-06	9.77169e-05	SCARNA13	NA	scaRNA
ENSG00000259319	81.6436	-1.05995	0.286098	3.14057e-06	9.94886e-05	AF111167.2	NA	antisense
ENSG00000270681	6.70792	1.31422	0.340826	3.25346e-06	0.000102236	AC095055.1	NA	antisense
ENSG00000225684	19.6392	2.31719	0.796359	3.61445e-06	0.000111293	FAM225B	NA	lincRNA
ENSG00000225465	856.15	-0.877988	0.234741	4.25898e-06	0.000125103	RFPL1S	NA	antisense
ENSG00000272779	85.0801	-0.435597	0.10212	4.55092e-06	0.000131525	AC245060.4	NA	transcribed_unprocessed_pseudogene
ENSG00000281388	134.591	0.672466	0.167891	4.69756e-06	0.000134023	SCARNA6	NA	scaRNA
ENSG00000272888	527.751	0.426274	0.0998572	4.72317e-06	0.000134597	LINC01578	NA	processed_transcript
ENSG00000224660	79.4957	0.598047	0.146708	5.82786e-06	0.000156083	SH3BP5-AS1	NA	antisense
ENSG00000254187	20.4517	-0.96052	0.25646	5.88303e-06	0.000156834	AC008708.2	NA	antisense
ENSG00000270055	72.1652	0.551881	0.134743	6.11034e-06	0.000159292	AC127502.2	NA	sense_intronic
ENSG00000256008	15.8142	-1.96533	0.716846	6.16761e-06	0.000160208	AC125616.1	NA	antisense
ENSG00000276849	18.655	-1.38058	0.414201	6.28967e-06	0.000161898	TRBC2	NA	TR_C_gene
ENSG00000279400	751.897	1.04252	0.29973	6.78031e-06	0.000171743	AC008957.3	NA	TEC
ENSG00000254634	80.1692	0.836532	0.218356	6.88122e-06	0.000174014	SMG1P6	NA	unprocessed_pseudogene
ENSG00000246363	23.0914	-1.40155	0.425474	7.0073e-06	0.000176111	LINC02458	NA	lincRNA
ENSG00000233937	32.0034	0.850035	0.222579	7.18353e-06	0.000179251	AC008443.1	NA	processed_transcript
ENSG00000250903	124.498	0.520295	0.127223	7.47759e-06	0.000184313	GMDS-DT	NA	lincRNA
ENSG00000251423	9.71228	-1.40117	0.410111	8.02709e-06	0.000194165	AC016576.1	NA	antisense
ENSG00000168405	90.8832	0.73206	0.191408	8.05598e-06	0.000194672	CMAHP	NA	transcribed_unitary_pseudogene
ENSG00000237250	2.96944	-2.7507	0.815194	8.5822e-06	0.00020456	AL359924.1	NA	antisense
ENSG00000249740	4.26874	2.30605	0.820194	1.16061e-05	0.000256539	OSMR-AS1	NA	lincRNA
ENSG00000267272	55.5585	-1.23011	0.395492	1.16118e-05	0.000256539	LINC01140	NA	lincRNA
ENSG00000260645	18.4643	0.84848	0.228321	1.1668e-05	0.000257187	AL359715.2	NA	lincRNA
ENSG00000220575	98.7934	-1.01992	0.301284	1.22021e-05	0.000265743	HTR5A-AS1	NA	antisense
ENSG00000265313	36.6621	-2.02635	0.875772	1.30678e-05	0.000280356	LINC01476	NA	lincRNA
ENSG00000226015	5.27652	1.47277	0.431245	1.32577e-05	0.000283933	CCT8P1	NA	processed_pseudogene
ENSG00000239665	292.539	0.374644	0.0921255	1.47349e-05	0.000304899	AL157392.3	NA	processed_transcript
ENSG00000271614	100.108	-0.729243	0.201143	1.57782e-05	0.000320261	ATP2B1-AS1	NA	lincRNA
ENSG00000267082	3.53139	-1.50352	0.431698	1.61712e-05	0.000326074	AC011472.1	NA	antisense
ENSG00000249550	10.3347	-1.73449	0.608862	1.80388e-05	0.000354108	LINC01234	NA	lincRNA
ENSG00000267414	8.99472	-1.00703	0.28668	1.86629e-05	0.000362867	AC120049.1	NA	lincRNA
ENSG00000258736	3.22438	-1.93066	0.61872	1.95423e-05	0.000374315	AL583722.3	NA	lincRNA
ENSG00000278727	37.0833	-1.05678	0.32769	1.97977e-05	0.000378616	AC000403.1	NA	lincRNA
ENSG00000212232	276.756	0.763662	0.219059	2.03507e-05	0.000386474	SNORD17	NA	snoRNA
ENSG00000278925	7.54513	1.28242	0.376306	2.14089e-05	0.000400664	AC005753.1	NA	lincRNA
ENSG00000231064	47.7897	0.697749	0.192201	2.21972e-05	0.000412265	AC234582.1	NA	antisense
ENSG00000227782	7.05315	1.09503	0.314072	2.23835e-05	0.000415409	AC002553.1	NA	antisense
ENSG00000198711	2.41328	2.75627	0.927085	2.348e-05	0.000429504	SSBP3-AS1	NA	antisense
ENSG00000267890	14.5896	-0.902571	0.260029	2.34938e-05	0.000429504	AC010624.2	NA	lincRNA
ENSG00000248508	39.4384	0.934115	0.28043	2.39472e-05	0.000435503	SRP14-AS1	NA	bidirectional_promoter_lncRNA
ENSG00000232994	4.88606	1.12359	0.317533	2.46831e-05	0.000446577	RPL7P14	NA	processed_pseudogene
ENSG00000225032	15.5904	0.882609	0.250569	2.51757e-05	0.000453144	AL162586.1	NA	antisense
ENSG00000256196	13.0442	-1.17226	0.37378	2.74555e-05	0.000483512	AP003721.1	NA	antisense
ENSG00000260838	34.1293	-1.09943	0.356806	2.77427e-05	0.000487518	AC022893.2	NA	lincRNA
ENSG00000228400	18.0184	-1.20233	0.395789	2.8744e-05	0.000497966	AC079154.1	NA	antisense
ENSG00000237984	24.6783	-0.957948	0.295616	3.16094e-05	0.000532453	PTENP1	NA	transcribed_processed_pseudogene
ENSG00000203930	75345.6	0.677177	0.195728	3.1773e-05	0.000533451	LINC00632	NA	antisense
ENSG00000249307	17.0872	1.33118	0.464181	3.22581e-05	0.000539007	LINC01088	NA	processed_transcript
ENSG00000236901	609.287	-0.546257	0.151125	3.36072e-05	0.000555108	MIR600HG	NA	sense_intronic
ENSG00000152931	552.347	-0.944131	0.309887	3.45156e-05	0.000567488	PART1	NA	lincRNA
ENSG00000251348	32.4576	1.0437	0.335649	3.46553e-05	0.000568506	HSPD1P11	NA	processed_pseudogene
ENSG00000277027	3106.51	0.75643	0.228152	3.48861e-05	0.000571116	RMRP	NA	ribozyme
ENSG00000280652	648.457	0.708936	0.20972	3.51177e-05	0.000573097	SCARNA5	NA	scaRNA
ENSG00000183935	63.505	-0.794288	0.236869	3.53114e-05	0.000575492	HTR7P1	NA	transcribed_processed_pseudogene
ENSG00000170629	314.201	-0.447093	0.118884	3.54083e-05	0.000576686	DPY19L2P2	NA	transcribed_unprocessed_pseudogene
ENSG00000177410	158.804	0.522794	0.142588	3.58884e-05	0.000582568	ZFAS1	NA	antisense
ENSG00000215105	276.476	-0.583577	0.164031	3.8586e-05	0.000616545	TTC3P1	NA	processed_pseudogene
ENSG00000259644	28.0551	0.672778	0.190946	3.91987e-05	0.000623487	AC022613.3	NA	sense_intronic
ENSG00000261829	17.3266	0.706843	0.20194	4.04214e-05	0.000637959	AC009407.1	NA	sense_overlapping
ENSG00000238105	74.7255	0.687617	0.201069	4.38027e-05	0.000677351	GOLGA2P5	NA	transcribed_unprocessed_pseudogene
ENSG00000214381	4.38072	-1.54915	0.52778	4.48405e-05	0.000690781	LINC00488	NA	processed_transcript
ENSG00000228971	20.9113	-1.55726	0.612546	4.81525e-05	0.000723144	LINC02607	NA	lincRNA
ENSG00000260953	4.68513	-1.79534	0.642212	5.01962e-05	0.000746055	AC009093.4	NA	lincRNA
ENSG00000241163	15.0957	1.76049	0.741969	5.07697e-05	0.000751385	LINC00877	NA	lincRNA
ENSG00000280579	7.78585	-1.12346	0.350865	5.18489e-05	0.000764684	AC006359.2	NA	lincRNA
ENSG00000236375	8.33984	1.02646	0.320641	5.402e-05	0.000790814	POU5F1P5	NA	processed_pseudogene
ENSG00000245910	169.156	0.563564	0.160898	5.42636e-05	0.000792552	SNHG6	NA	processed_transcript
ENSG00000231721	628.664	0.437789	0.119837	5.62197e-05	0.000811919	LINC-PINT	NA	processed_transcript
ENSG00000261051	13.0011	1.12137	0.38161	5.72504e-05	0.000824372	AC107021.2	NA	sense_overlapping
ENSG00000245532	10890	0.928842	0.320537	6.12519e-05	0.000868202	NEAT1	NA	lincRNA
ENSG00000260412	168.125	-0.908776	0.307203	6.24245e-05	0.000880235	AL353746.1	NA	sense_overlapping
ENSG00000247081	89.7369	1.18545	0.460523	6.34378e-05	0.000891443	BAALC-AS1	NA	antisense
ENSG00000278740	7.14544	0.965422	0.295436	6.39003e-05	0.000896398	AC005332.7	NA	lincRNA
ENSG00000224186	3.6492	2.0135	0.713672	7.03464e-05	0.000962016	C5orf66	100996485	antisense
ENSG00000274718	23.2273	-0.843256	0.266273	7.15535e-05	0.000971316	AL136964.1	NA	lincRNA
ENSG00000265688	10.6137	-1.0022	0.330119	7.53595e-05	0.00101188	MAFG-DT	NA	bidirectional_promoter_lncRNA
ENSG00000227835	27.5164	-0.731184	0.224749	7.91903e-05	0.00105125	CARM1P1	NA	transcribed_unprocessed_pseudogene
ENSG00000213144	9.57548	1.01325	0.331579	7.92434e-05	0.00105138	AC084880.1	NA	processed_pseudogene
ENSG00000257501	15.1813	-1.16528	0.419063	8.02253e-05	0.00106211	AC007424.1	NA	transcribed_processed_pseudogene
ENSG00000253716	8.32158	1.0246	0.335457	8.33424e-05	0.00109403	MINCR	NA	antisense
ENSG00000180769	154.855	0.468942	0.135598	9.01145e-05	0.00116316	WDFY3-AS2	NA	antisense
ENSG00000280474	21.8323	-0.68316	0.21156	9.868e-05	0.0012529	AL356481.2	NA	sense_intronic
ENSG00000282164	278.665	-0.590629	0.182617	0.000103185	0.00129807	PEG13	NA	sense_intronic
ENSG00000276232	67.5668	-0.0157521	0.27176	0.00010405	0.00130819	AC006064.5	NA	sense_intronic
ENSG00000260328	113.711	-0.921571	0.326389	0.000106955	0.00133444	AC104024.2	NA	lincRNA
ENSG00000284703	36.4624	-0.486741	0.14272	0.000108973	0.00135271	AL805961.2	NA	lincRNA
ENSG00000174028	130.557	-1.06168	0.386681	0.000109035	0.00135279	FAM3C2	NA	processed_pseudogene
ENSG00000270607	47.9276	-0.664465	0.211883	0.000112254	0.00138642	AC009549.1	NA	lincRNA
ENSG00000214765	164.592	0.379113	0.106687	0.000113489	0.00139603	SEPT7P2	NA	transcribed_unprocessed_pseudogene
ENSG00000236912	4.55101	-1.41824	0.480717	0.000113686	0.00139775	SAPCD1-AS1	NA	processed_transcript
ENSG00000223959	145.291	0.556438	0.168518	0.00011411	0.00140015	AFG3L1P	NA	transcribed_unitary_pseudogene
ENSG00000233967	31.7899	0.776565	0.253453	0.000115838	0.00141567	AL359715.1	NA	lincRNA
ENSG00000282936	94.8308	-0.474976	0.139387	0.000118737	0.00144318	AC004706.3	NA	TEC
ENSG00000272734	27.9576	0.821808	0.277914	0.000123629	0.00149169	ADIRF-AS1	NA	processed_transcript
ENSG00000230409	35.1642	0.868099	0.297931	0.000127892	0.00152939	TCEA1P2	NA	processed_pseudogene
ENSG00000240207	72.5736	-0.781116	0.265417	0.000133901	0.0015873	AC080013.1	NA	antisense
ENSG00000272143	15.027	0.784723	0.254773	0.000133993	0.00158762	FGF14-AS2	NA	lincRNA
ENSG00000269825	71.4451	0.588443	0.183903	0.000139946	0.0016399	AC022150.4	NA	sense_intronic
ENSG00000283538	10.9156	-0.936511	0.324554	0.000142322	0.00166058	AC005972.3	NA	lincRNA
ENSG00000241158	15.1861	-1.47959	0.916345	0.00014641	0.00169315	ADAMTS9-AS1	NA	processed_transcript
ENSG00000259834	98.1619	-0.845054	0.312486	0.000148346	0.00170646	AL365361.1	NA	lincRNA
ENSG00000261556	201.458	0.419176	0.122854	0.000149009	0.00171203	SMG1P7	NA	transcribed_unprocessed_pseudogene
ENSG00000282417	841.198	0.364157	0.104355	0.000149777	0.00171808	HERC2P9	NA	transcribed_unprocessed_pseudogene
ENSG00000273301	92.2457	-0.959711	0.365318	0.000155501	0.001768	AC016717.2	NA	lincRNA
ENSG00000255929	11.1908	-0.774342	0.254057	0.000157188	0.00178221	AP000943.3	NA	antisense
ENSG00000259994	77.2026	-0.309435	0.0867218	0.000157412	0.00178393	AL353796.1	NA	sense_overlapping
ENSG00000250686	228.76	0.373447	0.107539	0.000157784	0.00178731	KHDRBS2-OT	NA	3prime_overlapping_ncRNA
ENSG00000251441	7.21139	1.30879	0.52815	0.000160129	0.00180605	RTEL1P1	NA	transcribed_processed_pseudogene
ENSG00000282114	9.52731	1.14823	0.435156	0.000164792	0.00184366	LINC00824	NA	processed_transcript
ENSG00000234358	20.0712	0.715658	0.234828	0.000166465	0.00185729	AC003080.1	NA	processed_pseudogene
ENSG00000227053	6.20129	-1.32767	0.522858	0.000170081	0.00188732	AC105446.1	NA	antisense
ENSG00000253875	19.2242	0.896069	0.328209	0.000177635	0.00194469	AC013643.2	NA	antisense
ENSG00000267731	32.1411	0.647557	0.207803	0.000178313	0.00194862	AC005332.2	NA	lincRNA
ENSG00000226328	82.693	-0.702213	0.240657	0.000188771	0.00203386	NUP50-DT	NA	lincRNA
ENSG00000205488	26.1551	-1.11816	0.479574	0.000192707	0.00206536	CALML3-AS1	NA	antisense
ENSG00000237517	383.556	-0.766808	0.27262	0.000193493	0.00206925	DGCR5	NA	transcribed_unprocessed_pseudogene
ENSG00000285051	77.2307	0.705566	0.245404	0.000196091	0.00209155	SLC7A14-AS1	NA	processed_transcript
ENSG00000222112	4.72766	1.14732	0.418966	0.000202076	0.00213861	RN7SKP16	NA	misc_RNA
ENSG00000215483	19.5844	0.808928	0.283327	0.000205628	0.00217057	LINC00598	NA	lincRNA
ENSG00000267056	33.8704	1.02506	0.410958	0.000210802	0.00220994	AC005336.1	NA	processed_pseudogene
ENSG00000259924	58.9202	0.723606	0.248801	0.000219403	0.00228058	AC011939.1	NA	processed_pseudogene
ENSG00000223797	34.7256	0.62739	0.208999	0.000229486	0.00236498	ENTPD3-AS1	NA	antisense
ENSG00000272944	17.8329	-0.934921	0.35396	0.000229974	0.00236635	AC079834.2	NA	antisense
ENSG00000257337	140.957	0.696673	0.247409	0.000235599	0.0024161	AC068888.1	NA	antisense
ENSG00000225125	20.7754	0.566464	0.179943	0.000236429	0.00242259	RANP4	NA	processed_pseudogene
ENSG00000234614	30.3437	-0.695177	0.238481	0.000238933	0.00244619	C2CD4D-AS1	NA	antisense
ENSG00000249436	25.3328	-0.230615	0.420696	0.000239042	0.00244628	AC008780.2	NA	lincRNA
ENSG00000262503	10.5741	0.976034	0.372105	0.000240427	0.00245943	AC027763.1	NA	processed_pseudogene
ENSG00000284240	9.64681	-1.07236	0.425055	0.000242586	0.00247944	AC099062.1	101927844	lincRNA
ENSG00000249042	188.402	-0.616761	0.21369	0.000251935	0.00255262	AC008771.1	NA	antisense
ENSG00000272341	54.0245	-0.595753	0.199302	0.000267631	0.00267571	AL137003.2	NA	lincRNA
ENSG00000224699	45.5457	0.500687	0.158301	0.000272547	0.00271096	LAMTOR5-AS1	NA	processed_transcript
ENSG00000278600	48.8711	0.33568	0.0990205	0.000279622	0.0027656	AC015871.3	NA	sense_intronic
ENSG00000231607	48.2209	0.6381	0.216584	0.00028626	0.00281528	DLEU2	NA	antisense
ENSG00000243854	7.54262	0.934178	0.341902	0.000286689	0.00281729	RN7SL67P	NA	misc_RNA
ENSG00000088340	31.9736	0.858433	0.325929	0.000289177	0.00283945	FER1L4	NA	transcribed_unitary_pseudogene
ENSG00000171889	19.623	1.09262	0.451233	0.000290305	0.00284883	MIR31HG	NA	sense_overlapping
ENSG00000283128	12.4723	1.15716	0.506417	0.000291836	0.00285868	AC009403.2	NA	processed_transcript
ENSG00000165121	164.243	0.638691	0.224536	0.000293309	0.00286853	AL353743.1	NA	transcribed_unprocessed_pseudogene
ENSG00000188013	18.195	-0.676808	0.232602	0.000294398	0.00287138	MEIS3P2	NA	processed_pseudogene
ENSG00000267801	3.75535	1.25215	0.478801	0.000297637	0.00289581	AC087289.6	NA	antisense
ENSG00000270742	1295.57	0.613311	0.212588	0.000298176	0.0028976	AC096947.1	NA	sense_intronic
ENSG00000280614	88.8259	1.05578	0.507651	0.000305854	0.0029557	FP236383.2	NA	lincRNA
ENSG00000277351	3.64616	1.70156	0.717227	0.000306578	0.00296044	AC013553.3	NA	antisense
ENSG00000255495	105.382	0.51401	0.169132	0.000312201	0.00300408	AC145124.1	NA	antisense
ENSG00000234456	705.483	0.401239	0.12448	0.00031521	0.00302734	MAGI2-AS3	NA	processed_transcript
ENSG00000236064	8.13094	-1.43358	0.973432	0.000317601	0.00304407	AL034399.2	NA	antisense
ENSG00000233237	333.715	0.524221	0.173642	0.000318088	0.00304755	LINC00472	NA	lincRNA
ENSG00000280828	56.3098	0.613724	0.209993	0.000323095	0.00308235	AC090114.3	NA	unprocessed_pseudogene
ENSG00000285996	8.55658	-0.805401	0.285872	0.000327812	0.00311821	AC006116.11	NA	antisense
ENSG00000184385	17.4351	-0.81384	0.307077	0.000328268	0.00311978	UMODL1-AS1	NA	sense_overlapping
ENSG00000271871	5.87429	0.962156	0.360955	0.000335608	0.00317318	AC005740.4	NA	antisense
ENSG00000132967	64.1811	1.18529	0.801045	0.000344409	0.00324136	HMGB1P5	NA	transcribed_processed_pseudogene
ENSG00000228446	15.1525	0.633906	0.215568	0.000347488	0.00326156	AC073052.1	NA	processed_pseudogene
ENSG00000261292	71.8494	-0.89267	0.383727	0.000347462	0.00326156	AC110491.1	NA	lincRNA
ENSG00000274330	4.34827	-1.16909	0.476061	0.000353077	0.00330262	AL160191.3	NA	unprocessed_pseudogene
ENSG00000256274	27.4733	0.652964	0.227254	0.000356725	0.003326	TAS2R64P	NA	transcribed_unprocessed_pseudogene
ENSG00000203721	8.04858	1.30277	0.56404	0.000364943	0.00338516	LINC00862	NA	lincRNA
ENSG00000260260	20.5198	0.787485	0.299538	0.000367065	0.0033997	SNHG19	NA	lincRNA
ENSG00000236078	9.1404	0.740201	0.26071	0.000367646	0.0034025	LINC01447	NA	lincRNA
ENSG00000145063	34.7173	-0.727288	0.266965	0.000373456	0.00343807	AC062028.1	NA	lincRNA
ENSG00000196696	413.803	0.500918	0.166578	0.000376276	0.00345494	AC009022.1	NA	processed_transcript
ENSG00000286084	36.6228	-0.779761	0.303622	0.000380773	0.00347895	AL096794.1	NA	bidirectional_promoter_lncRNA
ENSG00000238039	5.29869	1.0068	0.388592	0.000381336	0.0034818	AC244197.2	NA	lincRNA
ENSG00000261338	43.8644	-0.465654	0.150484	0.000385673	0.00351223	AC021016.2	NA	sense_overlapping
ENSG00000271959	5.32437	1.30825	0.565294	0.000387454	0.00352452	AC100803.3	NA	antisense
ENSG00000232104	22.5861	0.768916	0.287892	0.000393798	0.00357161	RFX3-AS1	NA	lincRNA
ENSG00000224315	11.6447	0.696792	0.24837	0.000411207	0.00367907	RPL7P7	NA	processed_pseudogene
ENSG00000278829	10.5176	0.714301	0.25371	0.000413627	0.00369667	AC099811.5	NA	sense_intronic
ENSG00000271849	5.90329	-1.07688	0.448765	0.000414641	0.00370168	AC012603.1	NA	lincRNA
ENSG00000239911	65.609	-0.756746	0.304971	0.000415092	0.00370435	PRKAG2-AS1	NA	antisense
ENSG00000251432	14.8431	0.810039	0.308357	0.000415696	0.00370839	LINC02615	NA	lincRNA
ENSG00000259234	57.9327	-0.793141	0.322046	0.000421342	0.00374511	ANKRD34C-AS1	NA	lincRNA
ENSG00000254510	2.53502	-1.85288	0.785497	0.000421631	0.00374621	AP001107.5	NA	processed_transcript
ENSG00000260549	7.43232	1.05709	0.451868	0.000427277	0.00378412	MT1L	NA	transcribed_unprocessed_pseudogene
ENSG00000236882	15.7329	0.782259	0.29856	0.000427868	0.00378798	LINC01554	NA	lincRNA
ENSG00000228828	60.7461	0.647826	0.237748	0.000431808	0.00381184	TLK2P2	NA	processed_pseudogene
ENSG00000251034	56.1331	0.868626	0.374949	0.000436143	0.00384179	AC037459.2	NA	antisense
ENSG00000159247	9.64107	-0.898273	0.361152	0.000439797	0.00386702	TUBBP5	NA	transcribed_unprocessed_pseudogene
ENSG00000283608	3.06144	2.05269	0.936713	0.000446253	0.00391395	AL031056.2	NA	lincRNA
ENSG00000270059	13.3634	-0.762608	0.279651	0.000449597	0.00393153	AC121493.1	NA	sense_intronic
ENSG00000267343	5.73969	-1.47158	0.893163	0.000452178	0.0039445	ZNF833P	NA	transcribed_unprocessed_pseudogene
ENSG00000250241	40.3725	0.824147	0.333766	0.000453024	0.00394927	AC105383.1	NA	lincRNA
ENSG00000260917	228.383	-0.190321	0.0560291	0.000465198	0.00403529	AL158212.3	NA	sense_overlapping
ENSG00000233508	33.5682	-1.17659	0.598361	0.000479515	0.00413895	AL021395.1	NA	lincRNA
ENSG00000273329	108.994	0.561808	0.200543	0.000481078	0.00414805	AC078846.1	NA	lincRNA
ENSG00000205704	83.6903	-0.550909	0.193916	0.000487212	0.00418944	LINC00634	NA	transcribed_unitary_pseudogene
ENSG00000214106	95.3245	0.478593	0.161578	0.00049012	0.00420692	PAXIP1-AS2	NA	antisense
ENSG00000229992	12.8376	0.678363	0.247097	0.000496357	0.00424391	HMGB3P9	NA	processed_pseudogene
ENSG00000260804	515.704	-0.540635	0.193815	0.000506915	0.0043176	LINC01963	NA	lincRNA
ENSG00000236021	4.5098	0.975139	0.381517	0.00052246	0.00442231	AL359265.3	NA	antisense
ENSG00000271894	62.1425	-1.03008	0.789959	0.000522459	0.00442231	AC007744.1	NA	processed_transcript
ENSG00000257557	16.1818	0.640107	0.229958	0.000545029	0.00458322	PPP1R12A-AS1	NA	bidirectional_promoter_lncRNA
ENSG00000273828	7.42674	1.25967	0.758661	0.000545494	0.00458411	AL133227.1	NA	antisense
ENSG00000270344	137.674	0.508585	0.176297	0.00055783	0.00465886	POC1B-AS1	NA	antisense
ENSG00000260179	6.69105	0.842649	0.325248	0.000567562	0.00471921	AL162741.1	NA	lincRNA
ENSG00000234773	57.6761	-0.435814	0.144828	0.000568502	0.00472382	AC012618.3	NA	transcribed_unprocessed_pseudogene
ENSG00000242588	225.309	0.473452	0.162916	0.000592238	0.00488457	AC108010.1	NA	processed_transcript
ENSG00000276517	83.4237	0.446398	0.149797	0.000594776	0.00489945	AL133243.3	NA	sense_intronic
ENSG00000256925	24.2852	-0.83914	0.361139	0.000597934	0.00491828	ADGRA1-AS1	NA	antisense
ENSG00000234741	237.194	0.384943	0.126017	0.0006025	0.00494704	GAS5	NA	processed_transcript
ENSG00000246082	4.4394	0.861222	0.332639	0.000612365	0.0050017	NUDT16P1	NA	transcribed_unitary_pseudogene
ENSG00000248323	20.6676	1.01098	0.490689	0.000619033	0.00504102	LUCAT1	NA	antisense
ENSG00000284697	11.233	0.740674	0.285527	0.000631163	0.0051109	AC006511.5	NA	processed_transcript
ENSG00000283907	1901.37	0.661308	0.262946	0.000633704	0.00512977	AD000090.1	NA	antisense
ENSG00000282685	10.948	-0.906503	0.386747	0.000644801	0.00520084	FAM83H-AS1	NA	processed_transcript
ENSG00000205583	59.9688	0.558046	0.203905	0.000645949	0.00520499	STAG3L1	NA	transcribed_unprocessed_pseudogene
ENSG00000273032	48.3831	-0.625948	0.23723	0.000648631	0.00522297	DGCR9	NA	processed_transcript
ENSG00000273345	26.0382	0.562672	0.202822	0.00067065	0.00536323	AC104109.4	NA	processed_transcript
ENSG00000260920	68.6138	-0.535212	0.195362	0.000674757	0.00538727	AL031985.3	NA	sense_overlapping
ENSG00000270589	8.87945	0.655258	0.240709	0.000675299	0.00538809	AL158163.1	NA	antisense
ENSG00000282330	36.2873	0.426352	0.142939	0.000686963	0.00545802	AC068473.8	NA	lincRNA
ENSG00000127957	95.9868	0.461989	0.159147	0.000687473	0.00545853	PMS2P3	NA	transcribed_unprocessed_pseudogene
ENSG00000200488	760.918	0.675164	0.27256	0.000688866	0.0054668	RN7SKP203	NA	misc_RNA
ENSG00000261716	170.265	0.642993	0.258449	0.000698522	0.00552403	AC239868.1	NA	transcribed_unprocessed_pseudogene
ENSG00000280776	23.4256	-0.921321	0.476264	0.000698656	0.00552403	LINC01202	NA	lincRNA
ENSG00000273799	21.2366	0.175213	0.355213	0.000701448	0.00554252	AC146335.1	NA	unprocessed_pseudogene
ENSG00000233304	5.67366	-1.128	0.583243	0.000701776	0.00554333	LINC01346	NA	lincRNA
ENSG00000235026	27.1041	-0.68996	0.28059	0.000724112	0.00567217	DPP10-AS1	NA	antisense
ENSG00000266127	5.52783	1.05491	0.490764	0.000724537	0.00567369	ZNF415P1	NA	processed_pseudogene
ENSG00000282749	12.9728	-0.80833	0.342895	0.000743163	0.00578861	AC006449.10	NA	antisense
ENSG00000228382	6.0775	1.03396	0.482216	0.000760514	0.00589077	ITPKB-IT1	NA	sense_intronic
ENSG00000263069	51.3556	-0.64933	0.261145	0.000769988	0.00594496	AC124319.3	NA	antisense
ENSG00000259985	15.9769	-0.805227	0.348156	0.000771584	0.00595261	AC017100.1	NA	antisense
ENSG00000255087	6.47951	-1.11534	0.565517	0.000781469	0.0060005	AP001993.1	NA	lincRNA
ENSG00000197083	18.2054	0.733369	0.308206	0.000790521	0.00606287	ZNF300P1	NA	transcribed_unprocessed_pseudogene
ENSG00000257497	7.73737	0.819884	0.338419	0.000794201	0.0060868	AC121761.1	NA	antisense
ENSG00000272316	238.101	0.474599	0.16858	0.00079755	0.00610483	AL021368.2	NA	lincRNA
ENSG00000263878	9.87026	-1.15586	0.609327	0.000799292	0.00611624	DLGAP1-AS4	NA	antisense
ENSG00000231057	4.62069	1.00202	0.441454	0.000802428	0.00613257	AC096637.2	NA	antisense
ENSG00000128262	10.02	1.19446	1.27254	0.000805635	0.0061494	POM121L9P	NA	transcribed_unprocessed_pseudogene
ENSG00000226318	31.9379	0.654528	0.261508	0.000809693	0.00617076	RPS3AP38	NA	processed_pseudogene
ENSG00000231689	4.73193	-1.33298	0.610899	0.000810578	0.00617174	LINC01090	NA	lincRNA
ENSG00000254258	37.8786	0.467468	0.163123	0.000818284	0.00622074	AC087354.1	NA	lincRNA
ENSG00000272688	5.74753	0.827128	0.339125	0.000828327	0.00628148	AP005329.3	NA	lincRNA
ENSG00000233705	68.2679	-1.06274	0.655082	0.000846314	0.00639608	SLC26A4-AS1	NA	antisense
ENSG00000233452	44.7576	0.550424	0.207232	0.000864518	0.00649269	STXBP5-AS1	NA	antisense
ENSG00000186369	165.203	-0.662317	0.281396	0.000874828	0.00653891	LINC00643	NA	transcribed_unitary_pseudogene
ENSG00000224511	2.19273	1.32594	0.668037	0.000882971	0.00659172	LINC00365	NA	lincRNA
ENSG00000259488	32.9652	0.361462	0.120148	0.000890387	0.00662889	AC023355.1	NA	antisense
ENSG00000233487	19.1116	-0.768378	0.339472	0.000897866	0.00667442	RPSAP69	NA	transcribed_processed_pseudogene
ENSG00000280651	2.31898	1.53214	0.76086	0.00090699	0.0067197	AC156455.2	NA	processed_transcript
ENSG00000227640	45.3022	0.588555	0.233776	0.000909812	0.00673255	SOX21-AS1	NA	lincRNA
ENSG00000168852	32.6364	0.437235	0.152412	0.000914617	0.00675382	TPTE2P5	NA	transcribed_unprocessed_pseudogene
ENSG00000241549	178.568	0.530664	0.200688	0.000915183	0.00675596	GUSBP2	NA	transcribed_unprocessed_pseudogene
ENSG00000233532	7.60178	-1.06835	0.617692	0.000922176	0.00680143	LINC00460	NA	lincRNA
ENSG00000257354	53.2053	0.530533	0.196901	0.000937132	0.00687858	AC048341.1	NA	lincRNA
ENSG00000260572	19.6544	0.644929	0.255454	0.000947175	0.00693151	AC069224.1	NA	antisense
ENSG00000202198	566.706	-0.0270802	0.272695	0.000948985	0.00693282	RF00100	NA	misc_RNA
ENSG00000228794	369.571	-0.476886	0.176365	0.000949765	0.00693282	LINC01128	NA	processed_transcript
ENSG00000259685	2.45245	1.45928	0.722594	0.000949157	0.00693282	IDH2-DT	NA	lincRNA
ENSG00000256193	24.5147	-0.179106	0.353762	0.000960839	0.00699386	LINC00507	NA	lincRNA
ENSG00000227543	4.4229	1.03179	0.46616	0.000965479	0.00702138	SPAG5-AS1	NA	processed_transcript
ENSG00000254447	5.87948	0.798341	0.324064	0.00098325	0.00712522	OR7E11P	NA	processed_transcript
ENSG00000237296	1779.47	0.431413	0.154669	0.00100461	0.00723286	SMG1P1	NA	transcribed_unprocessed_pseudogene
ENSG00000273066	42.4368	0.455279	0.164599	0.00102172	0.00733882	AL355987.4	NA	processed_transcript
ENSG00000230701	21.5773	0.485353	0.175483	0.00102281	0.00734265	FBXW4P1	NA	processed_pseudogene
ENSG00000270953	139.795	-0.581285	0.238068	0.00102787	0.0073637	AC007938.3	NA	antisense
ENSG00000283236	67.9315	0.484185	0.178013	0.00102957	0.00737359	AC074141.1	NA	transcribed_unprocessed_pseudogene
ENSG00000268257	3.89305	-1.03779	0.480468	0.0010476	0.00746775	AIRN	NA	antisense
ENSG00000186162	91.1675	-0.313405	0.103262	0.00105046	0.00748376	CIDECP1	NA	transcribed_unprocessed_pseudogene
ENSG00000229368	11.9206	-0.724495	0.308166	0.00106495	0.00756281	AC090587.2	NA	sense_overlapping
ENSG00000281880	10.6018	0.767582	0.338149	0.00107329	0.00760877	PAUPAR	NA	processed_transcript
ENSG00000229473	4.31935	1.01167	0.488453	0.00107529	0.00761634	RGS17P1	NA	processed_pseudogene
ENSG00000285851	18.3402	0.609614	0.239456	0.00108077	0.00765072	AL359762.3	NA	processed_transcript
ENSG00000267011	6.94404	-1.14611	2.00343	0.00109222	0.00772286	AC011498.1	NA	lincRNA
ENSG00000265801	20.1575	-0.756838	0.336994	0.00109718	0.0077534	AC069366.2	NA	sense_intronic
ENSG00000261423	20.2226	0.517887	0.192409	0.00110375	0.00778859	TMEM202-AS1	NA	lincRNA
ENSG00000250786	11.3383	0.967383	0.499075	0.00110844	0.00780596	SNHG18	NA	lincRNA
ENSG00000206145	16.5953	-0.897566	0.481093	0.00111765	0.00785277	P2RX6P	NA	transcribed_unprocessed_pseudogene
ENSG00000250007	13.4041	-0.84699	0.428193	0.00112875	0.00792161	AC087457.1	NA	antisense
ENSG00000247679	8.03983	0.736598	0.306462	0.00114549	0.00800469	AC139795.2	NA	antisense
ENSG00000260658	8.75217	-0.284581	0.514905	0.0011941	0.00826127	AC138305.1	NA	lincRNA
ENSG00000272163	162.757	-0.584413	0.2463	0.00119419	0.00826127	AF106564.1	NA	antisense
ENSG00000216802	6.11339	1.00904	0.470219	0.00120175	0.00830304	AL590617.1	NA	processed_pseudogene
ENSG00000216895	48.7686	0.471327	0.174453	0.00120501	0.00832123	AC009403.1	NA	antisense
ENSG00000228543	9.75728	-0.815429	0.368815	0.00120724	0.00832684	AC003684.1	NA	lincRNA
ENSG00000223773	20.6302	0.94151	0.494608	0.00121955	0.00839285	CD99P1	NA	transcribed_unprocessed_pseudogene
ENSG00000260912	35.6275	0.596917	0.248853	0.0012235	0.00841057	AL158206.1	NA	sense_overlapping
ENSG00000263551	61.29	0.55053	0.218149	0.00124196	0.00850486	AP005328.1	NA	lincRNA
ENSG00000251562	165116	0.518676	0.203347	0.0012536	0.00854789	MALAT1	NA	lincRNA
ENSG00000254929	74.2307	0.567916	0.229385	0.00126298	0.00860222	AL591684.2	NA	processed_transcript
ENSG00000247556	5240.62	-0.303099	0.103002	0.00128247	0.0087132	OIP5-AS1	NA	processed_transcript
ENSG00000267107	23.5155	0.761512	0.374912	0.0012839	0.00872048	PCAT19	NA	lincRNA
ENSG00000229036	30.0683	0.545208	0.215338	0.00130924	0.00886061	VDAC1P8	NA	transcribed_processed_pseudogene
ENSG00000286000	9.13389	0.804777	0.377046	0.00132085	0.00892195	AC234775.4	NA	lincRNA
ENSG00000285628	47.7597	-0.663315	0.285677	0.00132551	0.00894598	AC126755.6	NA	processed_transcript
ENSG00000260708	18.8524	0.516135	0.196277	0.00133426	0.00900017	AL118516.1	NA	antisense
ENSG00000198416	71.8445	-0.391326	0.140035	0.00134152	0.00903093	ZNF658B	NA	transcribed_unprocessed_pseudogene
ENSG00000249330	8.00808	0.716737	0.300237	0.00135844	0.00910659	AC095060.1	NA	bidirectional_promoter_lncRNA
ENSG00000275560	46.1195	0.610405	0.257704	0.00136182	0.00912068	AC008115.3	NA	sense_intronic
ENSG00000248265	59.2802	0.590954	0.247453	0.00137391	0.00919159	AC023794.1	NA	lincRNA
ENSG00000225031	5.24024	1.05145	0.549832	0.00138175	0.00923393	EIF4BP7	NA	processed_pseudogene
ENSG00000240875	12.8895	0.773136	0.361512	0.00139469	0.00930768	LINC00886	NA	lincRNA
ENSG00000233560	7.64495	0.698649	0.2995	0.00144932	0.00959298	KRT8P39	NA	processed_pseudogene
ENSG00000224083	10.6276	0.662496	0.284277	0.00148226	0.00975642	MTCO1P11	NA	unprocessed_pseudogene
ENSG00000236567	5.77546	0.662063	0.272727	0.00148694	0.00977938	TCF3P1	NA	processed_pseudogene
ENSG00000268460	31.4202	0.565258	0.229835	0.00148658	0.00977938	AC006262.1	NA	processed_transcript
ENSG00000258738	6.48677	0.838485	0.407457	0.00150859	0.00989253	AL121603.2	112268124	antisense
ENSG00000280164	9.06675	0.871467	0.426919	0.00151506	0.00992697	CU638689.5	NA	lincRNA
ENSG00000224165	72.7872	0.591058	0.253442	0.0015228	0.00996171	DNAJC27-AS1	NA	antisense
ENSG00000283050	309.408	0.341422	0.119887	0.00152372	0.00996506	GTF2IP12	NA	transcribed_unprocessed_pseudogene
ENSG00000284649	5.07586	0.229064	0.421192	0.00152686	0.00997758	AC009093.8	NA	transcribed_unprocessed_pseudogene
ENSG00000205930	28.1359	0.68697	0.321584	0.00154493	0.0100768	C21orf62-AS1	NA	antisense
ENSG00000280434	99.1433	0.359112	0.127448	0.0015694	0.0102038	AL031595.3	NA	sense_overlapping
ENSG00000212464	8.17487	0.824929	0.416035	0.0015872	0.0102856	SNORA12	NA	snoRNA
ENSG00000273041	4.40456	0.839295	0.382535	0.00159636	0.0103297	ATF4P2	NA	processed_pseudogene
ENSG00000255198	9.40576	0.834141	0.417177	0.00159805	0.0103352	SNHG9	NA	lincRNA
ENSG00000196668	21.8731	0.723943	0.34724	0.00160211	0.0103505	LINC00173	NA	processed_transcript
ENSG00000174403	11.4503	-0.960364	0.815765	0.00161041	0.0103959	MIR1-1HG-AS1	NA	antisense
ENSG00000236240	4.85166	0.931321	0.481326	0.00161238	0.0104044	GPC5-IT1	NA	sense_intronic
ENSG00000276529	13.8905	-0.671767	0.306636	0.00161298	0.0104044	AP001505.1	NA	lincRNA
ENSG00000272755	20.1398	0.788641	0.444074	0.00164757	0.0105855	AC245297.2	NA	lincRNA
ENSG00000285367	20.593	0.676685	0.312061	0.00165563	0.0106234	AC087564.1	NA	lincRNA
ENSG00000234608	59.6891	-0.376643	0.138524	0.0016577	0.0106311	MAPKAPK5-AS1	NA	lincRNA
ENSG00000282633	10.3026	4.28585	1.86621	0.00166958	0.0106917	IGHA1	NA	IG_C_gene
ENSG00000230732	23.1278	0.484761	0.188159	0.0016899	0.0107923	AC016949.1	NA	sense_intronic
ENSG00000236948	2.62265	-1.21364	0.713538	0.00174328	0.0110611	AL365255.1	NA	lincRNA
ENSG00000128254	24.1427	-0.612135	0.271095	0.00174928	0.0110963	C22orf24	25775	processed_transcript
ENSG00000220323	84.6967	0.373132	0.136496	0.00175082	0.0111032	HIST2H2BD	NA	transcribed_unprocessed_pseudogene
ENSG00000283183	38.9271	-0.50055	0.20229	0.00176761	0.011201	AC116565.1	NA	lincRNA
ENSG00000223804	15.3003	0.709614	0.34988	0.00178463	0.0112796	AC244669.1	NA	transcribed_unprocessed_pseudogene
ENSG00000268069	15.5386	0.593041	0.252912	0.00178908	0.0113019	AC004466.1	NA	antisense
ENSG00000260672	9.81058	0.571649	0.232345	0.00180793	0.0113974	AC100827.4	NA	lincRNA
ENSG00000232504	10.0387	0.241802	0.440557	0.00181425	0.0114196	ST3GAL5-AS1	NA	lincRNA
ENSG00000233393	35.3509	0.647974	0.301784	0.0018184	0.0114369	AP000688.2	NA	lincRNA
ENSG00000255284	26.3304	0.493682	0.197037	0.0018195	0.0114409	AP006621.3	NA	lincRNA
ENSG00000269958	37.3884	0.595504	0.268335	0.00182058	0.0114448	AL049840.4	NA	sense_intronic
ENSG00000233010	3.54602	0.97876	0.541265	0.00183526	0.0115197	RPEP4	NA	processed_pseudogene
ENSG00000215022	11.4304	0.825624	0.485498	0.00183821	0.0115319	AL008729.1	100130357	antisense
ENSG00000240032	4.56762	0.878702	0.428027	0.00183798	0.0115319	LNCSRLR	NA	antisense
ENSG00000235314	219.166	-0.302178	0.106418	0.0018518	0.0115786	LINC00957	NA	lincRNA
ENSG00000248283	26.4208	0.520376	0.213011	0.00185049	0.0115786	CCNL2P1	NA	processed_pseudogene
ENSG00000230393	8.27818	-0.796591	0.392359	0.00186131	0.0116244	AC092667.1	NA	antisense
ENSG00000261404	16.1365	0.665855	0.296801	0.00186576	0.011648	AC138627.1	NA	lincRNA
ENSG00000228206	3.36444	-0.927221	0.481704	0.00188161	0.0117201	AC016717.1	NA	processed_pseudogene
ENSG00000229495	3.40733	0.998651	0.516037	0.00188252	0.0117228	AL450327.1	NA	lincRNA
ENSG00000276255	17.0376	0.545453	0.224477	0.00188329	0.0117229	AL136379.1	NA	lincRNA
ENSG00000235814	27.1754	0.223484	0.405561	0.00189568	0.0117882	ZNRD1ASP	NA	antisense
ENSG00000232611	82.7786	0.416279	0.159096	0.00193478	0.0119842	AL683813.1	NA	lincRNA
ENSG00000242337	15.2256	0.562812	0.236501	0.00195015	0.0120625	INHCAP	NA	transcribed_unprocessed_pseudogene
ENSG00000235703	146.596	0.616727	0.282629	0.00195358	0.0120731	LINC00894	NA	antisense
ENSG00000230551	455.934	0.395256	0.149253	0.00197443	0.0121621	AC021078.1	NA	processed_transcript
ENSG00000236263	13.0336	-0.490809	0.192756	0.00199547	0.0122639	AC234582.2	NA	antisense
ENSG00000277476	79.5256	0.419507	0.161643	0.00201649	0.0123621	AC005332.5	NA	lincRNA
ENSG00000260213	8.91592	0.894897	0.737203	0.00202485	0.012404	AC092718.2	NA	antisense
ENSG00000228408	99.4139	0.694371	0.376764	0.00203701	0.0124697	AL031056.1	NA	lincRNA
ENSG00000235672	5.64343	0.982569	0.578792	0.00206171	0.0125857	AC090286.2	NA	transcribed_processed_pseudogene
ENSG00000234509	42.6409	0.462776	0.184879	0.00211597	0.0128592	AP000253.1	NA	lincRNA
ENSG00000272320	3.97311	0.811706	0.38946	0.00212458	0.012906	AL445309.1	NA	antisense
ENSG00000131401	12.7551	0.851584	0.974503	0.00213533	0.012944	NAPSB	NA	transcribed_unprocessed_pseudogene
ENSG00000243759	9.3002	0.751317	0.383439	0.00213524	0.012944	ST13P15	NA	processed_pseudogene
ENSG00000228242	3.4286	1.13917	0.750517	0.00215612	0.0130352	AC093495.1	NA	antisense
ENSG00000281603	126.646	0.538204	0.240214	0.00215923	0.0130508	MUC20-OT1	NA	lincRNA
ENSG00000179967	9.25089	0.950716	0.603181	0.00216207	0.0130648	PPP1R14BP3	NA	processed_pseudogene
ENSG00000275894	3.64463	1.01648	0.666543	0.00217442	0.0131232	AL021578.1	NA	sense_intronic
ENSG00000237892	6.70214	0.802801	0.41234	0.00218324	0.0131667	KLF7-IT1	NA	sense_intronic
ENSG00000275645	12.8104	-0.567884	0.24331	0.00219657	0.0132405	AC068338.3	NA	antisense
ENSG00000267629	12.9989	-0.355297	0.694797	0.00219874	0.0132478	AC138430.1	NA	processed_transcript
ENSG00000183666	249.816	0.537931	0.241909	0.00220859	0.0132868	GUSBP1	NA	transcribed_unprocessed_pseudogene
ENSG00000231233	11.4031	-0.624394	0.285088	0.00221038	0.013291	CFAP58-DT	NA	antisense
ENSG00000236086	2.6859	1.02239	0.502753	0.00222058	0.0133327	HMGN2P28	NA	processed_pseudogene
ENSG00000214188	15.2583	0.639414	0.299849	0.00224221	0.0134347	ST7-OT4	NA	sense_intronic
ENSG00000271265	5.86035	-0.899543	0.49554	0.00228396	0.013633	AL355297.3	NA	lincRNA
ENSG00000225840	12.255	0.947569	0.70453	0.00233903	0.0138919	AC010970.1	NA	processed_pseudogene
ENSG00000260630	124.882	-0.46714	0.195595	0.00236348	0.0139985	SNAI3-AS1	NA	antisense
ENSG00000270558	11.3366	-0.608546	0.269317	0.00236777	0.0140171	AC025449.1	NA	processed_pseudogene
ENSG00000285534	5.23787	0.901435	1.30921	0.00238356	0.0140867	AL163541.1	NA	lincRNA
ENSG00000274425	34.4264	-0.444435	0.178652	0.00239581	0.014142	AC114271.1	NA	antisense
ENSG00000263731	55.3797	-0.324852	0.118778	0.00240379	0.0141755	AC145207.5	NA	lincRNA
ENSG00000267457	14.669	0.782408	0.48363	0.00240766	0.0141915	AC004223.2	NA	lincRNA
ENSG00000231187	30.0809	-0.753424	0.423573	0.00241498	0.0142243	AL356056.2	NA	antisense
ENSG00000228107	16.9163	0.542034	0.232058	0.00242168	0.0142604	AP000692.1	NA	sense_overlapping
ENSG00000285067	3.66875	-0.877723	0.48559	0.00243894	0.0143392	AC270277.3	NA	antisense
ENSG00000268001	6.46867	0.697284	0.330318	0.00245265	0.0143852	CARD8-AS1	NA	antisense
ENSG00000257167	8.7287	0.514522	0.209888	0.0024573	0.0144008	TMPO-AS1	NA	antisense
ENSG00000245975	17.7569	0.452572	0.180338	0.00249943	0.0145571	AC090515.2	NA	lincRNA
ENSG00000179362	2.87761	1.22535	0.782532	0.00251655	0.0146433	HMGN2P46	NA	transcribed_processed_pseudogene
ENSG00000224081	46.7778	0.489147	0.208647	0.00253213	0.014723	SLC44A3-AS1	NA	transcribed_processed_pseudogene
ENSG00000204446	13.9616	0.683863	0.343586	0.00258226	0.0149671	C9orf170	401535	lincRNA
ENSG00000259235	13.0885	-0.661217	0.334929	0.00259967	0.015042	AC066612.1	NA	lincRNA
ENSG00000274270	3.63515	0.842059	0.445342	0.00263337	0.015189	AL137060.1	NA	sense_intronic
ENSG00000224247	6.152	-0.763957	0.389118	0.00263757	0.0152019	AJ009632.1	NA	lincRNA
ENSG00000227733	115.93	0.450373	0.187595	0.00267485	0.0153357	AC239809.3	NA	lincRNA
ENSG00000281801	96.3613	-0.692456	0.421357	0.00267508	0.0153357	KRTAP5-AS1	NA	antisense
ENSG00000203865	12.9674	0.767212	0.418775	0.00271792	0.0155231	ATP1A1-AS1	NA	processed_transcript
ENSG00000260790	4.91024	0.749292	0.375738	0.00271918	0.0155231	AC092338.3	NA	antisense
ENSG00000275405	226.145	0.601258	0.30828	0.00273597	0.015608	RF00003	NA	snRNA
ENSG00000220884	2.8971	-0.966516	0.788228	0.00278578	0.0158147	MESTP1	NA	processed_pseudogene
ENSG00000225808	2.55422	1.09667	0.744388	0.00279395	0.0158464	DNAJC19P5	NA	processed_pseudogene
ENSG00000284977	77.7679	0.59458	0.29732	0.00281395	0.0159266	AL160272.1	NA	lincRNA
ENSG00000261837	6.36744	0.722981	0.383705	0.00284985	0.0160966	AC046158.2	NA	sense_intronic
ENSG00000186076	20.9115	-0.792751	0.831657	0.00285912	0.0161449	AC012085.1	NA	processed_pseudogene
ENSG00000249896	114.22	-0.504837	0.228159	0.00286567	0.0161608	LINC02495	NA	transcribed_unprocessed_pseudogene
ENSG00000253549	5.36928	0.865162	0.569907	0.00286565	0.0161608	CA3-AS1	NA	antisense
ENSG00000286209	5.45921	-0.72536	0.361436	0.00291442	0.0163741	AC005252.4	NA	lincRNA
ENSG00000261799	114.241	0.244436	0.0874618	0.00292754	0.0164177	AC007406.5	NA	sense_overlapping
ENSG00000259915	9.24856	0.637687	0.300681	0.00293097	0.0164294	AC017071.1	NA	lincRNA
ENSG00000236194	14.0566	0.560895	0.254005	0.0029417	0.0164556	AC099811.1	NA	sense_intronic
ENSG00000229241	8.38239	0.624321	0.299564	0.00298372	0.0166431	PNPT1P1	NA	processed_pseudogene
ENSG00000228863	23.8936	0.418184	0.168202	0.00299699	0.0166811	AL121985.1	NA	antisense
ENSG00000180747	1545.47	0.37286	0.148025	0.00300075	0.0166944	SMG1P3	NA	transcribed_unprocessed_pseudogene
ENSG00000223396	36.9001	0.542593	0.253465	0.00301535	0.016749	RPS10P7	NA	transcribed_processed_pseudogene
ENSG00000270039	14.7774	-0.516341	0.229006	0.00306654	0.0169679	AC025165.5	NA	lincRNA
ENSG00000214189	73.7662	0.383978	0.151262	0.00307168	0.0169848	ZNF788P	NA	transcribed_unprocessed_pseudogene
ENSG00000276863	6.1783	-0.836992	0.532635	0.00307927	0.0170152	AC124319.4	NA	antisense
ENSG00000256139	8.21728	0.780593	0.486723	0.00308502	0.0170354	AC007637.1	NA	sense_overlapping
ENSG00000281664	2.55513	0.941496	0.607826	0.0031223	0.0171986	LINC00538	NA	lincRNA
ENSG00000273419	5.88228	0.618333	0.28919	0.00321399	0.0175968	AC004877.1	NA	antisense
ENSG00000243069	88.6504	0.443101	0.18993	0.00321983	0.0176248	ARHGEF26-AS1	NA	processed_transcript
ENSG00000235613	41.4196	0.619665	0.340102	0.00322231	0.017629	NSRP1P1	NA	processed_pseudogene
ENSG00000237438	155.919	0.312967	0.118934	0.00323252	0.0176745	CECR7	NA	transcribed_unprocessed_pseudogene
ENSG00000236824	14402.1	0.451285	0.19563	0.0032469	0.0177334	BCYRN1	NA	scRNA
ENSG00000260751	8.44898	0.592126	0.276633	0.00324614	0.0177334	AC008870.2	NA	sense_intronic
ENSG00000276545	29.0928	0.492733	0.217461	0.00324667	0.0177334	PCDHGB9P	NA	unprocessed_pseudogene
ENSG00000274925	53.3387	0.34531	0.133324	0.00325923	0.0177848	ZKSCAN2-DT	NA	lincRNA
ENSG00000268496	29.5947	-0.500099	0.220104	0.00326719	0.0178243	AC245884.9	NA	sense_intronic
ENSG00000258754	4.61302	-0.75048	0.414538	0.0033203	0.0180738	LINC01579	NA	lincRNA
ENSG00000250899	16.153	0.563313	0.262216	0.0033322	0.0181057	AC125807.2	NA	lincRNA
ENSG00000276649	64.0405	0.430755	0.18157	0.00333335	0.0181057	AL117335.1	NA	antisense
ENSG00000230084	27.7344	0.605061	0.313017	0.00334879	0.0181763	AC006059.1	NA	antisense
ENSG00000269896	31.5534	-0.648968	0.359364	0.00335225	0.0181831	AL513477.1	NA	transcribed_processed_pseudogene
ENSG00000254838	78.02	-0.379137	0.152477	0.00336187	0.0182231	GVINP1	NA	transcribed_unprocessed_pseudogene
ENSG00000259755	3.0186	-0.833613	0.427038	0.00339941	0.0183817	AC090907.2	NA	antisense
ENSG00000281195	122.97	0.454721	0.196815	0.00344046	0.0185586	AC007878.1	NA	lincRNA
ENSG00000272419	128.771	-0.287802	0.107613	0.00344477	0.0185778	LINC01145	NA	transcribed_unprocessed_pseudogene
ENSG00000272518	11.9977	0.474726	0.202849	0.00350302	0.0188132	AC036214.2	NA	sense_intronic
ENSG00000225345	227.182	0.490914	0.229884	0.00350605	0.0188207	SNX18P3	NA	transcribed_unprocessed_pseudogene
ENSG00000225793	6.94093	0.72611	0.405893	0.00352578	0.0189105	AL080250.1	NA	lincRNA
ENSG00000277013	3.49187	0.882118	0.768668	0.00354597	0.018998	AC008556.1	NA	lincRNA
ENSG00000223891	38.8426	-0.494911	0.224999	0.00354818	0.0190015	OSER1-DT	NA	lincRNA
ENSG00000277954	57.036	-0.481539	0.217415	0.00354771	0.0190015	AC092376.2	NA	antisense
ENSG00000248124	135.843	0.272043	0.102228	0.00355401	0.0190244	RRN3P1	NA	transcribed_unprocessed_pseudogene
ENSG00000264546	20.4306	0.490211	0.215215	0.00355656	0.0190339	AC008026.3	NA	sense_intronic
ENSG00000270504	19.568	0.596028	0.310063	0.00356415	0.019062	AL391422.4	NA	antisense
ENSG00000284556	8.89754	0.581692	0.272903	0.00359158	0.0191919	PRDX2P3	NA	processed_pseudogene
ENSG00000271976	51.5317	-0.345614	0.136245	0.00362265	0.0193411	AC012467.2	NA	antisense
ENSG00000279342	53.0409	0.435079	0.186218	0.0036394	0.0194263	AP000866.6	NA	sense_intronic
ENSG00000225217	26.08	0.442817	0.826816	0.00365177	0.0194795	HSPA7	NA	unprocessed_pseudogene
ENSG00000258072	2.06331	-1.12377	1.1279	0.00366773	0.0195349	AC126177.6	NA	processed_pseudogene
ENSG00000259826	17.4069	-0.494369	0.222406	0.00372501	0.019784	AC072061.1	NA	antisense
ENSG00000275898	2.92466	0.905766	0.632437	0.0037663	0.0199384	AC125603.4	NA	lincRNA
ENSG00000273148	10.8862	0.549265	0.251194	0.00378005	0.0199983	LINC00653	NA	lincRNA
ENSG00000231560	78.4081	0.483864	0.22468	0.00381293	0.0201417	CLEC12A-AS1	NA	lincRNA
ENSG00000228484	3.51071	0.145945	0.329702	0.00382054	0.0201645	AL137025.1	NA	lincRNA
ENSG00000181126	41.6186	0.61107	0.336356	0.00386028	0.0203304	HLA-V	NA	transcribed_unprocessed_pseudogene
ENSG00000213197	56.8371	0.577706	0.306678	0.00389563	0.0204857	AC012066.1	NA	processed_pseudogene
ENSG00000272515	15.536	-0.626571	0.354594	0.00392666	0.0206312	AL355578.1	NA	lincRNA
ENSG00000213842	13.4153	0.558406	0.270715	0.0039368	0.0206579	SUGT1P2	NA	processed_pseudogene
ENSG00000130612	21.5602	0.493019	0.22355	0.00394194	0.0206804	CYP2G1P	NA	transcribed_unprocessed_pseudogene
ENSG00000285871	4.51076	0.723769	0.402357	0.00395611	0.0207325	AL359844.1	NA	lincRNA
ENSG00000273369	2.66308	-0.926313	0.542286	0.00397956	0.0208331	AC096586.2	NA	antisense
ENSG00000272375	12.1783	-0.542406	0.255525	0.00401591	0.020999	AC026979.3	NA	lincRNA
ENSG00000285600	19.8925	-0.454152	0.200717	0.00401639	0.020999	AC023593.1	NA	antisense
ENSG00000186019	38.0974	-0.682841	0.486075	0.00403234	0.0210644	AC021092.1	NA	antisense
ENSG00000238035	62.07	0.505751	0.237171	0.00405194	0.0211487	AC138035.1	NA	lincRNA
ENSG00000245750	24.8548	0.660401	0.565394	0.00406518	0.0211974	DRAIC	NA	lincRNA
ENSG00000251602	26.2212	-0.360965	0.144816	0.0040656	0.0211974	AL928654.1	NA	antisense
ENSG00000281076	75.7925	-0.43649	0.193282	0.00411405	0.0213908	ZDHHC8P1	NA	transcribed_unprocessed_pseudogene
ENSG00000281335	3.66758	0.780168	0.421859	0.00411732	0.0214033	MIF-AS1	NA	antisense
ENSG00000259318	7.57972	0.62253	0.311501	0.00413334	0.0214652	AL356801.1	NA	processed_pseudogene
ENSG00000232024	34.8398	-0.600719	0.321287	0.00415213	0.0215293	LSM12P1	NA	processed_pseudogene
ENSG00000285533	5.26723	0.810058	0.557417	0.00415438	0.0215364	AP001362.2	NA	lincRNA
ENSG00000261315	6.32444	0.600442	0.29636	0.0042175	0.0217715	LARP4P	NA	transcribed_processed_pseudogene
ENSG00000285634	45.1775	0.723275	0.858851	0.00423174	0.0218128	AL583827.1	NA	lincRNA
ENSG00000255468	28.1711	0.50557	0.2378	0.00424405	0.0218638	AP001107.9	NA	antisense
ENSG00000265962	2.72168	-0.851226	0.55872	0.00425911	0.0219308	GACAT2	NA	antisense
ENSG00000274769	17.7249	0.604006	0.317381	0.00432253	0.0222012	AC016747.4	NA	processed_transcript
ENSG00000223774	20.5767	0.587779	0.853245	0.00433031	0.0222319	AL513217.1	NA	antisense
ENSG00000160766	102.792	-0.393435	0.168177	0.00434074	0.0222668	GBAP1	NA	transcribed_unprocessed_pseudogene
ENSG00000238741	807.794	0.369128	0.153686	0.00434261	0.0222717	SCARNA7	NA	scaRNA
ENSG00000254615	15.1589	-0.499775	1.12621	0.0043919	0.0224539	AC027031.2	NA	lincRNA
ENSG00000269900	3470.4	0.472557	0.228379	0.00441248	0.0225356	RMRP	NA	lincRNA
ENSG00000285918	14.7429	-0.624689	0.365215	0.00441838	0.0225516	AC092376.3	NA	antisense
ENSG00000254467	3.5137	-0.846141	0.527865	0.00443951	0.0226406	AP002765.1	NA	lincRNA
ENSG00000239650	7.4356	0.566876	0.275679	0.00446521	0.022729	GUSBP4	NA	transcribed_unprocessed_pseudogene
ENSG00000239828	9.32881	0.697309	0.773556	0.00448599	0.0228064	AC063944.1	NA	lincRNA
ENSG00000257511	10.8612	0.649231	0.394599	0.00449501	0.0228379	AC084824.1	NA	processed_pseudogene
ENSG00000259585	9.30677	0.644175	0.354875	0.0045148	0.02291	RBM17P4	NA	processed_pseudogene
ENSG00000206337	48.4867	0.535446	0.278164	0.00453415	0.0229747	HCP5	NA	sense_overlapping
ENSG00000245904	7.46554	0.730835	0.501784	0.00457442	0.0231549	AC025164.1	NA	antisense
ENSG00000237094	171.292	0.372374	0.156133	0.00458612	0.023195	AL732372.2	NA	transcribed_unprocessed_pseudogene
ENSG00000182487	4.48989	0.896249	0.712897	0.00463418	0.0233801	NCF1B	NA	transcribed_unprocessed_pseudogene
ENSG00000238057	14.3045	0.560084	0.283641	0.00463918	0.0233957	ZEB2-AS1	NA	antisense
ENSG00000213468	12.5928	0.657308	0.811507	0.00464221	0.0234013	FIRRE	NA	processed_transcript
ENSG00000232850	42.5855	0.394828	0.168684	0.00465528	0.0234382	AL590708.1	NA	lincRNA
ENSG00000237732	7.6631	-0.676557	0.426956	0.00465951	0.0234547	AC010980.1	NA	transcribed_unprocessed_pseudogene
ENSG00000280993	826.952	0.45398	0.214751	0.00468626	0.0235603	MUC20-OT1	NA	lincRNA
ENSG00000259129	158.753	0.383765	0.164133	0.00469447	0.0235967	LINC00648	NA	lincRNA
ENSG00000260257	122.691	-0.238781	0.0903039	0.00470692	0.0236447	AL035071.1	NA	lincRNA
ENSG00000228903	45.2487	-0.400407	0.171024	0.00476655	0.0238672	RASA4CP	NA	transcribed_unprocessed_pseudogene
ENSG00000215769	137.821	0.332541	0.135505	0.00477335	0.0238755	ARHGAP27P1-BPTFP1-KPNA2P3	NA	processed_transcript
ENSG00000285966	7.78072	-0.603327	0.32248	0.00478941	0.0239363	AC007686.4	NA	lincRNA
ENSG00000277952	3.0974	0.799978	1.0263	0.00483434	0.0241214	AC092745.3	NA	processed_pseudogene
ENSG00000197989	65.9577	0.402686	0.174751	0.00485066	0.0241881	SNHG12	NA	antisense
ENSG00000212694	82.692	0.39457	0.171859	0.00484995	0.0241881	LINC01089	NA	lincRNA
ENSG00000260000	11.6194	-0.525913	0.258469	0.00488015	0.0243005	AL133338.1	NA	antisense
ENSG00000257613	6.15229	0.27577	0.473533	0.00493107	0.0245092	LINC01481	NA	lincRNA
ENSG00000224888	17.7741	-0.520327	0.259492	0.00495247	0.0245806	AC138028.2	NA	antisense
ENSG00000273492	22.1313	-0.52325	0.264254	0.0049787	0.0246715	AP000229.1	NA	lincRNA
ENSG00000267247	3.11959	-0.85972	0.782523	0.0049825	0.0246796	AP005264.3	NA	lincRNA
ENSG00000226757	14.0177	-0.526434	0.262005	0.00498771	0.0247004	AC079341.1	NA	antisense
ENSG00000215039	127.555	0.370282	0.158219	0.00503962	0.0249107	CD27-AS1	NA	processed_transcript
ENSG00000231133	11.0877	-0.703358	0.61795	0.00504034	0.0249107	HAR1B	NA	lincRNA
ENSG00000272904	7.60017	0.703701	0.560421	0.00504859	0.0249414	AL390726.3	NA	processed_transcript
ENSG00000227908	17.3049	0.429151	0.191422	0.00506023	0.0249888	AC016596.1	NA	antisense
ENSG00000203875	27.0059	0.457622	0.710912	0.00507795	0.0250409	SNHG5	NA	processed_transcript
ENSG00000234911	14.2918	0.518431	0.257186	0.00507763	0.0250409	TEX21P	NA	transcribed_unitary_pseudogene
ENSG00000281650	345.316	0.464649	0.227613	0.0050991	0.0251351	AC243922.3	NA	processed_transcript
ENSG00000234769	11.0652	-0.670417	0.476799	0.00512833	0.0252538	WASH4P	NA	unprocessed_pseudogene
ENSG00000271147	101.529	-0.320893	0.131024	0.00513997	0.0252857	ARMCX5-GPRASP2	NA	processed_transcript
ENSG00000230852	12.6086	-0.610804	0.384153	0.00514339	0.0252974	AL161621.1	NA	lincRNA
ENSG00000233175	34.5899	-0.564102	0.334162	0.00514603	0.0253002	AC008105.1	NA	antisense
ENSG00000281160	36.9936	-0.561834	0.3247	0.0051513	0.0253159	AC018358.1	NA	antisense
ENSG00000282241	14.8891	-0.535988	0.276056	0.00516173	0.0253418	AL121839.4	NA	sense_intronic
ENSG00000204584	16.4767	0.595173	0.338581	0.00523781	0.0256536	FLJ45513	729220	antisense
ENSG00000161912	57.3282	0.558409	0.334688	0.00527255	0.0257811	ADCY10P1	NA	transcribed_unprocessed_pseudogene
ENSG00000231584	108.5	0.39767	0.177925	0.00530058	0.0258636	FAHD2CP	NA	transcribed_unprocessed_pseudogene
ENSG00000256667	23.7044	0.483182	0.233919	0.00533597	0.025999	KLRA1P	NA	transcribed_unprocessed_pseudogene
ENSG00000241362	2.1978	0.831012	0.617344	0.00534603	0.0260362	RPL36AP43	NA	processed_pseudogene
ENSG00000250138	34.2585	0.625407	0.430664	0.00536677	0.0261127	AC139495.3	NA	unprocessed_pseudogene
ENSG00000268836	3.68029	0.790324	0.531399	0.00537022	0.0261243	Z69706.1	NA	lincRNA
ENSG00000124549	11.0052	0.643221	0.4062	0.00541156	0.0263015	BTN2A3P	NA	transcribed_unprocessed_pseudogene
ENSG00000249176	2.50032	0.942515	0.66923	0.00541294	0.0263015	AC027801.2	NA	processed_pseudogene
ENSG00000237187	77.1473	-0.511154	0.267418	0.00542666	0.026357	NR2F1-AS1	NA	antisense
ENSG00000270147	2.83262	0.782423	0.57714	0.00543508	0.0263926	AC068620.2	NA	lincRNA
ENSG00000266340	133.962	0.248792	0.0964217	0.00544258	0.0264238	AC138207.7	NA	antisense
ENSG00000272645	122.318	0.426494	0.199032	0.00549674	0.0266101	GTF2IP20	NA	transcribed_unprocessed_pseudogene
ENSG00000245213	62.189	0.470984	0.23104	0.00550129	0.0266191	AC105285.1	NA	antisense
ENSG00000276975	950.918	0.348816	0.149155	0.00553967	0.0267467	HYDIN2	NA	transcribed_unprocessed_pseudogene
ENSG00000211689	8.05097	0.715378	0.544783	0.00554962	0.0267736	TRGC1	445347	TR_C_gene
ENSG00000262700	15.8182	0.563941	0.302308	0.00556401	0.0268113	AC133552.3	NA	processed_pseudogene
ENSG00000229425	91.3033	-0.53567	0.313043	0.0055723	0.0268407	AJ009632.2	101927745	lincRNA
ENSG00000229425	91.3033	-0.53567	0.313043	0.0055723	0.0268407	AJ009632.2	105369302	lincRNA
ENSG00000229847	727.711	0.406089	0.187195	0.00558572	0.0268894	EMX2OS	NA	antisense
ENSG00000260166	26.2388	-0.558967	0.324103	0.00559512	0.026903	AC134312.3	NA	lincRNA
ENSG00000274253	161.655	-0.375252	0.165438	0.00564341	0.027066	AC138649.1	NA	sense_overlapping
ENSG00000242889	4.30575	0.792174	0.666198	0.00564501	0.0270684	RN7SL449P	NA	misc_RNA
ENSG00000267586	7.98563	0.583453	0.322187	0.00566837	0.0271751	LINC00907	NA	lincRNA
ENSG00000234056	5.04633	0.218619	0.398769	0.00568308	0.0272243	LINC00463	NA	lincRNA
ENSG00000273247	101.017	0.315619	0.128464	0.00569918	0.0272854	AC097376.2	NA	antisense
ENSG00000227666	5.32058	0.646479	0.365425	0.0057157	0.0273485	CYCSP24	NA	processed_pseudogene
ENSG00000285755	3.27227	0.877521	0.714714	0.00571719	0.0273502	AC132153.1	NA	lincRNA
ENSG00000231999	20.1871	0.604738	0.416042	0.00572609	0.0273821	LRRC8C-DT	NA	antisense
ENSG00000275120	19.2213	0.617871	0.393727	0.00573627	0.0274168	AC048382.5	NA	antisense
ENSG00000185607	24.0248	0.567149	0.33268	0.00575102	0.0274798	ACTBP7	NA	processed_pseudogene
ENSG00000231856	13.4275	0.474062	0.228041	0.00580656	0.0276965	AL162377.1	NA	antisense
ENSG00000266378	3.19658	0.825303	0.809079	0.00581092	0.0277066	AC005224.3	NA	lincRNA
ENSG00000270040	26.9343	0.49712	0.252413	0.00586031	0.0278932	AL356055.1	NA	sense_intronic
ENSG00000175061	282.372	0.30134	0.123523	0.00586568	0.0279024	SNHG29	NA	processed_transcript
ENSG00000265735	311.52	0.512813	0.293058	0.00588313	0.0279691	RN7SL5P	NA	misc_RNA
ENSG00000251637	165.743	0.457073	0.223836	0.00590266	0.0280185	AP003716.1	NA	lincRNA
ENSG00000267904	14.4547	-0.386662	0.168288	0.00593043	0.0281231	AC024075.1	NA	sense_intronic
ENSG00000276794	123.805	0.47061	0.240796	0.00597587	0.0283111	AC108108.1	NA	transcribed_unprocessed_pseudogene
ENSG00000261329	31.945	0.541703	0.617612	0.00602697	0.0285201	AC016597.1	NA	antisense
ENSG00000256594	23.0537	0.55319	0.306575	0.00604237	0.0285763	AC010186.2	NA	transcribed_unprocessed_pseudogene
ENSG00000231754	8.60987	-0.626138	0.412199	0.00606169	0.0286458	AL512380.1	NA	lincRNA
ENSG00000275620	95.5901	0.566594	0.362206	0.00607309	0.0286939	AL121827.2	NA	antisense
ENSG00000259209	3.49857	0.770128	0.793023	0.00608587	0.0287377	AC004943.1	NA	antisense
ENSG00000231035	1.99911	0.937878	1.03133	0.00614895	0.0289964	RPL7L1P9	NA	processed_pseudogene
ENSG00000255980	4.64326	-0.653147	0.799495	0.00615307	0.0290086	AP000439.3	102724265	lincRNA
ENSG00000245573	83.8317	0.318224	0.133307	0.00616152	0.0290333	BDNF-AS	NA	processed_transcript
ENSG00000224003	42.0259	0.484681	0.248915	0.00616889	0.0290624	YES1P1	NA	processed_pseudogene
ENSG00000231663	4.61844	0.688494	0.440722	0.00618111	0.0291032	COA6-AS1	NA	antisense
ENSG00000235944	85.448	-0.321519	0.134918	0.00619092	0.0291382	ZNF815P	NA	transcribed_unprocessed_pseudogene
ENSG00000189423	58.715	0.439451	0.210921	0.00620445	0.0291776	USP32P3	NA	transcribed_unprocessed_pseudogene
ENSG00000214174	179.799	-0.300802	0.1245	0.00621377	0.0292008	AMZ2P1	NA	transcribed_unprocessed_pseudogene
ENSG00000276204	4.0647	0.788317	0.64795	0.00622101	0.0292236	BX005195.1	NA	processed_pseudogene
ENSG00000268903	10.9875	0.401909	0.74023	0.00629882	0.0295211	AL627309.6	NA	processed_pseudogene
ENSG00000228782	48.5896	0.404899	0.185862	0.00631098	0.0295668	MRPL45P2	NA	transcribed_unprocessed_pseudogene
ENSG00000258057	47.261	-0.439595	0.214327	0.00636027	0.0297351	BCDIN3D-AS1	NA	antisense
ENSG00000232748	12.284	0.541604	0.294493	0.00637017	0.0297644	AC135050.1	NA	lincRNA
ENSG00000236833	4.15811	0.725817	0.761471	0.00638647	0.029812	AC024560.1	NA	lincRNA
ENSG00000274585	156.54	0.33201	0.558745	0.00638575	0.029812	RNU2-1	NA	snRNA
ENSG00000204789	362.847	-0.503866	0.292112	0.00641192	0.0298826	ZNF204P	NA	processed_pseudogene
ENSG00000279317	5.92449	0.664209	0.432273	0.00641394	0.0298833	AC006994.2	NA	bidirectional_promoter_lncRNA
ENSG00000220848	24.7107	0.418665	0.192345	0.00641978	0.0298991	RPS18P9	NA	transcribed_processed_pseudogene
ENSG00000237654	2.65949	0.420981	0.794756	0.00649811	0.0301835	AP003025.1	NA	antisense
ENSG00000250802	934.501	0.376973	0.169827	0.00653779	0.0303276	ZBED3-AS1	NA	antisense
ENSG00000263989	2.03827	0.954332	0.761597	0.00656974	0.0304411	RN7SL615P	NA	misc_RNA
ENSG00000238198	14.825	0.351333	0.149657	0.00658041	0.030479	AL357055.3	NA	lincRNA
ENSG00000242338	17.2594	0.488247	0.245694	0.0066316	0.0306697	BMS1P4	NA	transcribed_unprocessed_pseudogene
ENSG00000284319	6.67801	-0.657098	0.445765	0.00665722	0.0307708	AC275454.2	NA	antisense
ENSG00000230583	5.4641	0.63679	0.388051	0.00666597	0.0307938	GTF2IRD1P1	NA	transcribed_unprocessed_pseudogene
ENSG00000273011	2.53073	0.992264	0.732639	0.00666598	0.0307938	AC092681.3	NA	lincRNA
ENSG00000234161	9.1077	0.619752	0.386527	0.00667796	0.0308434	PABPC5-AS1	NA	antisense
ENSG00000254897	7.56676	0.599382	0.354598	0.00671127	0.0309395	AP003035.1	NA	processed_pseudogene
ENSG00000286214	7211.04	-0.459539	0.24591	0.00672454	0.030982	AUXG01000058.1	NA	antisense
ENSG00000242615	24.8258	-0.4196	0.195691	0.00674624	0.0310501	AC022415.1	NA	transcribed_processed_pseudogene
ENSG00000278249	2131	0.26788	0.109422	0.00677887	0.0311917	SCARNA2	NA	scaRNA
ENSG00000220804	69.0667	0.351545	0.154966	0.00678973	0.0312182	LINC01881	NA	transcribed_unprocessed_pseudogene
ENSG00000251372	10.2902	0.190526	0.36006	0.00681966	0.0313147	LINC00499	NA	lincRNA
ENSG00000229618	25.872	-0.548999	0.323582	0.00685057	0.031437	AC011287.1	NA	lincRNA
ENSG00000276916	5.96647	0.546822	0.287898	0.00696202	0.0318548	AL442125.2	NA	sense_intronic
ENSG00000272121	5.2807	-0.655281	0.488826	0.00699615	0.0319692	AC006058.3	NA	lincRNA
ENSG00000159904	32.3177	-0.478853	0.255686	0.00704663	0.032144	ZNF890P	NA	transcribed_unprocessed_pseudogene
ENSG00000285841	2.74936	-0.810219	0.707311	0.00709484	0.0323236	AC005692.3	NA	lincRNA
ENSG00000236977	5.41704	0.660998	0.450042	0.00718103	0.0326252	ANKRD44-IT1	NA	sense_intronic
ENSG00000213189	9.74983	-0.0945905	0.292212	0.0072756	0.0329814	BTF3L4P2	NA	processed_pseudogene
ENSG00000243701	50.8831	0.473931	0.253663	0.00733217	0.0331519	DUBR	NA	lincRNA
ENSG00000270231	164.136	0.401617	0.192739	0.00738135	0.0333065	NBPF8	728841	transcribed_unprocessed_pseudogene
ENSG00000275131	973.744	0.407441	0.197599	0.0073991	0.033362	AC241952.1	NA	transcribed_unprocessed_pseudogene
ENSG00000270959	22.9771	0.433358	0.213836	0.00741151	0.0334057	LPP-AS2	NA	antisense
ENSG00000283078	18.1016	-0.328528	0.140623	0.00742693	0.0334629	AL137077.2	NA	lincRNA
ENSG00000224238	90.0879	0.376541	0.173401	0.00749323	0.033712	WARS2-IT1	NA	antisense
ENSG00000231185	17.2829	-0.414888	0.603866	0.00750318	0.0337319	SPRY4-AS1	NA	antisense
ENSG00000259065	6.20984	0.0790742	0.286721	0.0075029	0.0337319	AC005520.2	NA	antisense
ENSG00000224715	4.64955	0.663474	0.557545	0.00756987	0.033936	Z82186.1	NA	lincRNA
ENSG00000225177	13.1963	0.605122	0.405363	0.00768504	0.034334	AL590617.2	NA	antisense
ENSG00000274712	134.002	0.293995	0.124773	0.00770164	0.0343842	AC005332.4	NA	lincRNA
ENSG00000282493	4.28689	0.634688	0.390834	0.00773549	0.034514	AC100810.5	NA	lincRNA
ENSG00000232117	8.15599	0.549367	0.313058	0.00776534	0.034618	LINC00384	NA	lincRNA
ENSG00000283106	55.2224	0.361487	0.166109	0.00780882	0.0347613	ZNF436-AS1	NA	antisense
ENSG00000243024	12.1183	0.472625	0.243206	0.00781391	0.0347713	AC012158.1	NA	transcribed_processed_pseudogene
ENSG00000255717	51.8451	0.499734	0.274961	0.00785562	0.0349061	SNHG1	NA	processed_transcript
ENSG00000282518	11.7893	-0.337261	0.570909	0.00786055	0.0349096	AC240565.4	NA	lincRNA
ENSG00000215223	8.88317	0.594986	0.384243	0.00787034	0.0349316	CYP51A1P3	NA	processed_pseudogene
ENSG00000235033	9.78013	0.609004	0.432419	0.00790803	0.0350499	AL590999.1	NA	antisense
ENSG00000242094	33.3983	0.420855	0.207514	0.00793022	0.0351144	FOXP1-IT1	NA	sense_intronic
ENSG00000285335	3.31898	0.747828	0.9249	0.00797485	0.0352503	CACNA1C-AS1	NA	antisense
ENSG00000198590	12.3201	0.484299	0.257236	0.00798973	0.0352978	C3orf35	339883	processed_transcript
ENSG00000175611	49.9783	0.326736	0.142385	0.00800215	0.0353288	LINC00476	NA	lincRNA
ENSG00000272157	9.10329	-0.526754	0.626764	0.00801303	0.0353425	AC107373.2	NA	antisense
ENSG00000259891	96.3609	0.406457	0.203544	0.00808404	0.0355916	AC107375.1	NA	antisense
ENSG00000237153	2.4084	0.823005	0.631665	0.00811331	0.0356627	AL162725.2	NA	lincRNA
ENSG00000223764	6.31719	0.64117	0.639872	0.00814447	0.0357612	LINC02593	NA	lincRNA
ENSG00000277425	3.9591	0.69756	0.603252	0.00821419	0.0359705	AL121890.4	NA	lincRNA
ENSG00000282943	21.9299	0.501606	0.286022	0.00824738	0.0360771	AC004784.1	NA	antisense
ENSG00000219433	4.83602	0.633648	0.445135	0.00825077	0.0360799	BTBD10P2	NA	processed_pseudogene
ENSG00000253161	6.35898	-0.571804	0.353365	0.00826028	0.0360868	LINC01605	NA	lincRNA
ENSG00000260625	6.76042	0.464935	0.231065	0.00826545	0.0360868	AC026471.2	NA	antisense
ENSG00000196922	387.354	-0.231639	0.0946925	0.00826936	0.0360959	ZNF252P	NA	transcribed_unprocessed_pseudogene
ENSG00000275830	6.12871	0.597909	0.685696	0.00829039	0.0361748	AL355974.2	NA	lincRNA
ENSG00000205853	2.96841	0.233239	0.42664	0.00830759	0.0362164	RFPL3S	NA	lincRNA
ENSG00000270165	2.20514	0.736044	0.835427	0.00830881	0.0362164	AC010530.1	NA	sense_intronic
ENSG00000240869	14.0633	0.566168	0.344544	0.00831433	0.0362211	RN7SL128P	NA	misc_RNA
ENSG00000273002	6.30854	0.638135	0.676326	0.00832227	0.0362364	AL355388.2	NA	antisense
ENSG00000180539	15.9435	0.548193	0.577632	0.00833262	0.036275	C9orf139	401563	antisense
ENSG00000272758	18.5765	0.430235	0.215098	0.00839591	0.0364727	AC083798.2	NA	antisense
ENSG00000284968	27.9822	0.416459	0.207128	0.00846815	0.0367343	AC093827.4	NA	antisense
ENSG00000235760	5.76806	0.595304	0.373372	0.00848791	0.036781	AC138655.1	NA	antisense
ENSG00000260464	57.6194	-0.360436	0.169181	0.00852851	0.0369307	AL049796.1	NA	bidirectional_promoter_lncRNA
ENSG00000262903	8.62166	0.602527	0.467924	0.00861023	0.0371794	AC027796.4	NA	antisense
ENSG00000277741	2.2212	0.328376	0.576459	0.00866671	0.0373903	GOLGA6L17P	NA	transcribed_unprocessed_pseudogene
ENSG00000270878	3.63269	0.639593	0.403188	0.00867619	0.0374221	AL136038.4	NA	processed_pseudogene
ENSG00000235180	12.999	0.564785	0.388283	0.00868138	0.0374272	LINC00601	NA	lincRNA
ENSG00000229623	6.89825	0.508841	0.271306	0.00868473	0.037435	METTL21AP1	NA	processed_pseudogene
ENSG00000241570	19.3441	-0.411491	0.202876	0.008693	0.0374474	PAQR9-AS1	NA	antisense
ENSG00000233517	3.61968	0.661227	0.550722	0.0087356	0.0376013	AC005162.2	NA	antisense
ENSG00000260565	289.595	0.379374	0.180457	0.00877857	0.0377465	ERVK13-1	NA	processed_transcript
ENSG00000232282	6.05162	0.579577	0.392168	0.00878645	0.0377671	MTND1P32	NA	processed_pseudogene
ENSG00000236268	4.11357	-0.110129	0.301943	0.00881063	0.0378444	LINC01361	NA	lincRNA
ENSG00000242622	77.9821	0.361174	0.169048	0.00887615	0.0380709	AC092910.3	NA	lincRNA
ENSG00000261193	3.70852	-0.6664	0.586535	0.00890983	0.0382017	AC134312.4	NA	lincRNA
ENSG00000231439	3.58541	-0.686116	0.484431	0.00895536	0.038345	WASIR2	NA	lincRNA
ENSG00000238045	6.48138	0.597802	0.44101	0.00895388	0.038345	AC009133.1	NA	antisense
ENSG00000230490	2.04253	0.606543	1.25516	0.00897416	0.0383986	AL139383.1	NA	lincRNA
ENSG00000268628	7.63744	0.534931	0.314675	0.00897814	0.0384022	AL121761.1	NA	lincRNA
ENSG00000244738	9.4983	0.575523	0.444613	0.00898698	0.0384132	AC026316.3	NA	sense_intronic
ENSG00000235698	5.12738	0.615764	0.420168	0.009015	0.0385072	PA2G4P2	NA	processed_pseudogene
ENSG00000230001	4.21174	0.628763	0.614979	0.00909813	0.0387732	AL359095.1	NA	sense_intronic
ENSG00000257674	2.38108	0.690867	0.78376	0.00921461	0.0392081	AC020629.1	NA	processed_pseudogene
ENSG00000242020	2.91425	0.749288	0.64194	0.00922993	0.0392529	RN7SL68P	NA	misc_RNA
ENSG00000229625	14.1999	-0.49947	0.292513	0.00923856	0.0392691	AC016877.1	NA	lincRNA
ENSG00000233223	12.1293	0.499826	0.278159	0.00923628	0.0392691	AC016876.1	NA	antisense
ENSG00000235954	83.0743	0.446573	0.247269	0.00923822	0.0392691	TTC28-AS1	NA	processed_transcript
ENSG00000266990	18.8216	0.372545	0.175474	0.0092474	0.0392999	AC004528.1	NA	antisense
ENSG00000271204	145.307	0.412217	0.211979	0.00925045	0.039306	AC016831.5	NA	lincRNA
ENSG00000198237	130.992	0.456282	0.268865	0.00925976	0.0393387	AC131392.1	NA	unprocessed_pseudogene
ENSG00000225877	35.788	0.536627	0.410095	0.00931155	0.0395039	PSG8-AS1	NA	lincRNA
ENSG00000272983	120.516	0.329095	0.14938	0.00934339	0.0395841	AL117339.4	NA	lincRNA
ENSG00000272754	6.9612	0.555983	0.334694	0.0093753	0.0396986	AL133245.1	NA	lincRNA
ENSG00000270019	12.514	0.476599	0.260092	0.00938203	0.0397111	AC110769.2	NA	lincRNA
ENSG00000214313	2.29395	0.208717	0.394409	0.00944647	0.0398896	AZGP1P1	NA	transcribed_unprocessed_pseudogene
ENSG00000261572	6.46469	-0.565685	0.355018	0.00948797	0.0400293	AC097639.1	NA	sense_intronic
ENSG00000225648	112.514	0.284137	0.123944	0.00951724	0.0401032	SBDSP1	NA	transcribed_unprocessed_pseudogene
ENSG00000249485	20.3296	0.37984	0.180252	0.00954098	0.0401778	RBBP4P1	NA	processed_pseudogene
ENSG00000274184	10.4893	0.5432	0.582808	0.00958748	0.0402905	AC011815.2	NA	lincRNA
ENSG00000270164	3.94218	0.608512	0.710523	0.00969909	0.0406995	LINC01480	NA	lincRNA
ENSG00000234336	30.679	-0.491445	0.315911	0.00972296	0.0407758	JAZF1-AS1	NA	antisense
ENSG00000267481	27.4686	0.377789	0.182928	0.00974281	0.040845	AC011477.2	NA	sense_intronic
ENSG00000224116	22.1313	-0.532798	0.527985	0.00980703	0.041037	INHBA-AS1	NA	antisense
ENSG00000273654	6.55228	0.308548	0.500559	0.00984116	0.0411306	AC020904.2	NA	transcribed_processed_pseudogene
ENSG00000230454	24.1316	0.429187	0.223527	0.0098698	0.0412288	U73166.1	NA	lincRNA
ENSG00000231697	11.8577	0.43014	0.219026	0.00987837	0.0412438	NANOGP5	NA	transcribed_processed_pseudogene
ENSG00000232587	21.3947	0.444139	0.237456	0.00989964	0.0412946	EEF1A1P3	NA	processed_pseudogene
ENSG00000283025	8.34529	-0.53822	0.347434	0.00991272	0.0413168	AC027045.3	NA	antisense
ENSG00000271843	4.21418	0.596646	0.408152	0.0100453	0.0417982	AC012557.1	NA	lincRNA
ENSG00000236411	5.55729	-0.616507	0.478083	0.0100565	0.0418233	NDUFAF4P3	NA	processed_pseudogene
ENSG00000255624	5.01355	-0.557478	0.339982	0.0100988	0.0419639	AC073585.1	NA	transcribed_processed_pseudogene
ENSG00000257702	3.20212	0.232255	0.407417	0.0101132	0.0420091	LBX2-AS1	NA	antisense
ENSG00000283415	18.2953	-0.504618	0.30825	0.010129	0.0420463	AC087280.2	NA	lincRNA
ENSG00000260141	18.7804	0.470334	0.267639	0.010327	0.0426944	AC145350.2	NA	lincRNA
ENSG00000186056	26.1688	0.503546	0.495973	0.0103549	0.042774	MATN1-AS1	NA	antisense
ENSG00000277199	8.07902	-0.546933	0.396554	0.0104064	0.0429143	LINC01632	NA	lincRNA
ENSG00000237711	5.81058	0.569493	0.380097	0.0104243	0.042973	MTCO3P11	NA	unprocessed_pseudogene
ENSG00000265713	14.8663	0.422331	0.218703	0.0104266	0.042973	AC023389.2	NA	transcribed_processed_pseudogene
ENSG00000282855	3.73918	0.619738	0.547576	0.0104501	0.043051	AC093591.3	NA	processed_pseudogene
ENSG00000249363	3.14976	0.65565	0.494454	0.010476	0.0431285	AC011411.1	NA	processed_pseudogene
ENSG00000224402	65.1803	0.320239	0.147574	0.0105471	0.0433629	OR6D1P	NA	transcribed_unitary_pseudogene
ENSG00000232164	657.668	0.418832	0.229099	0.0106011	0.0435265	LINC01873	NA	lincRNA
ENSG00000173209	558.635	0.442755	0.258622	0.0106566	0.043713	AHSA2P	NA	transcribed_unitary_pseudogene
ENSG00000257298	19.5239	0.472672	0.267488	0.0106849	0.0437895	AC008147.2	NA	sense_intronic
ENSG00000125804	81.6791	0.411905	0.218645	0.0107005	0.0438315	FAM182A	NA	processed_transcript
ENSG00000267436	3.3102	0.62161	0.572217	0.0107126	0.0438511	AC005786.3	NA	antisense
ENSG00000266456	9.56535	-0.534203	0.395821	0.0108295	0.0441973	AP001178.3	NA	antisense
ENSG00000282457	25.3682	-0.272786	0.443152	0.0108403	0.0442265	CSPG4P10	NA	transcribed_unprocessed_pseudogene
ENSG00000226314	64.0713	0.422945	0.226068	0.0108586	0.0442867	ZNF192P1	NA	transcribed_unprocessed_pseudogene
ENSG00000240474	5.43381	0.599858	0.554841	0.0108713	0.0442984	RN7SL116P	NA	misc_RNA
ENSG00000249212	17.9685	0.477554	0.272697	0.0108829	0.0443266	ATP1B1P1	NA	unprocessed_pseudogene
ENSG00000285368	2.72491	0.409307	0.830949	0.0109179	0.0444469	RPL10P19	NA	transcribed_processed_pseudogene
ENSG00000234504	2.97232	0.635553	0.66001	0.0109211	0.0444505	AL353801.2	NA	antisense
ENSG00000231615	21.5291	0.510559	0.338749	0.0109338	0.044479	AL645568.2	NA	processed_pseudogene
ENSG00000285454	6.05964	-0.571479	0.423017	0.0109356	0.044479	AC111006.1	NA	lincRNA
ENSG00000255062	4.0202	-0.35923	0.620203	0.0109504	0.0445199	AP001318.2	NA	antisense
ENSG00000250615	2.58549	0.607806	0.753065	0.0109604	0.0445457	AC008581.1	NA	antisense
ENSG00000248942	2.74006	-0.72365	0.691865	0.0109751	0.0445767	LINC01335	NA	lincRNA
ENSG00000247708	42.6238	0.445282	0.245751	0.0110008	0.0446506	STX18-AS1	NA	antisense
ENSG00000271452	15.5364	-0.482378	0.291933	0.0110198	0.0447056	AC005034.5	NA	sense_intronic
ENSG00000214626	7.86979	0.509135	0.304239	0.0110357	0.0447629	POLR3DP1	NA	processed_pseudogene
ENSG00000266754	6.42509	0.535252	0.347992	0.0110551	0.044801	RN7SL524P	NA	misc_RNA
ENSG00000282727	52.727	0.44221	0.258005	0.0110598	0.044801	AC244207.2	NA	lincRNA
ENSG00000275064	3.90465	0.579438	0.591773	0.0110895	0.0448989	AC239860.1	NA	unprocessed_pseudogene
ENSG00000276127	3.3266	0.584854	0.829653	0.0111035	0.0449337	AL589935.2	NA	processed_pseudogene
ENSG00000266066	2.68173	-0.602825	0.735867	0.0111122	0.0449462	POLRMTP1	NA	processed_pseudogene
ENSG00000247271	9.44845	0.462186	0.255141	0.0111164	0.0449486	ZBED5-AS1	NA	antisense
ENSG00000260196	49.7517	-0.465111	0.289489	0.0111266	0.0449823	AC124798.1	NA	antisense
ENSG00000241416	10.0519	0.375824	0.572947	0.0111361	0.0450058	KRT8P13	NA	processed_pseudogene
ENSG00000285744	6.51395	0.573764	0.563701	0.0111855	0.045161	AC083837.1	NA	bidirectional_promoter_lncRNA
ENSG00000271892	8.26503	-0.545586	0.532276	0.0112096	0.0452281	AC026790.1	NA	lincRNA
ENSG00000284534	5.15065	0.538829	0.338644	0.0112152	0.0452434	AC092634.8	NA	processed_transcript
ENSG00000283352	36.2094	0.319148	0.147635	0.01124	0.0453061	AL021368.4	NA	processed_transcript
ENSG00000259953	106.305	-0.427559	0.249782	0.011296	0.0454571	AL138756.1	NA	sense_overlapping
ENSG00000202538	10.9804	0.550477	0.472266	0.0113234	0.0455124	RNU4-2	NA	snRNA
ENSG00000232118	2.99035	0.611042	0.593053	0.0113313	0.0455124	BACH1-AS1	NA	lincRNA
ENSG00000258441	1458.17	-0.246043	0.107514	0.01133	0.0455124	LINC00641	NA	processed_transcript
ENSG00000283217	2.10454	-0.167734	0.345621	0.0113321	0.0455124	AC068205.1	NA	lincRNA
ENSG00000272909	44.3584	0.321425	0.150237	0.0113423	0.0455434	AL122035.2	NA	antisense
ENSG00000228166	5.73094	0.524399	0.348136	0.0113644	0.0456122	MTND1P11	NA	unprocessed_pseudogene
ENSG00000282851	19.7736	0.498408	0.344364	0.0113848	0.0456568	BISPR	NA	lincRNA
ENSG00000271699	17.4037	0.536968	0.489184	0.0113883	0.0456634	SNX29P2	NA	transcribed_unprocessed_pseudogene
ENSG00000234323	7.67045	0.549458	0.48739	0.011714	0.046671	LINC01505	NA	lincRNA
ENSG00000233016	56.6383	0.405331	0.219255	0.0117772	0.0469074	SNHG7	NA	antisense
ENSG00000253857	5.79743	-0.561072	0.54364	0.0117805	0.0469089	AC022679.1	NA	lincRNA
ENSG00000272927	6.88201	0.50387	0.304273	0.0118417	0.047065	AC107464.3	NA	antisense
ENSG00000227671	118.133	0.310402	0.1453	0.0118575	0.0471041	AL390728.4	NA	transcribed_unprocessed_pseudogene
ENSG00000237249	2.06308	-0.828923	0.844053	0.0118593	0.0471041	Z99127.3	NA	processed_pseudogene
ENSG00000259969	56.7312	-0.309365	0.145086	0.0119383	0.0473642	AL049838.1	NA	sense_overlapping
ENSG00000273847	149.344	0.435146	0.261891	0.0119529	0.0474068	AC139494.2	NA	lincRNA
ENSG00000177640	103.373	0.257821	0.114327	0.0119913	0.0475132	CASC2	NA	antisense
ENSG00000241490	3.98281	0.549436	0.352253	0.0120307	0.047592	AC093010.2	NA	antisense
ENSG00000234801	3.60499	0.596602	0.591269	0.012035	0.0476014	MORF4	NA	processed_pseudogene
ENSG00000244257	165.831	0.168572	0.33326	0.0121381	0.0479487	PKD1P1	NA	unprocessed_pseudogene
ENSG00000285867	7.53721	0.536358	0.363027	0.0121385	0.0479487	BX470102.2	NA	lincRNA
ENSG00000281487	91.7529	-0.0390538	0.273758	0.0121933	0.0481495	AC139677.4	NA	processed_pseudogene
ENSG00000233654	49.9858	0.26048	0.115027	0.0121984	0.0481621	AC108047.1	NA	antisense
ENSG00000242288	9.31643	0.340981	0.532194	0.0122074	0.0481837	AC022400.3	NA	processed_transcript
ENSG00000267365	28.4472	0.477018	0.326039	0.0122652	0.0483908	KCNJ2-AS1	NA	antisense
ENSG00000232485	2.57437	0.235961	0.42414	0.0122776	0.0484159	AC098820.1	NA	processed_transcript
ENSG00000224505	4.84633	0.383848	0.647762	0.0122824	0.0484233	AC138150.1	NA	antisense
ENSG00000275632	4.05986	-0.577124	0.410986	0.0122946	0.0484482	AL035461.2	NA	lincRNA
ENSG00000228203	39.3362	-0.38328	0.2007	0.0123084	0.0484634	RNF144A-AS1	NA	processed_transcript
ENSG00000225693	4.62173	0.416219	0.663549	0.0123244	0.0484952	LAGE3P1	NA	processed_pseudogene
ENSG00000263648	7.8545	0.535902	0.37487	0.0123325	0.0485114	AC005244.1	NA	processed_pseudogene
ENSG00000272140	40.9866	0.366502	0.184283	0.0123403	0.04853	AC022400.6	NA	lincRNA
ENSG00000244055	25.8502	0.486125	0.372461	0.0123688	0.0485919	AC007566.1	NA	antisense
ENSG00000254035	7.25497	-0.49774	0.315937	0.012368	0.0485919	AC104117.3	NA	antisense
ENSG00000228328	9.95826	0.522585	0.394038	0.0123713	0.048594	AL158201.1	NA	processed_pseudogene
ENSG00000204588	324.837	-0.473901	0.356984	0.012391	0.0486322	LINC01123	NA	lincRNA
ENSG00000259976	194.411	0.516012	0.393803	0.0123979	0.0486517	AC093010.3	NA	3prime_overlapping_ncRNA
ENSG00000268061	11.017	0.50392	0.523611	0.0124384	0.0487621	NAPA-AS1	NA	antisense
ENSG00000285831	4.00026	0.563246	0.503702	0.0124419	0.0487621	AC027329.1	NA	lincRNA
ENSG00000277020	7.30892	0.217484	0.385515	0.0124828	0.048875	AL590096.1	NA	antisense
ENSG00000239467	2.24754	0.36113	0.641667	0.0124946	0.0489054	AC007405.3	285141	lincRNA
ENSG00000206344	17.5456	0.430431	0.241007	0.0125998	0.0492385	HCG27	NA	lincRNA
ENSG00000233622	8.86587	0.493832	0.312689	0.0126066	0.0492495	CYP2T1P	NA	transcribed_unitary_pseudogene
ENSG00000224425	2.2989	-0.519192	0.79561	0.012617	0.0492665	AC073869.2	NA	processed_pseudogene
ENSG00000233008	17.6975	0.480729	0.316349	0.0126563	0.0493674	LINC01725	NA	lincRNA
ENSG00000281951	5.39363	0.389585	0.594026	0.012655	0.0493674	AC093627.11	NA	processed_transcript
ENSG00000278911	9.41822	-0.514137	0.436347	0.0126865	0.0494511	AC015819.3	NA	processed_transcript
ENSG00000224795	59.8751	0.473513	0.368522	0.0126968	0.0494753	NTM-AS1	NA	lincRNA
ENSG00000207955	127.605	0.458655	0.351804	0.0127244	0.0495515	AL359091.1	NA	lincRNA
ENSG00000214108	7.50118	0.531746	0.418418	0.0127572	0.0496396	TPT1P5	NA	processed_pseudogene
ENSG00000260816	29.8064	0.414378	0.230307	0.0128172	0.0498461	AC027279.1	NA	sense_intronic
ENSG00000270091	19.8013	-0.418898	0.23453	0.0128256	0.0498584	AC015726.1	NA	lincRNA
ENSG00000170919	272.248	0.324913	0.157837	0.0128396	0.0498933	TPT1-AS1	NA	processed_transcript
ENSG00000264176	2.54911	0.321895	0.578526	0.0128498	0.0499205	MAGOH2P	NA	transcribed_processed_pseudogene

## Sheet: COVID vs ICUVENT
ensembl_gene_id	baseMean	log2FoldChange	lfcSE	pvalue	padj	external_gene_name	entrezgene	gene_biotype
ENSG00000277027	3098.6	3.19727	0.417696	3.54262e-16	4.34148e-12	RMRP	NA	ribozyme
ENSG00000200488	782.249	2.01483	0.36283	6.31362e-10	2.21067e-06	RN7SKP203	NA	misc_RNA
ENSG00000263740	4601.99	3.12395	0.458829	1.76754e-07	0.000296143	RN7SL4P	NA	misc_RNA
ENSG00000200312	9.55778	2.40212	0.617785	1.96714e-06	0.00164081	RN7SKP255	NA	misc_RNA
ENSG00000268069	16.9399	1.02319	0.26106	2.62255e-06	0.00191309	AC004466.1	NA	antisense
ENSG00000244398	255.533	0.767895	0.203316	4.62513e-06	0.00263632	AC116533.1	NA	processed_pseudogene
ENSG00000256982	33.2702	-1.29173	0.330815	5.16564e-06	0.00281355	AC135782.1	NA	lincRNA
ENSG00000226356	9.06957	-0.983547	0.260169	6.98308e-06	0.00296835	RPS6P20	NA	unprocessed_pseudogene
ENSG00000262877	37.4027	1.58073	0.44533	8.3313e-06	0.00314154	AC110285.2	NA	lincRNA
ENSG00000204241	55.7577	-1.24756	0.339357	1.20906e-05	0.00400459	AP000911.1	NA	lincRNA
ENSG00000266844	18.3408	3.94558	0.704375	1.37094e-05	0.00430791	AC093330.1	NA	antisense
ENSG00000285883	31.1444	-1.05731	0.297258	1.74808e-05	0.0048688	AC123784.1	NA	lincRNA
ENSG00000237250	4.32924	-7.49841e-06	0.0014427	1.93235e-05	0.00492242	AL359924.1	NA	antisense
ENSG00000250182	21.4224	1.45483	0.442134	2.0438e-05	0.00492242	EEF1A1P13	NA	processed_pseudogene
ENSG00000251660	267.445	1.80262	0.548327	1.85595e-05	0.00492242	AC007036.3	NA	sense_overlapping
ENSG00000233476	11.1354	2.3957	0.75474	2.11146e-05	0.00497614	EEF1A1P6	NA	processed_pseudogene
ENSG00000273715	8.6364	7.88117e-07	0.0014427	2.19634e-05	0.0050889	AC138827.1	NA	transcribed_unprocessed_pseudogene
ENSG00000276398	10.5033	2.6576	0.897093	2.34708e-05	0.00513634	RF01970	NA	misc_RNA
ENSG00000228206	4.59364	-2.04923e-05	0.00144276	2.57707e-05	0.00524609	AC016717.1	NA	processed_pseudogene
ENSG00000247796	9.66227	1.95015e-06	0.0014427	2.58964e-05	0.00524609	AC008966.1	NA	antisense
ENSG00000260953	7.02408	-8.71975e-06	0.0014427	2.62953e-05	0.00525403	AC009093.4	NA	lincRNA
ENSG00000231439	5.43517	-9.9777e-06	0.00144271	3.42157e-05	0.00625841	WASIR2	NA	lincRNA
ENSG00000172965	34.5178	-0.842907	0.253149	3.54052e-05	0.00638901	MIR4435-2HG	NA	lincRNA
ENSG00000284610	66.2578	-2.51737e-05	0.00144278	6.04466e-05	0.00866401	AC107918.4	NA	transcribed_unprocessed_pseudogene
ENSG00000231584	118.881	0.83718	0.279408	6.79556e-05	0.009214	FAHD2CP	NA	transcribed_unprocessed_pseudogene
ENSG00000203930	82413.1	1.02655	0.28541	7.02671e-05	0.00936003	LINC00632	NA	antisense
ENSG00000231013	8.08845	-9.59164e-06	0.0014427	7.98628e-05	0.00998693	AC013275.1	NA	antisense
ENSG00000235903	109.625	1.05227	0.362193	8.35945e-05	0.0102318	CPB2-AS1	NA	antisense
ENSG00000268051	11.6272	-0.766466	0.256439	0.000105619	0.0114545	AC008395.1	NA	sense_intronic
ENSG00000257585	16.3871	1.81952	0.66852	0.000107237	0.0115778	LINC00609	NA	lincRNA
ENSG00000204188	2.20778	-2.65237	0.892839	0.000112983	0.0118807	GGNBP1	NA	transcribed_unitary_pseudogene
ENSG00000269968	5.24936	1.71592	0.581851	0.000113427	0.0118807	AC006064.4	NA	antisense
ENSG00000248508	42.4627	1.19838	0.439168	0.000128399	0.0124839	SRP14-AS1	NA	bidirectional_promoter_lncRNA
ENSG00000272941	11.0585	1.50851	0.547272	0.000127166	0.0124839	AC083862.2	NA	antisense
ENSG00000272888	596.59	0.442323	0.158824	0.000144591	0.0132776	LINC01578	NA	processed_transcript
ENSG00000283183	49.2419	-1.34822e-06	0.00144266	0.000151166	0.0135442	AC116565.1	NA	lincRNA
ENSG00000263278	51.7976	-1.33455e-05	0.00144271	0.000157474	0.013624	AC233701.1	NA	sense_intronic
ENSG00000255929	14.0806	-0.85943	0.305432	0.000168777	0.0140186	AP000943.3	NA	antisense
ENSG00000271270	81.4968	-0.994985	0.351409	0.000195365	0.0151532	TMCC1-AS1	NA	antisense
ENSG00000235760	6.22295	1.07306	0.40866	0.000203336	0.0156722	AC138655.1	NA	antisense
ENSG00000214381	5.62838	-9.34575e-06	0.0014427	0.000209384	0.0157908	LINC00488	NA	processed_transcript
ENSG00000214369	5.04776	-1.12733e-05	0.0014427	0.000223296	0.0164354	AC009967.1	NA	processed_pseudogene
ENSG00000223930	34.6716	-1.2081e-05	0.00144271	0.000235475	0.0168527	AC117453.1	NA	antisense
ENSG00000266306	2.60849	-9.25444e-06	0.0014427	0.000238604	0.0169053	AC061975.5	NA	unprocessed_pseudogene
ENSG00000234688	4.5042	-1.0998e-05	0.0014427	0.000251219	0.0172828	AL049749.1	NA	antisense
ENSG00000284456	4.58497	-8.42228e-06	0.0014427	0.000251732	0.0172828	LINC02076	NA	lincRNA
ENSG00000163364	24.3077	-0.742646	0.275432	0.000265015	0.0176509	LINC01116	NA	lincRNA
ENSG00000215875	6.04688	-1.08933e-05	0.0014427	0.000264475	0.0176509	ST13P20	NA	transcribed_processed_pseudogene
ENSG00000240207	90.7456	-0.768134	0.282128	0.000274674	0.0180975	AC080013.1	NA	antisense
ENSG00000207955	136.398	1.1898	0.50819	0.000335388	0.0204486	AL359091.1	NA	lincRNA
ENSG00000223797	38.6219	0.673835	0.278238	0.000353715	0.0210426	ENTPD3-AS1	NA	antisense
ENSG00000241416	10.4566	1.64409	0.724111	0.000368762	0.021611	KRT8P13	NA	processed_pseudogene
ENSG00000277873	7.71855	-0.83761	0.335995	0.000369639	0.021611	AC131159.2	NA	antisense
ENSG00000237973	92.1485	-3.42368	0.587943	0.000372348	0.0216154	MTCO1P12	NA	unprocessed_pseudogene
ENSG00000251046	13.5642	-1.22756e-05	0.0014427	0.000373045	0.0216154	ZNF969P	NA	processed_pseudogene
ENSG00000259342	27.0339	-0.594877	0.234354	0.000374722	0.0216614	AC025580.1	NA	antisense
ENSG00000236948	3.85155	-7.63759e-06	0.0014427	0.000386464	0.0221314	AL365255.1	NA	lincRNA
ENSG00000212402	28.5611	1.21422	0.544417	0.000400974	0.0224936	SNORA74B	NA	snoRNA
ENSG00000242960	3.87469	1.29016	0.539092	0.000404363	0.0225647	FTH1P23	NA	processed_pseudogene
ENSG00000219392	13.8678	1.69953	0.798776	0.000428109	0.0234218	ZNF602P	NA	unprocessed_pseudogene
ENSG00000267270	43.9333	-1.10164	0.43383	0.000441285	0.0238762	PARD6G-AS1	NA	antisense
ENSG00000245293	287.336	1.42549	0.664948	0.000446164	0.024034	AC096564.1	NA	antisense
ENSG00000278012	5.30594	-9.87689e-06	0.0014427	0.000458838	0.0246086	AL031658.2	NA	sense_intronic
ENSG00000254921	2.60978	-7.02117e-06	0.0014427	0.000461134	0.0246239	AC116456.1	NA	antisense
ENSG00000253716	9.05743	0.927798	0.392082	0.000463058	0.0246729	MINCR	NA	antisense
ENSG00000232533	14.1819	-0.532046	0.222993	0.000476753	0.0251042	AC093673.1	NA	antisense
ENSG00000253807	4.34814	1.31774	0.553741	0.000476782	0.0251042	LINC01170	NA	lincRNA
ENSG00000224184	3.92362	-8.96081e-06	0.0014427	0.000481467	0.0252153	MIR3681HG	NA	lincRNA
ENSG00000183308	17.3696	-0.717539	0.292998	0.000490137	0.0253444	AC005037.1	NA	antisense
ENSG00000215158	240.876	0.895939	0.40698	0.000500234	0.0255965	AC138409.2	NA	transcribed_unprocessed_pseudogene
ENSG00000260664	319.091	0.438954	0.193027	0.000524892	0.0264714	AC004158.1	NA	lincRNA
ENSG00000236953	3.28142	1.30486	0.561633	0.000536362	0.0265988	ZDHHC20-IT1	NA	sense_intronic
ENSG00000180422	5.97229	-8.44757e-06	0.0014427	0.000557564	0.0268803	LINC00304	NA	lincRNA
ENSG00000196205	62.7625	1.25621	0.609856	0.000559167	0.0268803	EEF1A1P5	NA	processed_pseudogene
ENSG00000212232	303.812	0.844389	0.390358	0.000559487	0.0268803	SNORD17	NA	snoRNA
ENSG00000277925	154.724	0.546923	0.243096	0.000562089	0.0268959	RF00024	NA	misc_RNA
ENSG00000255624	6.33751	-1.3799e-05	0.00144271	0.000567782	0.0269696	AC073585.1	NA	transcribed_processed_pseudogene
ENSG00000283213	15.8808	-1.53307e-05	0.00144272	0.000571908	0.0270528	AC130466.1	NA	lincRNA
ENSG00000258738	6.99255	0.993658	0.438043	0.00057897	0.0272436	AL121603.2	112268124	antisense
ENSG00000261227	11.9121	-1.26717	0.525275	0.000583258	0.027361	AC140912.1	NA	lincRNA
ENSG00000282241	18.6717	-1.42035e-05	0.00144271	0.000585491	0.0273662	AL121839.4	NA	sense_intronic
ENSG00000253894	2.58417	-5.27687e-06	0.0014427	0.000590587	0.0274673	AC011124.2	NA	lincRNA
ENSG00000150175	53.5887	-1.15126e-05	0.0014427	0.000621304	0.0283051	FRMPD2B	NA	unprocessed_pseudogene
ENSG00000272693	13.3595	2.19581	1.22691	0.00063747	0.0287742	AC073107.1	NA	transcribed_unprocessed_pseudogene
ENSG00000283462	19.0425	1.50997	0.772025	0.000673227	0.0298387	AC008505.1	NA	processed_transcript
ENSG00000227097	31.9687	1.66867	0.90465	0.000693097	0.0304005	RPS28P7	NA	processed_pseudogene
ENSG00000257279	25.3097	-0.593592	0.262269	0.000746536	0.0316567	AC127164.1	NA	antisense
ENSG00000229358	77.5604	0.306476	0.142432	0.000765648	0.0319177	DPY19L1P1	NA	unprocessed_pseudogene
ENSG00000198237	142.859	0.863978	0.435958	0.000784796	0.0324922	AC131392.1	NA	unprocessed_pseudogene
ENSG00000261329	34.0595	1.2331	0.657778	0.000807447	0.033032	AC016597.1	NA	antisense
ENSG00000261226	12.9101	-9.86611e-06	0.0014427	0.000874817	0.0343068	AC092384.3	NA	sense_intronic
ENSG00000284391	4.67864	-1.06301e-05	0.0014427	0.000894308	0.0347377	AL139398.1	105373244	antisense
ENSG00000226478	2.32412	-7.05401e-06	0.0014427	0.000896036	0.0347498	UPF3AP1	NA	processed_pseudogene
ENSG00000231527	186.729	-0.495013	0.228278	0.000920765	0.0350979	FAM27C	NA	processed_transcript
ENSG00000285996	10.5038	-1.32726e-05	0.0014427	0.00094774	0.0358474	AC006116.11	NA	antisense
ENSG00000285036	4.33399	3.1604e-06	0.0014427	0.000952897	0.0359575	DHRS4L1	728635	transcribed_unprocessed_pseudogene
ENSG00000244738	10.0943	1.19077	0.630295	0.000990101	0.0366024	AC026316.3	NA	sense_intronic
ENSG00000189332	98.8493	-2.32809e-05	0.00144272	0.00102844	0.0371238	AC090099.1	NA	transcribed_unprocessed_pseudogene
ENSG00000262049	19.6952	0.405705	0.203178	0.00105914	0.0374937	AC139530.2	NA	antisense
ENSG00000273847	163.868	0.756622	0.408365	0.00106422	0.037531	AC139494.2	NA	lincRNA
ENSG00000278763	3.35203	-5.60247e-06	0.0014427	0.00106752	0.0375933	FAM27B	NA	processed_pseudogene
ENSG00000237984	30.2005	-1.33361e-05	0.0014427	0.00107871	0.0377701	PTENP1	NA	transcribed_processed_pseudogene
ENSG00000161149	30.3394	-0.426051	0.209372	0.0011	0.0379954	TUBA3FP	NA	processed_transcript
ENSG00000256218	38.8564	-1.63174e-05	0.00144271	0.00110064	0.0379954	AC007848.2	NA	lincRNA
ENSG00000228543	13.0273	1.72458e-05	0.00144274	0.00111196	0.0380644	AC003684.1	NA	lincRNA
ENSG00000239570	16.0624	-0.633494	0.302644	0.00111443	0.038073	SETP11	NA	processed_pseudogene
ENSG00000196566	10.3954	-0.588938	0.292318	0.00114447	0.0386105	AL138767.1	NA	antisense
ENSG00000231764	572.432	-0.966547	0.457092	0.00117493	0.0392337	DLX6-AS1	NA	antisense
ENSG00000248275	12.3789	0.973396	0.533066	0.00118485	0.039343	TRIM52-AS1	NA	processed_transcript
ENSG00000279066	16.3812	-0.921275	0.441231	0.00118891	0.039343	HEXD-IT1	NA	sense_intronic
ENSG00000233585	5.32608	1.27608	0.695718	0.00121161	0.0397595	AC231533.2	NA	transcribed_processed_pseudogene
ENSG00000259994	92.2645	-0.2778	0.140251	0.00122968	0.0399368	AL353796.1	NA	sense_overlapping
ENSG00000231999	21.7632	0.978807	0.577692	0.00127209	0.0407134	LRRC8C-DT	NA	antisense
ENSG00000243403	3.10433	4.99103e-06	0.0014427	0.0012724	0.0407134	AC090543.2	NA	processed_pseudogene
ENSG00000227694	4.68907	1.07333	0.605816	0.0012919	0.0409631	RPL23AP74	NA	processed_pseudogene
ENSG00000241570	23.8905	-0.504773	0.260253	0.00134608	0.0419219	PAQR9-AS1	NA	antisense
ENSG00000224795	64.8052	0.918603	0.563308	0.00136822	0.0422887	NTM-AS1	NA	lincRNA
ENSG00000258844	32.8203	1.19025	0.776124	0.0013759	0.042389	AL162511.1	NA	lincRNA
ENSG00000282638	17.5256	0.920691	0.549861	0.00137908	0.0424107	AC243742.3	NA	lincRNA
ENSG00000282229	13.481	1.27672	0.801771	0.00138447	0.0424697	AC131056.1	NA	antisense
ENSG00000267575	99.0139	-2.01029e-05	0.00144271	0.00141131	0.0430238	AC006504.5	NA	lincRNA
ENSG00000285454	7.93573	-9.4574e-06	0.0014427	0.00141456	0.0430693	AC111006.1	NA	lincRNA
ENSG00000272182	9.37355	0.764738	0.423124	0.00146019	0.0440212	AC135507.1	NA	antisense
ENSG00000261654	63.8265	-0.528642	0.274362	0.00150892	0.0446661	AL360270.2	NA	sense_overlapping
ENSG00000276127	3.49796	1.35402	0.812634	0.00152207	0.0448929	AL589935.2	NA	processed_pseudogene
ENSG00000204446	15.2134	0.808615	0.49045	0.00152937	0.0448989	C9orf170	401535	lincRNA
ENSG00000221953	17.8259	-0.613423	0.316566	0.0015379	0.0449466	C1orf229	388759	lincRNA
ENSG00000240869	14.7554	1.27247	0.951275	0.00154354	0.044962	RN7SL128P	NA	misc_RNA
ENSG00000256594	25.27	0.740565	0.455607	0.00155795	0.0451365	AC010186.2	NA	transcribed_unprocessed_pseudogene
ENSG00000273015	263.157	0.420622	0.23894	0.00157562	0.0453643	AC008124.1	NA	lincRNA
ENSG00000257681	6.32514	-7.94812e-06	0.0014427	0.00163262	0.0463678	AC025265.1	NA	antisense
ENSG00000222041	99.1309	-0.570374	0.300608	0.00165929	0.0468	CYTOR	NA	lincRNA
ENSG00000264672	67.5618	-0.485088	0.260543	0.00166258	0.0468388	SEPT4-AS1	NA	antisense
ENSG00000245156	22.2446	-0.462723	0.254875	0.00170101	0.047485	AP001107.1	NA	lincRNA
ENSG00000245904	7.9503	1.04426	0.739423	0.0017142	0.0477444	AC025164.1	NA	antisense
ENSG00000184385	21.2315	-1.33586e-05	0.0014427	0.0017237	0.0478359	UMODL1-AS1	NA	sense_overlapping
ENSG00000258603	14.5842	-0.633763	0.351706	0.00175242	0.0481918	AC005225.2	NA	antisense
ENSG00000183199	5.55913	3.14188e-06	0.0014427	0.00178963	0.0484335	HSP90AB3P	NA	processed_pseudogene
ENSG00000204282	49.7836	0.902712	0.645083	0.00179032	0.0484335	TNRC6C-AS1	NA	processed_transcript
ENSG00000226015	5.8752	0.845643	0.551432	0.00178441	0.0484335	CCT8P1	NA	processed_pseudogene
ENSG00000215498	5.10455	-1.49221e-06	0.00144269	0.00180996	0.048696	FAM230B	NA	processed_transcript
ENSG00000213997	2.74895	-9.67029e-06	0.0014427	0.00181778	0.048853	PGAM1P7	NA	processed_pseudogene
ENSG00000245910	191.964	0.393315	0.24719	0.0018479	0.049284	SNHG6	NA	processed_transcript
ENSG00000248942	3.51998	-7.20046e-06	0.0014427	0.00187847	0.0498789	LINC01335	NA	lincRNA
ENSG00000284703	44.6482	-0.455336	0.259474	0.00188515	0.0498789	AL805961.2	NA	lincRNA

## Sheet: ROSMAP Poor vs Normal MMSE
ensembl_gene_id	baseMean	log2FoldChange	lfcSE	pvalue	padj	external_gene_name	gene_biotype
ENSG00000266903	29.7042	0.958333	0.128353	3.36518e-15	6.74028e-12	AC243964.2	antisense
ENSG00000233123	168.679	-0.575096	0.0781718	1.13871e-14	1.88412e-11	LINC01007	lincRNA
ENSG00000251632	13.8198	0.647739	0.0890524	1.49541e-14	2.27637e-11	LINC02172	lincRNA
ENSG00000278911	14.2958	-0.55565	0.0764809	2.92894e-14	3.98085e-11	AC015819.3	processed_transcript
ENSG00000247982	63.0451	0.329018	0.0469515	1.92811e-13	2.03822e-10	LINC00926	lincRNA
ENSG00000225972	116.528	0.937644	0.0841123	9.53765e-13	6.84839e-10	MTND1P23	unprocessed_pseudogene
ENSG00000260257	532.393	0.193572	0.0282582	1.01259e-12	7.13613e-10	AL035071.1	lincRNA
ENSG00000254239	7.92102	0.722456	0.108508	1.25294e-12	8.51464e-10	AC002428.2	lincRNA
ENSG00000260328	258.68	-0.340706	0.0504018	1.37258e-12	9.006e-10	AC104024.2	lincRNA
ENSG00000187984	410.244	-0.195524	0.0289264	1.78267e-12	1.09463e-09	ANKRD19P	transcribed_unprocessed_pseudogene
ENSG00000152931	626.865	-0.325211	0.0485	2.60914e-12	1.43904e-09	PART1	lincRNA
ENSG00000269958	296.964	0.318569	0.0487586	2.93641e-12	1.57341e-09	AL049840.4	sense_intronic
ENSG00000246877	30.0352	-0.363875	0.0555752	4.4507e-12	2.144e-09	DNM1P35	antisense
ENSG00000261195	67.8788	0.410821	0.0632856	4.40331e-12	2.144e-09	AC027130.1	antisense
ENSG00000235823	266.585	0.300336	0.0468745	1.08215e-11	4.42822e-09	OLMALINC	lincRNA
ENSG00000132832	87.0634	-0.263421	0.0411606	1.37178e-11	5.22043e-09	AL139352.1	lincRNA
ENSG00000274718	31.4381	-0.332825	0.0525868	1.93233e-11	6.93741e-09	AL136964.1	lincRNA
ENSG00000226673	5.13683	0.853241	0.141012	4.54967e-11	1.41934e-08	LINC01108	lincRNA
ENSG00000260788	92.834	0.497025	0.0812564	4.55118e-11	1.41934e-08	AC009063.2	antisense
ENSG00000265683	9.36376	-0.38519	0.0622723	4.94915e-11	1.46917e-08	SYPL1P2	processed_pseudogene
ENSG00000279952	6.8695	-0.472414	0.0765081	4.98009e-11	1.46917e-08	AC068787.1	TEC
ENSG00000270607	172.931	-0.283499	0.0456201	6.03372e-11	1.68838e-08	AC009549.1	lincRNA
ENSG00000248455	112.506	-0.250242	0.0403907	7.15118e-11	1.93156e-08	LINC02217	lincRNA
ENSG00000259583	126.763	-0.288885	0.0470787	7.16757e-11	1.93156e-08	AC015712.2	antisense
ENSG00000259616	7.47068	0.539637	0.0891985	7.43547e-11	1.96503e-08	AC104574.2	lincRNA
ENSG00000197322	54.9409	-0.454076	0.0751691	1.00523e-10	2.60237e-08	C17orf102	bidirectional_promoter_lncRNA
ENSG00000280010	20.3026	0.382635	0.0641414	1.20704e-10	3.06234e-08	AP001350.2	TEC
ENSG00000227456	11.6167	0.496128	0.0837036	1.34527e-10	3.32439e-08	LINC00310	lincRNA
ENSG00000187951	30.5894	0.6339	0.0534891	1.63833e-10	3.89676e-08	AC091057.1	processed_transcript
ENSG00000260785	1.97485	0.666873	0.113726	2.13765e-10	4.90063e-08	CASC17	lincRNA
ENSG00000265313	19.1605	-0.424355	0.0721877	2.81097e-10	6.21705e-08	LINC01476	lincRNA
ENSG00000272183	3.88786	0.746259	0.132369	3.99104e-10	8.39134e-08	AC005041.3	antisense
ENSG00000235501	150.659	0.194517	0.0329916	4.47624e-10	9.25804e-08	AC105942.1	antisense
ENSG00000279207	261.428	0.270167	0.0463485	4.65887e-10	9.48117e-08	AC015813.6	TEC
ENSG00000277969	38.0627	0.194667	0.0332028	5.35218e-10	1.0287e-07	AC006449.6	lincRNA
ENSG00000251423	1.58695	-0.680847	0.117988	5.7798e-10	1.07918e-07	AC016576.1	antisense
ENSG00000260000	25.7658	-0.250668	0.0431395	7.36408e-10	1.29744e-07	AL133338.1	antisense
ENSG00000274114	43.3891	-0.249358	0.0430108	8.73465e-10	1.50297e-07	ALOX15P1	transcribed_unprocessed_pseudogene
ENSG00000150175	59.4302	-0.547751	0.096858	8.87256e-10	1.51414e-07	FRMPD2B	unprocessed_pseudogene
ENSG00000231312	439.509	-0.18072	0.0313109	1.0727e-09	1.75204e-07	MAP4K3-DT	antisense
ENSG00000227544	179.755	0.338973	0.0600164	1.09119e-09	1.76709e-07	AC018647.1	lincRNA
ENSG00000226435	29.4194	-0.287944	0.0506741	1.15358e-09	1.84457e-07	ANKRD18DP	transcribed_unprocessed_pseudogene
ENSG00000228058	60.6882	0.488545	0.0880022	1.28934e-09	1.9946e-07	LINC01736	lincRNA
ENSG00000236714	13.6819	-0.399841	0.0715553	1.49728e-09	2.20069e-07	LINC01844	lincRNA
ENSG00000248738	43.4108	-0.415937	0.0753418	2.13382e-09	2.86943e-07	AC037441.1	antisense
ENSG00000260549	165.975	0.461003	0.0843929	2.29036e-09	2.97481e-07	MT1L	transcribed_unprocessed_pseudogene
ENSG00000260293	146.473	0.227238	0.0407153	2.33728e-09	3.01517e-07	AC106820.4	sense_intronic
ENSG00000246363	28.5436	-0.400167	0.0723703	2.3705e-09	3.03743e-07	LINC02458	lincRNA
ENSG00000233621	38.1983	0.247942	0.0448492	2.4094e-09	3.07692e-07	LINC01137	antisense
ENSG00000238197	86.8352	-0.168279	0.0296619	2.44427e-09	3.11101e-07	PAXBP1-AS1	antisense
ENSG00000256577	39.4042	0.331091	0.0602546	2.47728e-09	3.13415e-07	AC007406.4	antisense
ENSG00000253642	33.7467	0.300587	0.0549038	2.49189e-09	3.14011e-07	AF279873.3	lincRNA
ENSG00000145063	120.471	-0.284543	0.0511219	3.10654e-09	3.78918e-07	AC062028.1	lincRNA
ENSG00000225177	187.157	0.310932	0.0573853	3.49484e-09	4.15623e-07	AL590617.2	antisense
ENSG00000177335	74.1401	-0.169891	0.0304529	3.59057e-09	4.21737e-07	C8orf31	processed_transcript
ENSG00000223432	1.29851	0.738049	0.138539	4.06161e-09	4.63188e-07	AC009988.1	lincRNA
ENSG00000258057	58.2478	-0.1804	0.0329319	4.34649e-09	4.865e-07	BCDIN3D-AS1	antisense
ENSG00000271239	4.38036	0.508838	0.0957684	4.72312e-09	5.13552e-07	AC007423.1	lincRNA
ENSG00000233487	83.0335	-0.25078	0.0462714	5.32657e-09	5.59966e-07	RPSAP69	transcribed_processed_pseudogene
ENSG00000271714	26.138	-0.283626	0.0524884	5.80268e-09	5.96829e-07	AC010501.1	antisense
ENSG00000198744	154.833	0.506273	0.087869	6.25493e-09	6.29217e-07	MTCO3P12	unprocessed_pseudogene
ENSG00000267372	258.676	-0.223478	0.0413262	6.38978e-09	6.3824e-07	AC005330.1	lincRNA
ENSG00000258768	46.4297	-0.237881	0.0444431	8.82552e-09	8.32165e-07	AL356019.2	lincRNA
ENSG00000280206	37.437	0.300204	0.0571247	8.93046e-09	8.38311e-07	AC026401.3	lincRNA
ENSG00000224536	55.6514	0.260407	0.0493068	9.37741e-09	8.72535e-07	AC096677.1	antisense
ENSG00000277020	36.0298	0.32002	0.0610354	1.03577e-08	9.59054e-07	AL590096.1	antisense
ENSG00000280639	2.55624	0.528967	0.102609	1.04066e-08	9.61248e-07	LINC02204	lincRNA
ENSG00000257522	17.1861	-0.252592	0.0474936	1.07522e-08	9.78915e-07	AL133166.1	processed_transcript
ENSG00000260032	13495	-0.109793	0.0199469	1.21882e-08	1.08882e-06	NORAD	lincRNA
ENSG00000205959	168.649	-0.31484	0.0597728	1.23144e-08	1.09495e-06	AC105345.1	lincRNA
ENSG00000237424	12.6762	0.374924	0.0731818	1.28467e-08	1.1313e-06	FOXD2-AS1	lincRNA
ENSG00000254211	21.7355	0.303337	0.0587568	1.39415e-08	1.22248e-06	LINC01485	lincRNA
ENSG00000266208	13.2253	-0.237704	0.0453311	1.53382e-08	1.32361e-06	AC080112.1	antisense
ENSG00000282375	21.4338	-0.330987	0.0636439	1.54019e-08	1.32609e-06	AC100797.5	lincRNA
ENSG00000223930	12.1868	-0.476837	0.0934359	1.78003e-08	1.4823e-06	AC117453.1	antisense
ENSG00000225342	19.4282	-0.267336	0.0519302	2.52509e-08	1.96112e-06	AC079630.1	antisense
ENSG00000251372	84.4115	0.424762	0.0847274	2.51829e-08	1.96112e-06	LINC00499	lincRNA
ENSG00000205562	29.492	-0.285034	0.0553933	2.56649e-08	1.98517e-06	AL049775.1	lincRNA
ENSG00000214043	33.3915	-0.29993	0.0585841	2.58031e-08	1.98912e-06	LINC02347	lincRNA
ENSG00000223831	4.03494	0.509862	0.103768	2.60903e-08	2.00584e-06	AC005006.1	sense_intronic
ENSG00000227107	11.0518	-0.308307	0.0601902	2.63222e-08	2.01959e-06	AC104667.1	lincRNA
ENSG00000217078	1.64501	0.669304	0.135118	2.87463e-08	2.17489e-06	AL021407.1	processed_pseudogene
ENSG00000255671	9.76028	0.452495	0.0909997	2.88686e-08	2.17981e-06	AC007406.1	antisense
ENSG00000230805	19.5335	-0.316306	0.0621756	2.9872e-08	2.23183e-06	AL132709.1	lincRNA
ENSG00000258738	10.7689	0.29612	0.058956	2.97498e-08	2.23183e-06	AL121603.2	antisense
ENSG00000235641	7.53823	0.464163	0.0941732	3.04574e-08	2.26827e-06	LINC00484	lincRNA
ENSG00000253549	23.5899	0.292707	0.0582745	3.1032e-08	2.29758e-06	CA3-AS1	antisense
ENSG00000224825	34.5333	-0.324326	0.0636701	3.13342e-08	2.31096e-06	RORB-AS1	antisense
ENSG00000258634	126.221	0.13825	0.0263112	3.30216e-08	2.40281e-06	AL160006.1	antisense
ENSG00000254561	85.4373	-0.334433	0.0667037	3.62014e-08	2.57601e-06	AP003393.1	antisense
ENSG00000277476	164.784	0.144502	0.0277744	3.74683e-08	2.64544e-06	AC005332.5	lincRNA
ENSG00000225948	2.0912	0.534781	0.108345	3.88504e-08	2.72282e-06	LINC02648	lincRNA
ENSG00000236753	90.7347	0.223529	0.04391	3.92995e-08	2.73065e-06	MKLN1-AS	processed_transcript
ENSG00000267714	40.2405	0.245064	0.0488871	4.1325e-08	2.8184e-06	AC008738.4	antisense
ENSG00000236423	12.2463	0.413031	0.0843171	4.26558e-08	2.87512e-06	LINC01134	lincRNA
ENSG00000248673	7.97751	-0.373051	0.074489	4.27611e-08	2.87512e-06	LINC01331	lincRNA
ENSG00000271614	277.516	-0.198086	0.0385652	4.35949e-08	2.91061e-06	ATP2B1-AS1	lincRNA
ENSG00000184669	14.0911	0.314237	0.0639776	4.59874e-08	3.00188e-06	OR7E14P	transcribed_unprocessed_pseudogene
ENSG00000249436	111.386	-0.270076	0.0540251	4.69203e-08	3.04191e-06	AC008780.2	lincRNA
ENSG00000255986	25.5954	0.573775	0.117793	4.89104e-08	3.14947e-06	MT1JP	transcribed_unprocessed_pseudogene
ENSG00000256422	38.6589	-0.317197	0.0638332	5.22976e-08	3.33373e-06	LINC02552	lincRNA
ENSG00000246022	73.1762	0.259602	0.0525437	5.70002e-08	3.57274e-06	ALDH1L1-AS2	antisense
ENSG00000250770	23.0919	-0.37208	0.0753664	5.72674e-08	3.57274e-06	AC005865.2	transcribed_unprocessed_pseudogene
ENSG00000203565	3.10321	0.838437	0.173318	5.80533e-08	3.59817e-06	AL450313.1	lincRNA
ENSG00000248801	9.13327	-0.287438	0.0577198	5.85302e-08	3.62183e-06	C8orf34-AS1	antisense
ENSG00000100181	181.858	0.252677	0.0510461	6.06249e-08	3.72721e-06	TPTEP1	transcribed_unprocessed_pseudogene
ENSG00000213062	5.26885	-0.440948	0.0893056	6.08593e-08	3.73043e-06	AL021068.1	lincRNA
ENSG00000236296	27.5364	-0.256779	0.0518737	6.24288e-08	3.80127e-06	GUSBP5	transcribed_processed_pseudogene
ENSG00000248441	95.2064	-0.17303	0.0343497	7.28565e-08	4.29864e-06	LINC01197	lincRNA
ENSG00000253741	26.184	-0.268369	0.0548931	7.88902e-08	4.56963e-06	LNCOC1	antisense
ENSG00000237879	7.26449	-0.464204	0.0951381	8.05337e-08	4.62923e-06	LINC00398	lincRNA
ENSG00000265179	43.7349	-0.27976	0.0572931	8.24758e-08	4.7057e-06	AP000894.2	processed_transcript
ENSG00000261553	31.0493	-0.384848	0.0794876	8.27285e-08	4.70601e-06	AL137782.1	processed_transcript
ENSG00000261490	35.8456	0.228218	0.0467223	9.08677e-08	5.09288e-06	AC005674.2	sense_overlapping
ENSG00000259322	3.76163	-0.358593	0.0744018	9.89475e-08	5.44941e-06	AC090607.1	antisense
ENSG00000196593	8.59524	-0.690129	0.110057	9.95742e-08	5.47601e-06	ANKRD20A19P	transcribed_unprocessed_pseudogene
ENSG00000228401	5.31466	0.423892	0.0898796	1.02706e-07	5.61579e-06	AL590226.1	antisense
ENSG00000281332	95.562	0.174296	0.0353222	1.09584e-07	5.94006e-06	LINC00997	lincRNA
ENSG00000225684	7.11836	-0.574979	0.12305	1.15671e-07	6.19127e-06	FAM225B	lincRNA
ENSG00000277829	23.0265	0.290499	0.0609941	1.15552e-07	6.19127e-06	AL031651.2	sense_intronic
ENSG00000216863	140.872	-0.255374	0.0529262	1.28018e-07	6.60387e-06	LY86-AS1	antisense
ENSG00000273628	31.9483	-0.216928	0.0445867	1.35258e-07	6.89999e-06	AL354798.1	unprocessed_pseudogene
ENSG00000255916	128.723	-0.290615	0.0608449	1.38046e-07	7.00195e-06	AC148477.1	antisense
ENSG00000237379	1.70959	0.69103	0.148717	1.41685e-07	7.15218e-06	CBX1P3	processed_pseudogene
ENSG00000225953	115.144	-0.185023	0.0378854	1.45403e-07	7.23479e-06	SATB2-AS1	antisense
ENSG00000235595	10.4244	-0.335661	0.0701937	1.4784e-07	7.32577e-06	GAPDHP23	processed_pseudogene
ENSG00000205634	19.4732	-0.377417	0.079796	1.55256e-07	7.61395e-06	LINC00898	lincRNA
ENSG00000257702	9.71292	0.404062	0.0869776	1.58965e-07	7.77579e-06	LBX2-AS1	antisense
ENSG00000233396	25.4101	-0.230015	0.0477482	1.59303e-07	7.78211e-06	LINC01719	lincRNA
ENSG00000236352	6.95996	0.393593	0.0858181	1.62295e-07	7.88467e-06	AC005220.1	antisense
ENSG00000224273	2.48353	-0.569533	0.121955	1.66436e-07	8.00747e-06	AC005077.2	transcribed_unprocessed_pseudogene
ENSG00000230537	20.7966	0.274611	0.0587154	1.66935e-07	8.0112e-06	AL158071.3	lincRNA
ENSG00000276269	15.9615	0.479257	0.103385	1.70257e-07	8.13984e-06	AL355974.3	lincRNA
ENSG00000230882	24.6632	-0.436816	0.0936988	1.79768e-07	8.48788e-06	AC005077.4	processed_pseudogene
ENSG00000271849	24.5341	-0.221875	0.0462751	1.82653e-07	8.57098e-06	AC012603.1	lincRNA
ENSG00000234420	954.96	-0.0945257	0.0187433	1.92008e-07	8.93282e-06	ZNF37BP	transcribed_processed_pseudogene
ENSG00000227036	200.748	0.136417	0.0279069	2.09562e-07	9.55101e-06	LINC00511	processed_transcript
ENSG00000247556	9255.08	-0.157281	0.0321467	2.14989e-07	9.76325e-06	OIP5-AS1	processed_transcript
ENSG00000273428	1.41959	0.587961	0.128901	2.19882e-07	9.93804e-06	AC004832.6	lincRNA
ENSG00000255727	0.624195	0.803464	0.173503	2.28904e-07	1.02726e-05	LINC01489	lincRNA
ENSG00000188511	48.3168	0.316818	0.0687524	2.41467e-07	1.07848e-05	C22orf34	lincRNA
ENSG00000205488	10.2881	-0.32801	0.0705404	2.42357e-07	1.07999e-05	CALML3-AS1	antisense
ENSG00000235949	11.1328	-0.45464	0.0984302	2.50129e-07	1.10557e-05	AC061961.1	antisense
ENSG00000227392	23.9307	0.269979	0.0582215	2.58388e-07	1.13286e-05	HPN-AS1	antisense
ENSG00000271862	14.0364	0.227622	0.048641	2.58218e-07	1.13286e-05	AC104118.1	lincRNA
ENSG00000178977	17.8436	0.227807	0.0490104	2.64481e-07	1.15293e-05	LINC00324	lincRNA
ENSG00000225554	102.117	-0.21821	0.0463588	2.66923e-07	1.16092e-05	AL359764.1	lincRNA
ENSG00000250198	21.7343	0.284194	0.0615934	2.85612e-07	1.22264e-05	LINC02199	lincRNA
ENSG00000275703	14.6959	0.226715	0.0492646	2.90515e-07	1.24083e-05	U47924.3	lincRNA
ENSG00000230224	15.7132	-0.370105	0.0805397	2.91959e-07	1.24421e-05	PHBP9	processed_pseudogene
ENSG00000256193	195.165	-0.341686	0.0737935	2.95678e-07	1.25584e-05	LINC00507	lincRNA
ENSG00000224116	39.6585	-0.284814	0.0613176	3.00746e-07	1.2731e-05	INHBA-AS1	antisense
ENSG00000229782	19.3326	-0.222071	0.0474552	3.0949e-07	1.30287e-05	AC118754.2	antisense
ENSG00000224812	34.324	-0.180412	0.0380619	3.19677e-07	1.33249e-05	TMEM72-AS1	antisense
ENSG00000233452	361.681	-0.177939	0.0375878	3.22372e-07	1.33932e-05	STXBP5-AS1	antisense
ENSG00000278969	10.2844	-0.276987	0.0598996	3.28172e-07	1.36045e-05	AC026310.3	TEC
ENSG00000229618	21.4958	-0.308604	0.0672148	3.34518e-07	1.38374e-05	AC011287.1	lincRNA
ENSG00000257135	14.8497	-0.281628	0.0615602	3.7706e-07	1.51675e-05	ODC1-DT	lincRNA
ENSG00000187013	4.1174	0.415754	0.09374	3.83351e-07	1.53382e-05	C17orf82	lincRNA
ENSG00000279253	94.6997	0.167684	0.0358147	3.83767e-07	1.53382e-05	AL121753.2	TEC
ENSG00000183935	55.3224	-0.209033	0.0449796	3.8605e-07	1.53677e-05	HTR7P1	transcribed_processed_pseudogene
ENSG00000274272	23.7499	0.269409	0.0593552	3.9405e-07	1.56371e-05	AC069281.2	processed_transcript
ENSG00000278962	19.5566	-0.450555	0.100022	3.98676e-07	1.57641e-05	AC092645.1	TEC
ENSG00000264016	10.2538	0.308982	0.0691989	4.07405e-07	1.60333e-05	AC015908.3	lincRNA
ENSG00000270978	4.11527	0.408414	0.0917844	4.12083e-07	1.61672e-05	AC091982.2	processed_pseudogene
ENSG00000260920	115.668	-0.166822	0.0352515	4.17766e-07	1.63062e-05	AL031985.3	sense_overlapping
ENSG00000272402	13.7724	0.222443	0.0486365	4.35494e-07	1.68942e-05	AL031775.2	antisense
ENSG00000260288	6.37451	-0.272009	0.0596667	4.4198e-07	1.71283e-05	AC019294.2	processed_transcript
ENSG00000230615	51.8432	0.214361	0.0468419	4.46173e-07	1.72206e-05	AL139220.2	lincRNA
ENSG00000282564	11.1502	-0.295008	0.065052	4.71787e-07	1.80028e-05	AL133516.1	lincRNA
ENSG00000261167	31.1457	-0.189326	0.0407947	5.14229e-07	1.92613e-05	AC107027.3	sense_overlapping
ENSG00000215452	44.1696	0.206867	0.0456161	5.41913e-07	2.01594e-05	ZNF663P	transcribed_unitary_pseudogene
ENSG00000260593	1.90495	0.509791	0.117023	5.43792e-07	2.01898e-05	AC009097.2	antisense
ENSG00000234111	22.3713	-0.242844	0.0534837	5.6e-07	2.06106e-05	LINC02433	lincRNA
ENSG00000205740	35.2831	-0.205799	0.0451185	5.73076e-07	2.09165e-05	AL359878.1	processed_transcript
ENSG00000233461	19.9157	0.252293	0.056509	5.76174e-07	2.10028e-05	AL445524.1	antisense
ENSG00000259234	34.8416	-0.279363	0.0621124	5.97193e-07	2.16652e-05	ANKRD34C-AS1	lincRNA
ENSG00000257501	8.38543	-0.353041	0.0795892	6.12286e-07	2.20655e-05	AC007424.1	transcribed_processed_pseudogene
ENSG00000283078	61.1608	-0.134583	0.0286311	6.2982e-07	2.25056e-05	AL137077.2	lincRNA
ENSG00000226380	422.866	0.19067	0.0424813	6.3267e-07	2.25862e-05	AC016831.1	lincRNA
ENSG00000280187	90.7561	-0.146916	0.0316245	6.47581e-07	2.30536e-05	AC022107.1	TEC
ENSG00000279369	68.0793	-0.196275	0.0432296	6.71288e-07	2.36323e-05	AC046185.3	TEC
ENSG00000249577	19.3952	0.372763	0.0850202	6.81188e-07	2.38924e-05	AC010424.1	processed_pseudogene
ENSG00000237686	23.996	-0.263873	0.0593667	7.0629e-07	2.45243e-05	AL109615.3	antisense
ENSG00000273419	9.89743	0.20878	0.0465788	7.53778e-07	2.596e-05	AC004877.1	antisense
ENSG00000227598	9.74986	-0.257424	0.0580538	7.90878e-07	2.71395e-05	Z94721.1	bidirectional_promoter_lncRNA
ENSG00000268001	20.1727	0.28842	0.0663711	8.03297e-07	2.74419e-05	CARD8-AS1	antisense
ENSG00000253210	24.1367	-0.199297	0.0443469	8.2049e-07	2.7929e-05	AC040970.1	antisense
ENSG00000259882	1.21658	0.762155	0.18041	8.2201e-07	2.79557e-05	AC142384.1	unprocessed_pseudogene
ENSG00000255437	13.5504	0.501051	0.117861	8.43541e-07	2.85857e-05	AC023538.1	processed_pseudogene
ENSG00000228016	29.4248	-0.223673	0.0500164	8.54826e-07	2.88654e-05	RAPGEF4-AS1	antisense
ENSG00000280220	1.8487	0.485138	0.113563	8.80222e-07	2.95916e-05	AL157414.3	TEC
ENSG00000254810	2.65365	0.47881	0.112156	9.16725e-07	3.06563e-05	AP001189.3	lincRNA
ENSG00000224222	49.2766	-0.228919	0.0515556	9.49915e-07	3.14895e-05	LINC02636	lincRNA
ENSG00000278861	8.78212	-0.310557	0.071008	9.67813e-07	3.18884e-05	AC117503.2	TEC
ENSG00000205056	3.02347	0.62413	0.148699	9.72992e-07	3.1976e-05	LINC02397	lincRNA
ENSG00000260460	11.9156	-0.349049	0.0809505	1.0044e-06	3.27254e-05	AL365181.1	lincRNA
ENSG00000203645	3.49668	-0.319817	0.0738607	1.04013e-06	3.35734e-05	LINC00501	lincRNA
ENSG00000259250	53.0394	0.218533	0.0496825	1.03915e-06	3.35734e-05	AC018904.1	antisense
ENSG00000272644	15.2571	0.225912	0.0523399	1.06093e-06	3.41871e-05	AC097468.3	lincRNA
ENSG00000233237	24.5834	0.225227	0.0516203	1.07944e-06	3.46659e-05	LINC00472	lincRNA
ENSG00000226717	14.4159	-0.286548	0.0659715	1.15191e-06	3.65615e-05	PTPRD-AS2	lincRNA
ENSG00000214353	197.744	0.250351	0.0578179	1.20804e-06	3.80195e-05	VAC14-AS1	antisense
ENSG00000229604	13.7842	0.343302	0.0819033	1.2326e-06	3.86391e-05	MTATP8P2	processed_pseudogene
ENSG00000235505	17.3298	0.330529	0.0776501	1.26323e-06	3.94044e-05	CASP17P	transcribed_unprocessed_pseudogene
ENSG00000261026	10.4504	-0.305402	0.0707603	1.27239e-06	3.96576e-05	AC105046.1	sense_overlapping
ENSG00000269019	8.22176	0.354371	0.0845837	1.35913e-06	4.19933e-05	HOMER3-AS1	antisense
ENSG00000176840	208.437	-0.222106	0.051154	1.40154e-06	4.30957e-05	MIR7-3HG	lincRNA
ENSG00000245910	615.273	0.127101	0.0280182	1.4171e-06	4.34913e-05	SNHG6	processed_transcript
ENSG00000224425	3.36924	-0.434204	0.102871	1.47413e-06	4.4832e-05	AC073869.2	processed_pseudogene
ENSG00000256597	6.56642	0.333946	0.0795919	1.47515e-06	4.4832e-05	LINC02393	lincRNA
ENSG00000269680	2.95919	0.422621	0.102022	1.5138e-06	4.56854e-05	AC008760.1	antisense
ENSG00000279513	3.72341	-0.351037	0.0829877	1.52859e-06	4.60587e-05	AL157902.2	TEC
ENSG00000204403	3.94036	0.434954	0.10454	1.53027e-06	4.60729e-05	CASP12	polymorphic_pseudogene
ENSG00000239415	76.9231	0.145276	0.0325537	1.53639e-06	4.61474e-05	AP001469.3	antisense
ENSG00000237732	59.7953	-0.142679	0.0321038	1.53894e-06	4.61849e-05	AC010980.1	transcribed_unprocessed_pseudogene
ENSG00000279123	21.087	0.255551	0.0601667	1.54006e-06	4.61849e-05	AC027281.2	TEC
ENSG00000225978	253.667	-0.194207	0.0446059	1.54923e-06	4.63501e-05	HAR1A	lincRNA
ENSG00000269799	5.12773	0.507029	0.124389	1.55141e-06	4.63791e-05	AC008737.3	sense_intronic
ENSG00000235482	23.6993	0.250143	0.059154	1.56562e-06	4.67672e-05	RPL21P135	processed_pseudogene
ENSG00000251669	28.4872	-0.192789	0.0439972	1.56951e-06	4.68465e-05	FAM86EP	transcribed_unprocessed_pseudogene
ENSG00000244128	68.8869	0.228418	0.0539581	1.57745e-06	4.70097e-05	LINC01322	lincRNA
ENSG00000225385	7.25712	-0.273807	0.0642865	1.58996e-06	4.73085e-05	AL353572.1	processed_pseudogene
ENSG00000211574	579.762	-0.227877	0.0532194	1.75884e-06	5.14881e-05	MIR770	miRNA
ENSG00000255162	3.22944	-0.455654	0.109157	1.78243e-06	5.20584e-05	AP004833.2	unprocessed_pseudogene
ENSG00000281327	31.2023	0.430716	0.104112	1.84371e-06	5.34381e-05	LINC01338	lincRNA
ENSG00000273472	16.6371	-0.2276	0.053354	1.89768e-06	5.4576e-05	AC096733.2	lincRNA
ENSG00000272750	37.1405	0.190993	0.0442349	1.93026e-06	5.53712e-05	AL592148.3	antisense
ENSG00000226562	43.9422	-0.250177	0.058673	1.95128e-06	5.58749e-05	CYP4F26P	lincRNA
ENSG00000226519	3.55908	-0.459732	0.110533	2.00087e-06	5.69098e-05	LINC00390	lincRNA
ENSG00000269736	11.6966	0.292372	0.0708346	2.04368e-06	5.77817e-05	AC010319.5	lincRNA
ENSG00000260271	2.55647	-0.400782	0.0969072	2.06295e-06	5.824e-05	AL132996.1	lincRNA
ENSG00000229891	62.6076	0.171791	0.0397661	2.19341e-06	6.11519e-05	LINC01315	lincRNA
ENSG00000254575	3.88887	0.442192	0.108929	2.27135e-06	6.29561e-05	AC022039.1	antisense
ENSG00000258859	18.5946	-0.371705	0.0902054	2.38193e-06	6.54016e-05	LINC02296	lincRNA
ENSG00000278727	37.5747	-0.285068	0.0684193	2.40892e-06	6.58576e-05	AC000403.1	lincRNA
ENSG00000281692	20.5894	0.247729	0.0591936	2.48523e-06	6.73633e-05	PACRG-AS1	antisense
ENSG00000234373	14.2818	-0.352782	0.0857835	2.53931e-06	6.85847e-05	SNX18P7	processed_pseudogene
ENSG00000257896	8.31018	-0.292402	0.0706762	2.66254e-06	7.10557e-05	AC093012.1	transcribed_unprocessed_pseudogene
ENSG00000270020	30.9572	0.254615	0.0617255	2.72742e-06	7.22804e-05	AC009108.3	lincRNA
ENSG00000270953	70.0779	-0.247854	0.0595623	2.7583e-06	7.28211e-05	AC007938.3	antisense
ENSG00000234028	18.0696	-0.223301	0.0533212	2.87093e-06	7.5349e-05	EIF2AK3-DT	antisense
ENSG00000255920	14.9134	-0.228242	0.0544873	2.99685e-06	7.78486e-05	CCND2-AS1	processed_transcript
ENSG00000279145	25.8997	-0.223513	0.0539891	3.17902e-06	8.15783e-05	AC011912.1	lincRNA
ENSG00000277290	21.2621	-0.266351	0.064979	3.33594e-06	8.4748e-05	AC136475.10	processed_pseudogene
ENSG00000268895	27.7701	-0.204595	0.0489983	3.44203e-06	8.69786e-05	A1BG-AS1	antisense
ENSG00000270880	5.43007	-0.413055	0.102765	3.56832e-06	8.93982e-05	AC128687.1	processed_pseudogene
ENSG00000279484	8.77284	-0.265279	0.064873	3.5768e-06	8.94929e-05	KLHL30-AS1	TEC
ENSG00000273271	38.8548	0.184166	0.0440438	3.65742e-06	9.10909e-05	AP000254.1	antisense
ENSG00000266947	14.4841	-0.212662	0.0512732	3.67482e-06	9.13449e-05	AC022916.1	antisense
ENSG00000267665	64.0431	-0.174692	0.0414445	3.78468e-06	9.35257e-05	AC021683.3	lincRNA
ENSG00000254872	11.9547	-0.374028	0.0936772	3.79306e-06	9.3651e-05	AC139749.1	lincRNA
ENSG00000231443	24.7634	-0.191642	0.0463597	4.07334e-06	9.91778e-05	AC124944.2	processed_pseudogene
ENSG00000225683	93.1272	0.283126	0.0713377	4.19052e-06	0.000101125	PACRG-AS3	antisense
ENSG00000279118	810.111	0.217988	0.0534629	4.23323e-06	0.000101833	AC093535.2	TEC
ENSG00000229344	195.7	0.653548	0.0651133	4.31044e-06	0.000103169	MTCO2P12	unprocessed_pseudogene
ENSG00000279908	4.45899	-0.365597	0.0915747	4.37445e-06	0.000104438	AC026748.1	TEC
ENSG00000253540	50.6581	-0.252706	0.062475	4.38465e-06	0.00010455	FAM86HP	transcribed_unprocessed_pseudogene
ENSG00000256008	204.689	-0.176874	0.0425236	4.61183e-06	0.000108876	AC125616.1	antisense
ENSG00000273183	14.6566	0.240339	0.0600619	4.81028e-06	0.000112791	AC093726.2	antisense
ENSG00000261586	44.4555	-0.157608	0.0374834	4.83766e-06	0.000113224	AC068987.4	lincRNA
ENSG00000255442	2.87022	-0.495065	0.125104	4.90211e-06	0.00011442	AC109635.5	unprocessed_pseudogene
ENSG00000224404	14.0795	-0.346783	0.0880335	5.02277e-06	0.000116535	Z68323.1	lincRNA
ENSG00000227625	2.77176	-0.35677	0.0910921	5.11533e-06	0.000118297	AL359510.1	processed_pseudogene
ENSG00000274356	12.4361	-0.247044	0.0614315	5.16484e-06	0.000119123	AL355987.5	unprocessed_pseudogene
ENSG00000272760	52.6091	0.24334	0.0609593	5.37365e-06	0.000122705	AC093726.1	antisense
ENSG00000176584	1.07604	-0.559234	0.144075	5.37825e-06	0.000122707	DMBT1P1	transcribed_unprocessed_pseudogene
ENSG00000255031	12.323	0.279965	0.0714166	5.45424e-06	0.000123773	AP002807.1	antisense
ENSG00000226194	9.78179	-0.252708	0.0629749	5.49047e-06	0.000124446	LINC02519	lincRNA
ENSG00000267519	95.8189	0.24893	0.0626382	5.5689e-06	0.000125999	AC020916.1	antisense
ENSG00000280157	71.7259	-0.166518	0.0404993	5.6285e-06	0.000127196	AL359510.2	TEC
ENSG00000237976	5.58435	0.272455	0.0694939	5.66601e-06	0.000127665	AL391069.2	antisense
ENSG00000248714	29.2913	0.232122	0.0580655	5.69086e-06	0.000127997	AC091180.2	lincRNA
ENSG00000229431	30.8733	-0.150257	0.0361303	5.91092e-06	0.000132555	AL139289.1	antisense
ENSG00000276462	216.635	-0.273194	0.0693793	5.91978e-06	0.000132676	BX255923.2	lincRNA
ENSG00000262039	26.2644	0.307687	0.0792292	5.93708e-06	0.000132985	AC091180.5	antisense
ENSG00000258736	6.4492	-0.288722	0.073333	5.95078e-06	0.00013315	AL583722.3	lincRNA
ENSG00000197376	9.29385	-0.218215	0.0544686	5.98574e-06	0.000133839	AC089987.1	transcribed_processed_pseudogene
ENSG00000234494	30.9721	-0.133688	0.0322428	6.04827e-06	0.000134999	SP2-AS1	antisense
ENSG00000078319	86.5453	-0.113259	0.026478	6.06148e-06	0.000135214	PMS2P1	unprocessed_pseudogene
ENSG00000225675	20.7579	-0.219847	0.0548691	6.08137e-06	0.000135533	LINC01771	lincRNA
ENSG00000228547	10.5799	0.367197	0.0958757	6.17168e-06	0.00013711	OR7E26P	unprocessed_pseudogene
ENSG00000252274	1.72171	0.429421	0.111881	6.22142e-06	0.000137733	RF00422	scaRNA
ENSG00000279019	35.0844	0.187221	0.0463402	6.23277e-06	0.000137904	AC009090.4	TEC
ENSG00000231689	10.9227	-0.27101	0.0685551	6.27693e-06	0.000138719	LINC01090	lincRNA
ENSG00000257542	4.85208	-0.527424	0.137803	6.30523e-06	0.000138968	OR7E47P	transcribed_unprocessed_pseudogene
ENSG00000263400	16.4876	0.225551	0.0567626	6.30642e-06	0.000138968	TMEM220-AS1	antisense
ENSG00000244701	41.562	0.171644	0.0422605	6.33852e-06	0.000139513	AC004918.1	antisense
ENSG00000251450	24.4038	-0.215773	0.0538565	6.4242e-06	0.000141317	RASGRF2-AS1	antisense
ENSG00000234394	7.63562	-0.355162	0.0913207	6.66941e-06	0.000145701	AL353608.3	lincRNA
ENSG00000279803	9.30176	0.107181	0.0790851	6.73102e-06	0.000146794	AC009090.5	TEC
ENSG00000232903	36.194	-0.281545	0.0719108	6.75292e-06	0.000147127	LINC01166	lincRNA
ENSG00000274265	109.612	0.17883	0.0444325	6.97025e-06	0.00015063	AC245297.3	lincRNA
ENSG00000203280	31.4142	-0.174777	0.0433	7.00665e-06	0.000151159	AL022323.1	antisense
ENSG00000234693	4.29573	0.478396	0.129665	7.1412e-06	0.000153366	AL353653.1	antisense
ENSG00000240707	59.3882	-0.247852	0.0630277	7.24264e-06	0.00015537	LINC01168	lincRNA
ENSG00000223396	66.6205	0.251655	0.0644002	7.27117e-06	0.00015589	RPS10P7	transcribed_processed_pseudogene
ENSG00000261737	19.3242	-0.164166	0.0402466	7.57912e-06	0.000161045	AL049597.2	antisense
ENSG00000228060	2.06926	-0.380335	0.0993754	7.60736e-06	0.000161374	PABPC4-AS1	antisense
ENSG00000221539	15.6805	0.188285	0.0477733	7.68728e-06	0.000162616	SNORD99	snoRNA
ENSG00000272971	55.936	-0.128853	0.0310414	8.07642e-06	0.000168414	AL365181.4	lincRNA
ENSG00000223804	77.6084	0.222935	0.0571821	8.22782e-06	0.000171103	AC244669.1	transcribed_unprocessed_pseudogene
ENSG00000238098	184.217	-0.107908	0.0256427	8.23554e-06	0.000171143	ABCA17P	transcribed_unitary_pseudogene
ENSG00000258591	13.9927	-0.189272	0.0474376	8.30586e-06	0.000172231	PPIAP4	processed_pseudogene
ENSG00000204261	24.9434	0.223121	0.0573172	8.39264e-06	0.000173487	PSMB8-AS1	lincRNA
ENSG00000244062	33.1893	0.313106	0.082567	8.64761e-06	0.000177696	AC080128.1	processed_pseudogene
ENSG00000279619	28.1154	-0.336554	0.0884829	8.66783e-06	0.000178016	AC020907.5	TEC
ENSG00000208772	10.8264	-0.259534	0.0665225	8.81195e-06	0.000179907	SNORD94	snoRNA
ENSG00000199217	5.49342	-0.349358	0.0914746	8.86233e-06	0.000180742	RNU6-1123P	snRNA
ENSG00000250802	51.2884	0.142374	0.0353982	8.869e-06	0.000180781	ZBED3-AS1	antisense
ENSG00000263189	0.857749	-0.602248	0.158246	9.11473e-06	0.000184549	AC023934.1	processed_pseudogene
ENSG00000251442	211.573	0.265721	0.0703026	9.33631e-06	0.000187891	LINC01094	lincRNA
ENSG00000261924	19.1415	0.303535	0.0797882	9.37972e-06	0.000188665	AC127496.1	antisense
ENSG00000250208	38.9979	0.247087	0.0643095	9.45268e-06	0.000189432	FZD10-AS1	processed_transcript
ENSG00000277051	14.8072	0.120164	0.0851163	9.60172e-06	0.000192014	RF00017	misc_RNA
ENSG00000228417	6.83631	0.320408	0.0870005	9.66124e-06	0.000192799	AL360182.2	antisense
ENSG00000204282	134.292	0.220035	0.0566838	9.74509e-06	0.000194066	TNRC6C-AS1	processed_transcript
ENSG00000271551	23.6618	-0.181552	0.0459536	1.01363e-05	0.000200687	AL355297.4	antisense
ENSG00000253121	1.49891	-0.423198	0.113545	1.0444e-05	0.00020583	AC120042.2	antisense
ENSG00000272906	5.21693	0.298321	0.0804413	1.08391e-05	0.000212625	AL353708.3	lincRNA
ENSG00000237737	77.3682	-0.20055	0.0511849	1.09244e-05	0.000213748	DCTN1-AS1	antisense
ENSG00000231768	86.2937	0.258191	0.0682104	1.09901e-05	0.000214701	LINC01354	lincRNA
ENSG00000227579	2.02999	-0.473842	0.126443	1.1072e-05	0.000215858	AL122019.1	lincRNA
ENSG00000256538	4.6631	-0.329707	0.0870915	1.12666e-05	0.00021898	AC046130.2	lincRNA
ENSG00000259658	8.73225	0.250709	0.0663567	1.13215e-05	0.00021971	AC027559.1	transcribed_unprocessed_pseudogene
ENSG00000250584	27.4745	-0.262173	0.0684096	1.13727e-05	0.000220367	LINC01511	lincRNA
ENSG00000231249	26.2971	-0.159679	0.0401621	1.15883e-05	0.000223067	ITPR1-DT	antisense
ENSG00000258789	16.0391	-0.20308	0.0519611	1.16678e-05	0.000224137	AL162171.2	antisense
ENSG00000247121	60.5254	-0.107373	0.0259979	1.1693e-05	0.000224402	AC009126.1	antisense
ENSG00000236754	211.343	0.272874	0.0730116	1.21423e-05	0.000231192	AC007666.1	antisense
ENSG00000245832	8.31413	0.316602	0.0861958	1.24552e-05	0.000236138	MIR4300HG	lincRNA
ENSG00000261037	21.1511	-0.257005	0.067631	1.24597e-05	0.000236138	AC010266.2	lincRNA
ENSG00000243069	375.822	0.188131	0.0478322	1.27512e-05	0.000240228	ARHGEF26-AS1	processed_transcript
ENSG00000272944	21.1873	-0.263828	0.0696067	1.28183e-05	0.000241372	AC079834.2	antisense
ENSG00000276571	25.8077	0.190514	0.0498022	1.2897e-05	0.000242733	AC002550.2	antisense
ENSG00000263878	145.514	-0.135041	0.0335889	1.30078e-05	0.000244096	DLGAP1-AS4	antisense
ENSG00000241015	94.398	0.15378	0.0389036	1.31046e-05	0.000245549	TPM3P9	transcribed_processed_pseudogene
ENSG00000281404	43.8116	0.171335	0.0439403	1.32715e-05	0.000247404	LINC01176	lincRNA
ENSG00000249476	7.49883	0.254019	0.0679374	1.33138e-05	0.000248004	AC008467.1	lincRNA
ENSG00000272990	47.7064	0.196172	0.051359	1.34491e-05	0.00024979	AC084036.1	antisense
ENSG00000281189	9.02484	-0.230413	0.0604969	1.3523e-05	0.00025104	GHET1	lincRNA
ENSG00000231764	338.393	-0.211174	0.055235	1.35565e-05	0.000251539	DLX6-AS1	antisense
ENSG00000279147	28.9086	0.419533	0.115759	1.36103e-05	0.000252414	AC112504.1	TEC
ENSG00000201699	4.60659	0.28374	0.077266	1.37179e-05	0.000254038	RNU1-59P	snRNA
ENSG00000230246	10.6393	-0.263464	0.07018	1.38367e-05	0.000255741	SPATA31C1	transcribed_unprocessed_pseudogene
ENSG00000226080	14.3562	-0.327124	0.0883688	1.39406e-05	0.00025716	AC062028.2	processed_pseudogene
ENSG00000251410	3.82573	0.484079	0.135677	1.40579e-05	0.000258433	AC007106.1	lincRNA
ENSG00000282390	8.72856	0.268448	0.0724828	1.42066e-05	0.000260679	AL392083.1	sense_intronic
ENSG00000236304	20.5362	0.284452	0.0769031	1.42548e-05	0.00026131	AP001189.1	antisense
ENSG00000228400	8.26645	-0.281647	0.0756284	1.42699e-05	0.000261364	AC079154.1	antisense
ENSG00000258940	6.57569	-0.245106	0.0654369	1.42948e-05	0.000261666	AL132639.2	antisense
ENSG00000259258	9.37131	-0.253141	0.0673247	1.44335e-05	0.000263997	AC013553.1	processed_pseudogene
ENSG00000273356	25.4209	0.221907	0.0589799	1.4576e-05	0.000265409	LINC02019	lincRNA
ENSG00000184809	31.6826	0.163393	0.0420303	1.46239e-05	0.000266026	B3GALT5-AS1	antisense
ENSG00000179066	26.8764	0.24734	0.0665126	1.50359e-05	0.000271631	AC020907.1	lincRNA
ENSG00000255692	12.3323	-0.302393	0.0815881	1.52278e-05	0.000274128	AC002563.1	antisense
ENSG00000248925	10.5337	0.234177	0.0625166	1.52536e-05	0.000274465	AC021087.1	antisense
ENSG00000262384	3.0534	-0.370088	0.101996	1.53006e-05	0.00027505	AC034268.1	processed_pseudogene
ENSG00000272692	12.3714	0.183837	0.0479503	1.55794e-05	0.000279402	AC010997.4	lincRNA
ENSG00000255136	24.6705	-0.208595	0.0548656	1.55992e-05	0.000279624	AP001972.3	lincRNA
ENSG00000263432	8.75842	0.257619	0.0712745	1.56706e-05	0.000280534	RN7SL689P	misc_RNA
ENSG00000226252	21.3143	0.253292	0.0687937	1.60301e-05	0.000285867	AL135960.1	antisense
ENSG00000259771	3.78974	0.381323	0.107979	1.60296e-05	0.000285867	AC092756.1	sense_intronic
ENSG00000236451	15.752	-0.239515	0.0638257	1.60804e-05	0.000286382	AC067956.1	lincRNA
ENSG00000279320	23.5403	0.258628	0.0698945	1.61929e-05	0.000287961	AC069528.2	TEC
ENSG00000225975	41.7503	-0.138803	0.0350714	1.62786e-05	0.00028908	LINC01534	lincRNA
ENSG00000272755	12.5222	0.359574	0.0997111	1.67475e-05	0.000295066	AC245297.2	lincRNA
ENSG00000255087	9.45039	-0.284368	0.0767817	1.6877e-05	0.000296387	AP001993.1	lincRNA
ENSG00000251575	18.038	0.346055	0.0966815	1.70088e-05	0.00029813	C5orf64-AS1	lincRNA
ENSG00000261357	8.56226	0.276109	0.0762469	1.73221e-05	0.000301421	AC099518.2	lincRNA
ENSG00000260163	20.1155	-0.198082	0.0523379	1.73358e-05	0.000301522	AC012508.1	lincRNA
ENSG00000272077	73.5329	0.119349	0.0299434	1.78161e-05	0.000308466	AC124045.1	lincRNA
ENSG00000262902	58.9185	0.322884	0.0900677	1.79199e-05	0.000309841	MTCO1P40	processed_pseudogene
ENSG00000271755	46.6847	-0.14581	0.0372112	1.81311e-05	0.000311933	AL031118.1	lincRNA
ENSG00000257596	8.53396	0.259552	0.0716243	1.84736e-05	0.000316626	SCAT2	antisense
ENSG00000256310	7.43267	-0.300861	0.0820077	1.87604e-05	0.000320443	NDUFA5P6	processed_pseudogene
ENSG00000260750	36.692	-0.186036	0.0489376	1.87776e-05	0.000320593	AC092720.1	lincRNA
ENSG00000183929	7.55854	-0.3199	0.0880009	1.89252e-05	0.00032221	DUSP5P1	processed_pseudogene
ENSG00000205037	93.2673	-0.207775	0.0552351	1.90152e-05	0.000323139	AC134312.1	lincRNA
ENSG00000272768	21.2473	-0.176719	0.0463797	1.93849e-05	0.000328455	AC004854.2	antisense
ENSG00000274560	6.91995	-0.264671	0.0726898	1.94149e-05	0.000328817	AC010205.1	lincRNA
ENSG00000227640	172.912	0.184226	0.0484218	1.95884e-05	0.000331461	SOX21-AS1	lincRNA
ENSG00000272523	33.3358	0.226619	0.0615488	1.97416e-05	0.000333609	LINC01023	lincRNA
ENSG00000272419	77.3415	-0.148587	0.0383637	1.98986e-05	0.000336113	LINC01145	transcribed_unprocessed_pseudogene
ENSG00000281706	24.0596	-0.237058	0.0645843	1.99981e-05	0.000337644	AL009179.1	lincRNA
ENSG00000244479	11.0184	0.275123	0.0767068	2.01501e-05	0.000339909	OR2A1-AS1	antisense
ENSG00000239593	2.5034	0.375631	0.10679	2.03355e-05	0.000342277	AL513122.2	antisense
ENSG00000236901	745.513	-0.185102	0.049131	2.03751e-05	0.00034275	MIR600HG	sense_intronic
ENSG00000223669	1.58175	-0.58358	0.165131	2.04608e-05	0.000343505	AL357033.2	antisense
ENSG00000232759	6.14682	0.309896	0.0872746	2.04627e-05	0.000343505	AC002480.1	antisense
ENSG00000237126	20.362	0.140225	0.0362293	2.05692e-05	0.000344383	AC073254.1	antisense
ENSG00000215057	6.39572	-0.287206	0.079583	2.06934e-05	0.000346069	PKMP5	processed_pseudogene
ENSG00000221817	90.7086	0.205365	0.055691	2.07509e-05	0.000346509	PPP3CB-AS1	processed_transcript
ENSG00000223553	33.0498	-0.254219	0.0695233	2.08509e-05	0.000347436	SMPD4P1	transcribed_unprocessed_pseudogene
ENSG00000231822	14.2065	-0.266204	0.0727499	2.11044e-05	0.000350767	AC019097.1	processed_pseudogene
ENSG00000234929	4.12187	-0.32811	0.0907622	2.14271e-05	0.000354689	AC018685.2	lincRNA
ENSG00000269910	3.26522	0.332891	0.0939274	2.17597e-05	0.000359236	AL049840.2	antisense
ENSG00000231133	26.855	-0.183502	0.0486809	2.20228e-05	0.000362611	HAR1B	lincRNA
ENSG00000224933	0.512812	-0.733619	0.191035	2.21111e-05	0.000363326	LINC01034	lincRNA
ENSG00000272779	15.1856	-0.204446	0.0547309	2.24639e-05	0.000368009	AC245060.4	transcribed_unprocessed_pseudogene
ENSG00000273038	29.0093	0.174263	0.0464802	2.34096e-05	0.00038088	AL365203.2	lincRNA
ENSG00000259953	139.813	-0.139648	0.0365424	2.34686e-05	0.000381675	AL138756.1	sense_overlapping
ENSG00000253807	15.9326	0.219235	0.0604336	2.40474e-05	0.000389024	LINC01170	lincRNA
ENSG00000280304	10.0682	-0.229546	0.0626462	2.4302e-05	0.000392378	AC104260.2	TEC
ENSG00000246640	15.0596	-0.196744	0.0529889	2.48638e-05	0.000399416	PICART1	lincRNA
ENSG00000282022	11.9724	-0.220521	0.0602476	2.49141e-05	0.000400055	AC006581.2	antisense
ENSG00000269883	12.9833	-0.259835	0.0719024	2.52159e-05	0.00040388	AC007375.2	antisense
ENSG00000260852	100.253	0.194153	0.0528286	2.52801e-05	0.000404736	FBXL19-AS1	antisense
ENSG00000272155	13.5613	0.226021	0.0627903	2.56006e-05	0.000408665	AC055822.1	antisense
ENSG00000269918	125.179	0.13458	0.0350869	2.58863e-05	0.000412675	AF131215.6	sense_intronic
ENSG00000229931	24.8867	-0.166587	0.0443895	2.63745e-05	0.000418212	AL137003.1	antisense
ENSG00000227799	39.0553	-0.152632	0.0402994	2.64716e-05	0.000419227	AC012358.2	processed_pseudogene
ENSG00000266258	6.44632	0.275115	0.0785103	2.65247e-05	0.000419545	LINC01909	lincRNA
ENSG00000235510	8.81534	-0.29271	0.0822068	2.67609e-05	0.000422228	BX842568.4	unprocessed_pseudogene
ENSG00000258056	193.963	0.161067	0.0430349	2.69331e-05	0.000424065	AC009779.2	antisense
ENSG00000233532	16.5643	-0.239599	0.0661259	2.71549e-05	0.000426952	LINC00460	lincRNA
ENSG00000272695	52.1204	-0.108682	0.0276282	2.71975e-05	0.000427129	GAS6-DT	lincRNA
ENSG00000245532	14008	0.244923	0.0745887	2.77305e-05	0.000433216	NEAT1	lincRNA
ENSG00000235437	474.116	-0.0939511	0.0252346	2.97462e-05	0.000460734	LINC01278	processed_transcript
ENSG00000229214	19.6456	-0.160871	0.0426595	2.98933e-05	0.000462519	LINC00242	lincRNA
ENSG00000262668	3.63089	-0.308648	0.0880437	2.99718e-05	0.000463473	AJ003147.2	antisense
ENSG00000244215	2.10788	-0.399314	0.114749	3.06965e-05	0.000472758	LINC02016	lincRNA
ENSG00000279778	3.84118	-0.309077	0.0875321	3.07687e-05	0.0004732	AL445437.1	TEC
ENSG00000252179	6.9037	0.424322	0.127837	3.08811e-05	0.000474257	RNA5SP255	rRNA_pseudogene
ENSG00000279255	33.5869	-0.209834	0.0578649	3.12866e-05	0.000479325	Z97653.2	TEC
ENSG00000261840	49.0244	0.187739	0.0517885	3.13002e-05	0.000479341	AC093249.6	antisense
ENSG00000236136	1.2677	0.456143	0.133869	3.13979e-05	0.000480449	ADORA2BP1	processed_pseudogene
ENSG00000203858	18.9856	-0.243102	0.0686206	3.14381e-05	0.000480678	HSD3BP2	unprocessed_pseudogene
ENSG00000233017	4.49264	-0.286146	0.0814843	3.16613e-05	0.00048312	AL121832.1	antisense
ENSG00000264569	20.1769	0.216156	0.0599102	3.19182e-05	0.00048575	DCXR-DT	antisense
ENSG00000265296	4.48018	-0.394477	0.113716	3.21693e-05	0.000488912	FEM1AP2	processed_pseudogene
ENSG00000244425	28.7931	-0.193228	0.0535566	3.24588e-05	0.000492132	RN7SL268P	misc_RNA
ENSG00000279415	4.18572	0.2648	0.0764319	3.27255e-05	0.000495755	AC099494.2	TEC
ENSG00000263146	587.211	0.19979	0.0550819	3.28915e-05	0.000497165	LINC01896	lincRNA
ENSG00000272163	98.0202	-0.147286	0.0393676	3.29014e-05	0.000497165	AF106564.1	antisense
ENSG00000181800	24.2522	-0.253676	0.0716773	3.33503e-05	0.000502049	CELF2-AS1	antisense
ENSG00000213144	54.232	0.175861	0.0480607	3.37739e-05	0.000507622	AC084880.1	processed_pseudogene
ENSG00000250195	2.77927	0.368701	0.109815	3.37975e-05	0.000507777	AC109927.1	antisense
ENSG00000250073	17.2298	0.163336	0.0446444	3.41668e-05	0.000511708	AP000866.2	antisense
ENSG00000226332	50.8055	0.206911	0.0579841	3.57066e-05	0.000528205	AL354836.1	antisense
ENSG00000232727	1.95382	-0.38594	0.112145	3.57227e-05	0.000528205	YWHAEP1	processed_pseudogene
ENSG00000249550	69.9267	-0.132885	0.0350907	3.57402e-05	0.000528205	LINC01234	lincRNA
ENSG00000257270	26.1766	0.181372	0.0500476	3.57331e-05	0.000528205	AL928654.2	antisense
ENSG00000197989	182.483	0.0970611	0.0250638	3.64514e-05	0.000537255	SNHG12	antisense
ENSG00000270112	48.1892	-0.149408	0.0400187	3.67756e-05	0.000541405	AC090241.2	processed_transcript
ENSG00000261242	4.288	-0.235953	0.0670882	3.68946e-05	0.000542108	AL136038.3	antisense
ENSG00000237499	10.4471	0.221164	0.0634704	3.84244e-05	0.000561335	AL357060.1	antisense
ENSG00000229590	0.974118	-0.538188	0.158219	3.84977e-05	0.000561975	MSX2P1	processed_pseudogene
ENSG00000211899	8.23696	-0.00378847	0.0665959	3.89608e-05	0.000567679	IGHM	IG_C_gene
ENSG00000229029	5.31463	-0.337069	0.0978997	3.9319e-05	0.000572646	CDCA4P1	processed_pseudogene
ENSG00000270248	3.30184	0.271342	0.0784861	4.01688e-05	0.000582167	AC011468.4	processed_pseudogene
ENSG00000245248	41.3465	-0.181621	0.0505533	4.03927e-05	0.000583815	USP2-AS1	antisense
ENSG00000228020	9.71065	-0.241058	0.0682739	4.06927e-05	0.000587036	HNRNPA1P46	processed_pseudogene
ENSG00000174028	21.751	-0.25163	0.0723095	4.17723e-05	0.000598526	FAM3C2	processed_pseudogene
ENSG00000246379	56.6322	0.125638	0.0335677	4.18521e-05	0.000599444	AC007495.1	lincRNA
ENSG00000232000	7.61349	-0.193862	0.0544569	4.19659e-05	0.000600171	CLCN3P1	transcribed_unprocessed_pseudogene
ENSG00000170629	98.5877	-0.167696	0.0462466	4.22561e-05	0.000603415	DPY19L2P2	transcribed_unprocessed_pseudogene
ENSG00000260816	98.8662	0.217838	0.0623301	4.22666e-05	0.000603415	AC027279.1	sense_intronic
ENSG00000214659	51.281	-0.233014	0.0667542	4.24921e-05	0.000605875	KRT8P26	processed_pseudogene
ENSG00000273311	17.0277	-0.18752	0.0525114	4.29608e-05	0.000611413	DGCR11	sense_intronic
ENSG00000260583	38.9583	-0.122017	0.0328082	4.43899e-05	0.000627527	AP000223.1	antisense
ENSG00000245694	6.0979	0.270431	0.0798131	4.50126e-05	0.00063468	CRNDE	lincRNA
ENSG00000224897	26.9694	0.158559	0.0439602	4.53024e-05	0.00063782	POT1-AS1	processed_transcript
ENSG00000259914	2.76514	0.356016	0.106502	4.55632e-05	0.000640781	AC009063.1	antisense
ENSG00000281832	1.30269	-0.438541	0.132247	4.56988e-05	0.000641977	LINC00602	lincRNA
ENSG00000277332	8.09227	-0.382789	0.115274	4.58104e-05	0.000643306	AC108002.2	antisense
ENSG00000272434	8.1845	0.33312	0.100236	4.59056e-05	0.000643931	AC137630.3	antisense
ENSG00000255853	4.29738	-0.337592	0.0996026	4.62886e-05	0.000648347	AC006065.1	processed_pseudogene
ENSG00000186369	146.104	-0.152546	0.0414266	4.65658e-05	0.000651435	LINC00643	transcribed_unitary_pseudogene
ENSG00000207773	0.582064	0.757511	0.224206	4.66694e-05	0.000651762	MIR642A	miRNA
ENSG00000271440	3.98747	-0.274719	0.0807209	4.67762e-05	0.000653013	AL121932.1	processed_pseudogene
ENSG00000256424	0.747478	-0.596796	0.17627	4.69891e-05	0.000655746	LINC02414	lincRNA
ENSG00000204934	116.291	-0.0995467	0.0260579	4.77806e-05	0.000663992	ATP6V0E2-AS1	antisense
ENSG00000184414	44.6791	0.307705	0.0936894	4.82222e-05	0.000668864	IRS3P	processed_pseudogene
ENSG00000279227	25.7909	-0.18502	0.0519563	4.90138e-05	0.000677786	AC009303.4	TEC
ENSG00000248593	178.926	0.136273	0.0375065	4.90777e-05	0.000678003	DSTNP2	transcribed_unprocessed_pseudogene
ENSG00000256196	23.9705	-0.182861	0.0518528	4.91007e-05	0.000678003	AP003721.1	antisense
ENSG00000276855	73.3488	0.173041	0.0487918	4.98254e-05	0.000685027	AC015922.3	lincRNA
ENSG00000232803	27.1775	0.268067	0.0801515	5.0758e-05	0.000696339	SLCO4A1-AS1	antisense
ENSG00000231355	25.1486	0.236096	0.069151	5.10717e-05	0.000699635	AP000302.1	antisense
ENSG00000278997	17.2924	0.167981	0.0476185	5.17857e-05	0.000706871	AL662907.1	TEC
ENSG00000237338	8.78962	-0.282039	0.0834199	5.2727e-05	0.000716892	FTCD-AS1	antisense
ENSG00000245213	40.4658	0.145807	0.0403843	5.29224e-05	0.000718778	AC105285.1	antisense
ENSG00000279348	130.462	-0.120851	0.0324492	5.31243e-05	0.000721006	AC012513.3	TEC
ENSG00000255020	40.7978	-0.188522	0.0539413	5.3801e-05	0.000728371	AF131216.3	antisense
ENSG00000273483	41.9632	0.187919	0.053961	5.45919e-05	0.000737767	AL354760.1	antisense
ENSG00000265519	22.7517	0.180927	0.0514285	5.48519e-05	0.000740491	AC015922.2	lincRNA
ENSG00000233502	3.70572	-0.274	0.0817756	5.56415e-05	0.000750086	AC104794.1	lincRNA
ENSG00000226496	11.1987	0.280826	0.084371	5.59147e-05	0.000752969	LINC00323	antisense
ENSG00000161912	284.187	0.119681	0.0323495	5.60916e-05	0.000755084	ADCY10P1	transcribed_unprocessed_pseudogene
ENSG00000269352	50.91	0.131208	0.0359463	5.64218e-05	0.000757921	PTOV1-AS2	antisense
ENSG00000277782	13.6572	-0.231471	0.0674953	5.65737e-05	0.000759425	AC068870.2	lincRNA
ENSG00000263958	75.3259	-0.123081	0.0332787	5.67336e-05	0.000760444	AC091138.1	lincRNA
ENSG00000279676	3.92504	0.339908	0.10594	5.7076e-05	0.000763743	AC011483.3	TEC
ENSG00000235663	8.54991	-0.199858	0.0573507	5.71333e-05	0.000764241	SAPCD1-AS1	antisense
ENSG00000220785	202.259	0.144885	0.040106	5.71824e-05	0.000764629	MTMR9LP	transcribed_unprocessed_pseudogene
ENSG00000197301	5.92915	0.292413	0.0891448	5.73091e-05	0.000765516	HMGA2-AS1	antisense
ENSG00000249176	4.13185	-0.334139	0.101741	5.73913e-05	0.000766345	AC027801.2	processed_pseudogene
ENSG00000262380	6.01181	0.38385	0.121642	5.83036e-05	0.000774992	AC026401.2	sense_intronic
ENSG00000257511	34.1218	0.120063	0.0326036	5.91329e-05	0.000784098	AC084824.1	processed_pseudogene
ENSG00000235802	4.91954	0.268398	0.0806306	5.97017e-05	0.000790264	HCFC1-AS1	antisense
ENSG00000242258	2.40335	-0.595991	0.188131	5.98049e-05	0.000791079	LINC00996	lincRNA
ENSG00000237027	5.41978	0.294048	0.0917082	6.13706e-05	0.000808349	AL159174.1	antisense
ENSG00000237720	21.5092	-0.198066	0.0575147	6.13866e-05	0.000808349	AC011995.2	lincRNA
ENSG00000273056	6.76041	0.215364	0.0632702	6.19806e-05	0.000813961	AL354694.1	lincRNA
ENSG00000272288	57.3742	0.135641	0.0376633	6.2316e-05	0.00081804	AL451165.2	antisense
ENSG00000270725	1.47621	-0.404999	0.125323	6.23597e-05	0.000818114	AL356580.1	lincRNA
ENSG00000177234	63.7303	0.224646	0.0661763	6.24789e-05	0.000818907	LINC01561	lincRNA
ENSG00000260634	9.67295	-0.217037	0.0631535	6.27312e-05	0.000821507	AC012508.2	lincRNA
ENSG00000259985	25.7907	-0.152458	0.0424367	6.3016e-05	0.000824668	AC017100.1	antisense
ENSG00000257815	43.7608	0.14362	0.040159	6.33341e-05	0.000828546	AC025159.1	antisense
ENSG00000250668	13.3603	0.257865	0.0785131	6.41401e-05	0.000837364	LINC02123	lincRNA
ENSG00000228999	2.20472	-0.461171	0.142316	6.60043e-05	0.000857582	AC096570.1	lincRNA
ENSG00000199676	7.87024	0.458351	0.148366	6.62517e-05	0.000859623	RF00019	misc_RNA
ENSG00000180229	1988.61	0.28662	0.0886587	6.67373e-05	0.00086445	HERC2P3	transcribed_unprocessed_pseudogene
ENSG00000223797	140.968	0.137891	0.0385846	6.752e-05	0.00087251	ENTPD3-AS1	antisense
ENSG00000279419	163.954	0.201865	0.0595403	6.79908e-05	0.00087705	AC004925.1	TEC
ENSG00000226862	18.0418	0.176649	0.0520926	6.81474e-05	0.000877476	AC104463.2	antisense
ENSG00000276772	8.39313	0.25058	0.0765976	6.84691e-05	0.000880886	AC025271.4	lincRNA
ENSG00000282511	4.0476	-0.292866	0.0890888	6.98903e-05	0.000893732	CLUHP10	unprocessed_pseudogene
ENSG00000224950	12.2216	0.274382	0.0856209	7.02084e-05	0.000895692	AL390066.1	lincRNA
ENSG00000226791	16.2136	0.163566	0.0471059	7.03696e-05	0.000897148	LINC02611	lincRNA
ENSG00000273032	251.789	-0.171198	0.0492231	7.05629e-05	0.000898709	DGCR9	processed_transcript
ENSG00000260838	101.686	-0.165965	0.0475217	7.12659e-05	0.000905565	AC022893.2	lincRNA
ENSG00000277369	19.5969	-0.155356	0.044173	7.16764e-05	0.000909846	AC010654.1	lincRNA
ENSG00000273186	12.8628	0.206744	0.0615571	7.18687e-05	0.000910768	AL359091.5	sense_intronic
ENSG00000229619	45.9794	-0.122145	0.0335957	7.27311e-05	0.000920003	MBNL1-AS1	antisense
ENSG00000232295	24.2141	0.203429	0.0607818	7.29745e-05	0.00092263	AL589935.1	processed_transcript
ENSG00000226762	31.1615	-0.168776	0.0484174	7.30269e-05	0.000922986	LINC02668	lincRNA
ENSG00000228382	4.02139	0.316479	0.100388	7.3059e-05	0.000923082	ITPKB-IT1	sense_intronic
ENSG00000219755	5.6219	0.287425	0.0892798	7.3546e-05	0.000926777	AL137784.1	processed_pseudogene
ENSG00000279069	15.5801	-0.173373	0.0498445	7.39007e-05	0.000930323	AC015813.5	TEC
ENSG00000260231	64.9043	-0.13603	0.0380545	7.40267e-05	0.000931292	KDM7A-DT	bidirectional_promoter_lncRNA
ENSG00000275898	8.73954	-0.277281	0.0847133	7.41431e-05	0.000931833	AC125603.4	lincRNA
ENSG00000173295	39.0029	-0.210388	0.0620845	7.42504e-05	0.00093195	FAM86B3P	transcribed_unprocessed_pseudogene
ENSG00000224861	9.37783	0.191842	0.0560833	7.42204e-05	0.00093195	YBX1P1	processed_pseudogene
ENSG00000270522	3.62257	0.260071	0.080321	7.61606e-05	0.000950596	AL162713.1	lincRNA
ENSG00000200253	51.5754	0.250859	0.0766055	7.68686e-05	0.000958805	RNU6-529P	snRNA
ENSG00000174171	2.19045	0.349922	0.110529	7.76801e-05	0.000966392	AC020659.1	antisense
ENSG00000246089	58.9855	-0.0907563	0.0243084	7.78085e-05	0.000966725	AC016065.1	antisense
ENSG00000234694	13.9051	0.223994	0.0678678	7.85648e-05	0.000973579	AL139289.2	antisense
ENSG00000253477	64.9882	-0.131377	0.0368671	7.9103e-05	0.000978338	AC012213.1	antisense
ENSG00000267440	4.27523	-0.31884	0.0991215	7.96255e-05	0.000983521	LINC02594	lincRNA
ENSG00000278654	3.37267	-0.332205	0.10273	7.99628e-05	0.000986727	AC007450.4	processed_pseudogene
ENSG00000226342	2.43892	-0.342798	0.106831	8.06382e-05	0.000993129	NMD3P1	processed_pseudogene
ENSG00000270111	59.3967	-0.154752	0.0442641	8.07119e-05	0.000993394	CELF2-DT	lincRNA
ENSG00000234936	4.36617	0.235527	0.072126	8.16461e-05	0.00100262	AC010883.1	antisense
ENSG00000250742	21.2558	0.226746	0.0690339	8.18762e-05	0.00100512	LINC02381	lincRNA
ENSG00000198580	32.165	-0.152067	0.0436074	8.19293e-05	0.00100545	AC073343.1	unprocessed_pseudogene
ENSG00000229196	1.94053	-0.429195	0.138263	8.29706e-05	0.00101407	AC087071.1	antisense
ENSG00000244040	46.2921	-0.152072	0.043098	8.30869e-05	0.00101442	IL12A-AS1	antisense
ENSG00000213433	18.194	0.214015	0.0646713	8.40772e-05	0.0010252	RPLP1P6	transcribed_processed_pseudogene
ENSG00000275465	39.4362	0.226548	0.0691814	8.42251e-05	0.00102634	AL449403.2	lincRNA
ENSG00000273893	41.6869	0.104471	0.028676	8.50657e-05	0.00103563	AL133520.1	sense_intronic
ENSG00000280832	66.0423	-0.10866	0.0300426	8.50688e-05	0.00103563	GSEC	antisense
ENSG00000227091	2.63104	-0.314641	0.0981429	8.53453e-05	0.00103833	AL355990.1	antisense
ENSG00000262006	11.6331	-0.20977	0.0627181	8.59401e-05	0.0010439	AC005920.4	lincRNA
ENSG00000233121	15.834	-0.196688	0.0582857	8.69478e-05	0.00105345	VN1R20P	unitary_pseudogene
ENSG00000215097	7.82911	-0.241467	0.0738006	8.7262e-05	0.00105591	DUSP8P3	processed_pseudogene
ENSG00000222924	2.29199	-0.331329	0.105289	8.73482e-05	0.00105662	RNU6-1148P	snRNA
ENSG00000235285	2.45441	-0.328352	0.102745	8.79059e-05	0.00106194	SMIM2-IT1	sense_intronic
ENSG00000172971	10.6459	-0.287699	0.0900057	8.85233e-05	0.00106778	UNC93B3	unprocessed_pseudogene
ENSG00000249854	0.932257	0.51157	0.180359	8.87511e-05	0.00106917	CDH18-AS1	lincRNA
ENSG00000234080	1.65146	-0.381587	0.120271	8.88976e-05	0.0010706	AL596275.1	processed_pseudogene
ENSG00000224172	0.760453	-0.509131	0.161096	8.91362e-05	0.00107313	AC091799.1	processed_pseudogene
ENSG00000221953	35.8055	0.157081	0.045917	8.95609e-05	0.00107688	C1orf229	lincRNA
ENSG00000227906	70.4052	0.113092	0.0317305	9.2558e-05	0.00110697	SNAP25-AS1	antisense
ENSG00000260911	55.5514	0.189498	0.0565807	9.26319e-05	0.00110751	AC135050.3	lincRNA
ENSG00000253122	1.75255	-0.361913	0.114251	9.3127e-05	0.00111238	AC025366.1	lincRNA
ENSG00000274031	24.0025	0.198066	0.0596931	9.32963e-05	0.00111405	AC092140.2	antisense
ENSG00000203721	9.51866	0.268104	0.0849159	9.34815e-05	0.00111591	LINC00862	lincRNA
ENSG00000255542	7.15079	0.243158	0.076299	9.41486e-05	0.00112177	AC090625.2	antisense
ENSG00000235026	140.504	-0.11601	0.0323279	9.43886e-05	0.00112357	DPP10-AS1	antisense
ENSG00000226038	15.6666	-0.177476	0.0524681	9.46056e-05	0.0011251	PPIAP21	processed_pseudogene
ENSG00000266916	44.1138	0.133233	0.0379617	9.47931e-05	0.00112697	ZNF793-AS1	antisense
ENSG00000261710	57.2152	0.230052	0.070749	9.52779e-05	0.00113168	AC104417.2	lincRNA
ENSG00000260464	44.909	-0.164029	0.0476459	9.54035e-05	0.00113282	AL049796.1	bidirectional_promoter_lncRNA
ENSG00000259219	14.2503	0.238629	0.0751119	9.57494e-05	0.00113657	AC084855.2	antisense
ENSG00000241782	13.9572	0.264851	0.0841254	9.60806e-05	0.00113979	AP002812.1	processed_pseudogene
ENSG00000254703	15.2233	0.229748	0.0715911	9.65543e-05	0.00114434	SENCR	antisense
ENSG00000277159	55.2596	-0.171068	0.0504843	9.71081e-05	0.00114983	AL139384.2	lincRNA
ENSG00000235478	41.0249	-0.128924	0.0366619	9.73317e-05	0.00115169	LINC01664	lincRNA
ENSG00000241622	4.84311	-0.271912	0.0851719	9.92613e-05	0.00116986	RARRES2P1	processed_pseudogene
ENSG00000261253	15.0507	0.0594496	0.066534	9.96851e-05	0.00117413	AC137932.2	processed_transcript
ENSG00000225792	17.1593	0.205625	0.0632101	0.000100064	0.00117677	AC004540.2	antisense
ENSG00000250101	2.38356	-0.335411	0.106903	0.000101133	0.00118751	AC106795.3	lincRNA
ENSG00000254746	36.6302	0.180946	0.0540986	0.000101364	0.00118875	AC103855.2	processed_transcript
ENSG00000278916	6.01086	-0.190742	0.057275	0.000101742	0.00119281	CEP83-DT	lincRNA
ENSG00000223812	110.629	-0.176309	0.0525106	0.000104075	0.00121568	AC073365.1	lincRNA
ENSG00000276148	35.5948	0.196811	0.0602726	0.000104162	0.00121632	AC084824.5	antisense
ENSG00000267788	4.43311	0.341067	0.114224	0.000105543	0.00122981	AC015936.2	lincRNA
ENSG00000260276	57.6026	0.185393	0.0567597	0.000105804	0.00123247	AC022167.2	antisense
ENSG00000248540	49.9747	0.190897	0.0589286	0.000106001	0.00123401	AC010931.2	lincRNA
ENSG00000174680	33.3726	0.172202	0.051797	0.000106453	0.00123843	GRIK1-AS1	antisense
ENSG00000234882	57.2782	-0.131794	0.037502	0.000108088	0.00125104	EIF3EP1	processed_pseudogene
ENSG00000240270	3.71507	0.474045	0.159655	0.000108078	0.00125104	RPL12P37	processed_pseudogene
ENSG00000240338	9.05139	0.228591	0.0720793	0.000108843	0.0012586	AC009078.2	transcribed_unprocessed_pseudogene
ENSG00000203364	0.535454	0.790141	0.253312	0.000108984	0.0012591	AL390760.1	lincRNA
ENSG00000224924	380.423	0.192332	0.0585293	0.00010957	0.00126365	LINC00320	lincRNA
ENSG00000237575	33.0097	0.188757	0.0577175	0.000112638	0.0012923	PYY2	transcribed_unprocessed_pseudogene
ENSG00000273209	7.44083	0.256181	0.0814154	0.000113044	0.00129579	AC069148.1	lincRNA
ENSG00000227039	26.4793	0.221829	0.0691835	0.000113216	0.00129659	ITGB2-AS1	antisense
ENSG00000249626	45.8056	-0.143669	0.0419555	0.000113207	0.00129659	AC024560.2	processed_pseudogene
ENSG00000213644	1.17488	-0.495619	0.164664	0.000113909	0.00130334	SAPCD2P1	processed_pseudogene
ENSG00000251994	1.56636	-0.352179	0.113736	0.000115271	0.00131576	RNU2-27P	snRNA
ENSG00000266501	1.85975	0.378151	0.127157	0.000115321	0.00131594	AC025198.1	processed_pseudogene
ENSG00000186615	45.0341	-0.151317	0.0442308	0.000117486	0.00133744	KTN1-AS1	antisense
ENSG00000203809	8.74107	-0.202011	0.061286	0.000117619	0.00133815	LIN28B-AS1	lincRNA
ENSG00000234072	141.577	0.117921	0.0336753	0.000119117	0.00135035	AC074117.1	antisense
ENSG00000216915	3.28889	-0.315271	0.101657	0.000119446	0.00135368	GPR89P	processed_pseudogene
ENSG00000182722	15.3377	-0.189234	0.057124	0.000120084	0.00135888	SEPHS1P1	processed_pseudogene
ENSG00000240032	2.91558	0.337151	0.111473	0.000120419	0.00136106	LNCSRLR	antisense
ENSG00000206337	56.5469	0.18678	0.0575785	0.000124375	0.00139995	HCP5	sense_overlapping
ENSG00000197291	49.5168	0.160365	0.0482601	0.000124671	0.00140204	RAMP2-AS1	lincRNA
ENSG00000225106	11.0023	-0.282066	0.0909636	0.000126157	0.00141457	AL162457.2	antisense
ENSG00000154316	17.9739	-0.164967	0.0494583	0.000126293	0.00141526	TDH	transcribed_unitary_pseudogene
ENSG00000230725	10.7554	-0.211025	0.0653402	0.000127237	0.00142123	AL035252.2	lincRNA
ENSG00000256185	11.2079	0.178803	0.0546373	0.000127181	0.00142123	AC055720.2	3prime_overlapping_ncRNA
ENSG00000230393	10.8666	-0.201489	0.0629277	0.000127742	0.00142477	AC092667.1	antisense
ENSG00000233705	600.979	-0.172092	0.0521859	0.000128768	0.00143245	SLC26A4-AS1	antisense
ENSG00000234043	11.0651	-0.15993	0.047974	0.000128813	0.00143253	NUDT9P1	processed_pseudogene
ENSG00000258731	8.38518	-0.234791	0.0744862	0.000128895	0.00143302	AL356020.1	antisense
ENSG00000207922	0.780781	0.551609	0.202396	0.000129408	0.00143788	AC104450.1	miRNA
ENSG00000255910	5.59577	-0.23634	0.075318	0.000130046	0.00144294	AC024901.1	lincRNA
ENSG00000272142	7.07822	0.1906	0.0591597	0.000130951	0.00144953	AL359643.3	lincRNA
ENSG00000226695	2.05557	-0.4053	0.132574	0.000131638	0.00145544	ANKRD20A10P	processed_pseudogene
ENSG00000260469	8.98844	-0.18804	0.0577595	0.00013213	0.00145918	INSYN1-AS1	lincRNA
ENSG00000278266	26.268	-0.144517	0.0427651	0.000133428	0.0014718	AC079949.2	lincRNA
ENSG00000258499	4.90599	0.23021	0.073732	0.000133874	0.0014763	LINC02287	lincRNA
ENSG00000269776	1.44866	-0.379517	0.126008	0.000134153	0.00147852	DPPA5P1	processed_pseudogene
ENSG00000274670	3.83497	0.389482	0.137119	0.000134198	0.00147858	AC137590.2	lincRNA
ENSG00000268257	10.7619	-0.188759	0.0582984	0.000135154	0.0014874	AIRN	antisense
ENSG00000232056	2.95991	-0.282712	0.0922684	0.000136312	0.00149841	AC092687.1	lincRNA
ENSG00000264196	4.51023	0.312094	0.104656	0.000136281	0.00149841	AC011120.1	antisense
ENSG00000248479	1.73417	-0.36235	0.11938	0.000136914	0.00150416	AC104137.1	lincRNA
ENSG00000279923	50.1975	-0.111658	0.0318395	0.000137822	0.00151326	AC022417.1	TEC
ENSG00000278532	7.57308	-0.202324	0.0629183	0.000140186	0.00153346	AC026585.1	lincRNA
ENSG00000273687	7.52223	0.200009	0.0631376	0.000140519	0.00153622	AC004223.4	antisense
ENSG00000204959	4.97555	0.24896	0.0808659	0.000140833	0.00153877	ARHGEF34P	unprocessed_pseudogene
ENSG00000227455	9.13991	0.215721	0.0690597	0.000141002	0.00154002	AL450345.1	lincRNA
ENSG00000267374	4.45459	-0.305038	0.101191	0.0001428	0.00155535	AC016205.1	lincRNA
ENSG00000235865	135.477	0.191722	0.0596882	0.000143056	0.00155688	GSN-AS1	antisense
ENSG00000206187	13.3832	-0.199348	0.0623175	0.000143605	0.00156144	LINC02346	lincRNA
ENSG00000259543	1.40016	-0.412593	0.138028	0.00014435	0.00156864	AC060809.1	lincRNA
ENSG00000231752	9.16223	-0.221554	0.0695808	0.000146743	0.00158701	EMBP1	transcribed_unprocessed_pseudogene
ENSG00000259826	41.8878	-0.100738	0.0284688	0.000146981	0.00158862	AC072061.1	antisense
ENSG00000261625	3.7719	0.315413	0.106557	0.000148483	0.00160212	AP003071.4	sense_overlapping
ENSG00000257556	63.1288	-0.134485	0.0397524	0.00014897	0.00160646	LINC02298	lincRNA
ENSG00000263335	11.9388	0.242078	0.0790056	0.000150874	0.00162469	AF001548.2	antisense
ENSG00000228408	16.0708	0.341088	0.114338	0.000151349	0.00162811	AL031056.1	lincRNA
ENSG00000204622	4.69194	0.278986	0.0917111	0.000153521	0.00164713	HLA-J	transcribed_unprocessed_pseudogene
ENSG00000236939	43.3	-0.150326	0.045317	0.000154614	0.00165606	BAALC-AS2	antisense
ENSG00000267142	9.96331	-0.219171	0.0695224	0.000154658	0.00165606	AC092296.2	processed_pseudogene
ENSG00000067601	79.5895	-0.0930191	0.0261351	0.000155888	0.0016669	PMS2P4	transcribed_unprocessed_pseudogene
ENSG00000249244	8.48663	-0.242446	0.0786307	0.000157993	0.00168798	AC110373.1	unprocessed_pseudogene
ENSG00000260418	328.06	0.169127	0.051136	0.000158267	0.00168901	AL023284.4	lincRNA
ENSG00000224189	42.9393	0.210021	0.0668551	0.000158391	0.00168939	HAGLR	antisense
ENSG00000274767	24.5612	-0.308087	0.102919	0.000158703	0.00169216	AC243829.1	antisense
ENSG00000227825	82.7955	-0.201704	0.0637614	0.000160145	0.00170475	SLC9A7P1	transcribed_processed_pseudogene
ENSG00000254477	5.80099	-0.217646	0.0694873	0.000160821	0.00171099	AP000640.1	processed_transcript
ENSG00000273724	4.97884	0.252158	0.0837789	0.000161027	0.00171223	AC106782.5	unprocessed_pseudogene
ENSG00000205622	11.4589	0.179553	0.0563034	0.000161975	0.0017199	AP001043.1	lincRNA
ENSG00000271163	0.884028	0.453374	0.159335	0.000163224	0.00173075	AC004840.2	processed_pseudogene
ENSG00000255517	53.5091	0.11305	0.0327632	0.000163679	0.00173461	AP002748.3	antisense
ENSG00000261647	5.23595	-0.263165	0.0861022	0.000166238	0.0017578	IMPDH1P11	processed_pseudogene
ENSG00000224177	3.31341	-0.246371	0.0800654	0.000171433	0.00180421	LINC00570	lincRNA
ENSG00000272909	38.1643	0.0566122	0.0456297	0.000171386	0.00180421	AL122035.2	antisense
ENSG00000232560	8.33483	0.23665	0.077805	0.000172151	0.00181127	LINC01549	lincRNA
ENSG00000248019	116.876	0.1235	0.0365525	0.000173126	0.00181989	FAM13A-AS1	antisense
ENSG00000240253	15.1863	-0.209758	0.0667508	0.000174018	0.00182688	FAR2P3	transcribed_unprocessed_pseudogene
ENSG00000188599	377.84	0.188397	0.0595853	0.000175261	0.00183789	NPIPP1	transcribed_unprocessed_pseudogene
ENSG00000279879	12.5184	-0.198184	0.0637777	0.000178628	0.00186857	AC091152.4	TEC
ENSG00000270720	9.30172	0.173395	0.0543565	0.00018006	0.00188045	AC104785.1	lincRNA
ENSG00000240520	5.36918	-0.225633	0.0727693	0.000180208	0.00188148	UOX	transcribed_unitary_pseudogene
ENSG00000179818	559.776	0.109976	0.0320289	0.000180513	0.00188208	PCBP1-AS1	processed_transcript
ENSG00000280515	1.36938	0.405624	0.144607	0.000180461	0.00188208	SALRNA2	lincRNA
ENSG00000198868	11.0026	0.274811	0.0939796	0.000181026	0.00188589	MTND4LP30	processed_pseudogene
ENSG00000253771	101.131	-0.117486	0.0345913	0.000181565	0.00188994	TPTE2P1	transcribed_unprocessed_pseudogene
ENSG00000270903	7.94812	-0.226002	0.0733791	0.000182778	0.0019005	HNRNPA3P9	processed_pseudogene
ENSG00000251015	6.45615	0.255508	0.0864938	0.000183226	0.00190463	SLC25A30-AS1	lincRNA
ENSG00000254691	8.36346	0.240743	0.0804788	0.000183761	0.00190758	AP002812.3	antisense
ENSG00000233928	4.68229	-0.228892	0.0740633	0.000187284	0.00193466	AL591501.1	lincRNA
ENSG00000226644	10.098	-0.211215	0.0680228	0.000188286	0.00194395	AL121899.1	lincRNA
ENSG00000258794	7.46457	-0.268768	0.0890093	0.000189298	0.00195281	DUX4L27	processed_pseudogene
ENSG00000186960	174.524	-0.0989696	0.0285991	0.000189419	0.00195301	LINC01551	lincRNA
ENSG00000268592	9.93938	-0.302794	0.103213	0.000194804	0.00199986	AL355312.3	antisense
ENSG00000261269	114.654	0.201518	0.0666756	0.000195371	0.00200387	AC093278.2	sense_overlapping
ENSG00000265888	2.79255	-0.288222	0.0975931	0.000195813	0.00200696	DSCAS	antisense
ENSG00000259577	26.9566	-0.184926	0.0585651	0.000197249	0.00201896	CERNA1	lincRNA
ENSG00000253282	5.34794	-0.217225	0.0706414	0.000198219	0.00202726	AP001330.1	lincRNA
ENSG00000271009	17.4726	0.210293	0.0692348	0.000199004	0.00203365	AC116667.1	lincRNA
ENSG00000235205	1.93137	-0.393064	0.135658	0.000199064	0.00203371	TATDN2P3	processed_pseudogene
ENSG00000250320	29.707	-0.106831	0.0312205	0.00019991	0.00203811	AC113383.1	antisense
ENSG00000260912	174.735	0.167649	0.0528364	0.00019985	0.00203811	AL158206.1	sense_overlapping
ENSG00000234229	4.27693	0.24343	0.0822799	0.000200343	0.0020402	LINC01505	lincRNA
ENSG00000204556	14.2003	0.202799	0.0658548	0.000200606	0.00204179	AL450124.1	unprocessed_pseudogene
ENSG00000267369	11.4881	0.305714	0.106374	0.0002027	0.00205925	AC015911.7	processed_pseudogene
ENSG00000230992	5.06695	-0.278099	0.093089	0.000203277	0.00206324	FAM201B	processed_pseudogene
ENSG00000253300	1.70062	-0.397034	0.139223	0.000203702	0.00206612	AC018541.1	lincRNA
ENSG00000279026	143.208	0.112937	0.0334488	0.000204011	0.00206816	AC005225.4	TEC
ENSG00000272567	3.71194	0.277491	0.0940069	0.000205615	0.0020822	AC109347.2	lincRNA
ENSG00000269973	165.617	0.100932	0.0288234	0.000206261	0.00208818	AC010969.2	lincRNA
ENSG00000261616	45.5602	0.132111	0.0399318	0.000206409	0.00208884	AC036108.3	antisense
ENSG00000251022	448.798	-0.142893	0.0439224	0.000206708	0.00209104	THAP9-AS1	antisense
ENSG00000256947	16.3026	0.324372	0.114264	0.000207145	0.0020949	AP002518.2	antisense
ENSG00000267107	129.559	0.233552	0.0783174	0.000210029	0.00211787	PCAT19	lincRNA
ENSG00000226443	6.116	-0.241565	0.0797818	0.000210487	0.00212137	GAPDHP32	processed_pseudogene
ENSG00000256508	2.5178	0.297189	0.102902	0.000210808	0.00212404	MRGPRF-AS1	antisense
ENSG00000255045	37.2486	-0.164672	0.0515074	0.000211685	0.00213175	AP000866.5	antisense
ENSG00000232406	228.851	-0.116243	0.0340787	0.000214807	0.00216034	AL121895.1	antisense
ENSG00000232487	8.29826	0.190987	0.0630216	0.000215511	0.00216627	RASA3-IT1	sense_intronic
ENSG00000235652	125.774	-0.113056	0.033526	0.000215681	0.0021674	AL356599.1	antisense
ENSG00000203875	599.828	0.112967	0.0341442	0.000216061	0.00216893	SNHG5	processed_transcript
ENSG00000241163	21.1395	0.200643	0.0661604	0.000216435	0.00217154	LINC00877	lincRNA
ENSG00000231863	26.2417	-0.146558	0.0455417	0.000216767	0.00217315	AL139393.1	antisense
ENSG00000259134	13.4318	0.193162	0.063201	0.000219468	0.0021956	LINC00924	lincRNA
ENSG00000260855	63.9348	-0.114567	0.034041	0.000219577	0.00219611	AL591848.4	lincRNA
ENSG00000258404	2.38638	-0.294332	0.100387	0.000219707	0.00219684	LINC02320	lincRNA
ENSG00000273381	20.2947	0.132249	0.0404155	0.000220526	0.00220156	AL158071.5	lincRNA
ENSG00000220256	6.02305	-0.200816	0.0655506	0.000221195	0.00220592	AC093802.1	lincRNA
ENSG00000280193	30.9475	-0.14755	0.0454806	0.000221995	0.00221216	AC132219.2	TEC
ENSG00000265975	0.806438	0.492375	0.180759	0.00022207	0.00221232	AC002091.1	lincRNA
ENSG00000261411	2.58391	-0.266842	0.0908185	0.000222961	0.00222032	AL161938.1	lincRNA
ENSG00000233929	19.5532	0.216858	0.0724343	0.000223387	0.00222312	MT1XP1	processed_pseudogene
ENSG00000225208	4.39439	-0.203622	0.0666508	0.000223767	0.00222574	AL133387.1	lincRNA
ENSG00000272209	2.94347	0.296673	0.102449	0.000224756	0.00223441	AL023583.1	lincRNA
ENSG00000260395	19.6371	0.292612	0.102651	0.000225	0.00223461	AC092119.1	processed_pseudogene
ENSG00000225280	3.16445	0.446897	0.159084	0.000225225	0.00223615	AL158013.1	antisense
ENSG00000249781	4.2431	-0.297821	0.105095	0.000226549	0.00224754	LINC02112	lincRNA
ENSG00000248514	15.7282	-0.168724	0.0535796	0.000227061	0.00224969	AC008443.4	antisense
ENSG00000255240	1.91388	0.366193	0.132157	0.000228661	0.00226082	AP001636.3	antisense
ENSG00000231152	1.50095	0.450963	0.168994	0.000230043	0.00226978	MTND2P15	processed_pseudogene
ENSG00000276650	0.66929	-0.599834	0.202404	0.000229968	0.00226978	AC022202.1	unprocessed_pseudogene
ENSG00000229537	3.3522	0.298843	0.104763	0.000231275	0.00227656	LINC01739	lincRNA
ENSG00000251621	7.94921	-0.275789	0.0935886	0.000235935	0.00231053	AC009487.3	3prime_overlapping_ncRNA
ENSG00000246100	67.026	-0.108765	0.0321717	0.000236645	0.00231589	LINC00900	lincRNA
ENSG00000242140	0.714715	-0.45405	0.159	0.000237069	0.00231809	AC083904.1	processed_pseudogene
ENSG00000236397	63.769	0.23413	0.0789432	0.000238674	0.00233076	DDX11L2	unprocessed_pseudogene
ENSG00000253567	10.8261	-0.214549	0.0720028	0.000239136	0.00233407	AC025871.1	antisense
ENSG00000253452	5.13719	-0.25315	0.0866832	0.000239521	0.00233663	AC100818.1	lincRNA
ENSG00000238058	39.0704	-0.113612	0.0340967	0.000240324	0.00234267	AL355574.1	bidirectional_promoter_lncRNA
ENSG00000234707	2.07265	-0.346945	0.123585	0.000241391	0.00235126	AC074351.1	antisense
ENSG00000281100	45.9154	-0.126131	0.0384764	0.000241876	0.00235478	AC105749.1	TEC
ENSG00000270419	94.857	0.152547	0.0479962	0.000242537	0.00236001	CAHM	lincRNA
ENSG00000260743	21.0865	0.16294	0.0523193	0.000247163	0.00240072	AC007823.1	lincRNA
ENSG00000232300	35.4794	0.299057	0.106039	0.000247715	0.00240302	FAM215B	lincRNA
ENSG00000264714	25.9593	-0.199291	0.0665797	0.000249106	0.00241344	KIAA0895LP1	transcribed_processed_pseudogene
ENSG00000237154	4.36994	-0.242164	0.0819944	0.000250482	0.0024243	MCFD2P1	processed_pseudogene
ENSG00000269997	10.5891	-0.211766	0.0704736	0.000250697	0.00242576	AC068790.3	sense_intronic
ENSG00000224367	3.81991	-0.236227	0.0800536	0.000256131	0.00246643	OACYLP	transcribed_unitary_pseudogene
ENSG00000265874	2.11946	0.295391	0.104448	0.000256566	0.00246937	MIR4489	miRNA
ENSG00000246859	53.1209	-0.164613	0.0525437	0.000258627	0.00248669	STARD4-AS1	antisense
ENSG00000253805	12.8486	-0.271867	0.0938129	0.000259212	0.00249106	AC245164.1	lincRNA
ENSG00000271207	3.30718	0.281137	0.101003	0.000259869	0.00249485	MTCO1P22	processed_pseudogene
ENSG00000272476	8.84583	-0.172705	0.0558088	0.000260079	0.0024956	AL024507.2	antisense
ENSG00000227467	33.9404	-0.140239	0.0436292	0.000262377	0.00251512	LINC01537	lincRNA
ENSG00000236489	1.12601	-0.384907	0.137501	0.000263756	0.00252388	AC133473.1	processed_pseudogene
ENSG00000227733	53.8514	-0.179232	0.0581948	0.000264436	0.00252912	AC239809.3	lincRNA
ENSG00000249673	204.135	-0.102077	0.0303507	0.000265185	0.00253438	NOP14-AS1	antisense
ENSG00000272468	5.27615	0.253092	0.088779	0.000268574	0.00256226	AL021807.1	lincRNA
ENSG00000162699	2.66632	-0.339894	0.120776	0.000269678	0.00257015	DNAJA1P5	processed_pseudogene
ENSG00000186162	530.67	-0.0789671	0.0230065	0.000270438	0.00257552	CIDECP1	transcribed_unprocessed_pseudogene
ENSG00000272983	71.1913	-0.109845	0.0335539	0.000271839	0.00258757	AL117339.4	lincRNA
ENSG00000227719	34.9759	-0.202492	0.0673651	0.000274159	0.00260639	AC006042.1	antisense
ENSG00000220884	2.07347	-0.322405	0.112995	0.00027785	0.00263031	MESTP1	processed_pseudogene
ENSG00000235665	16.4471	0.166663	0.0548582	0.000278732	0.00263735	LINC00298	lincRNA
ENSG00000276261	42.6448	0.222258	0.0767974	0.000280239	0.00264898	AC009509.4	antisense
ENSG00000223711	2.99363	-0.282663	0.0987098	0.00028164	0.00265792	AC069213.1	antisense
ENSG00000266075	4.14723	0.233137	0.0804499	0.000282058	0.00266022	RN7SL574P	misc_RNA
ENSG00000245156	41.3502	0.198968	0.0673138	0.000283123	0.00266696	AP001107.1	lincRNA
ENSG00000273669	2.23806	-0.293995	0.103912	0.000283855	0.0026725	AC015819.1	lincRNA
ENSG00000234303	4.88834	0.282287	0.101381	0.000284423	0.00267602	CLYBL-AS1	antisense
ENSG00000259153	64.5562	-0.142451	0.0448219	0.000284519	0.00267614	AC004816.1	lincRNA
ENSG00000269945	168.636	-0.138078	0.0431859	0.000285049	0.00268046	AC004817.4	lincRNA
ENSG00000248527	23110.8	0.218895	0.0701015	0.000287607	0.00269918	MTATP6P1	unprocessed_pseudogene
ENSG00000272395	2.30025	-0.322616	0.115932	0.000292751	0.00273666	IFNL4	polymorphic_pseudogene
ENSG00000275830	51.1231	0.248154	0.0882382	0.000294337	0.00274723	AL355974.2	lincRNA
ENSG00000205035	116.885	-0.139237	0.0436539	0.000295817	0.00275584	AC136759.1	transcribed_unprocessed_pseudogene
ENSG00000277977	15.5092	0.149317	0.0490628	0.000301597	0.00280078	AC010332.1	unprocessed_pseudogene
ENSG00000274664	2.55562	-0.357765	0.130692	0.000302953	0.00281047	AP005019.2	processed_pseudogene
ENSG00000270218	1.8407	-0.326212	0.117736	0.00030385	0.00281689	AC013553.2	processed_pseudogene
ENSG00000274427	7.33307	0.215051	0.0759043	0.000304706	0.00282414	AC145423.2	sense_intronic
ENSG00000233559	92.9135	0.262191	0.0934626	0.000306611	0.00283488	LINC00513	lincRNA
ENSG00000105694	13.4411	0.291051	0.106482	0.000307958	0.0028425	ELOCP28	processed_pseudogene
ENSG00000278041	164.058	0.158256	0.0513517	0.00031032	0.00286223	AL133325.3	lincRNA
ENSG00000236116	15.9824	0.316902	0.116149	0.000310904	0.00286553	AC064853.1	antisense
ENSG00000240207	119.337	-0.141394	0.0450381	0.000311305	0.00286852	AC080013.1	antisense
ENSG00000273987	14.3508	0.162939	0.0532763	0.000313978	0.00288745	AC121761.2	sense_intronic
ENSG00000197536	152.288	0.0940465	0.0282222	0.000316665	0.00290532	C5orf56	processed_transcript
ENSG00000261251	10.1393	-0.15308	0.0495522	0.000316672	0.00290532	Z97055.2	antisense
ENSG00000251299	1.56119	-0.361066	0.134473	0.000317117	0.0029087	SLC25A15P3	unprocessed_pseudogene
ENSG00000243902	68.3238	-0.176717	0.0586209	0.000317924	0.0029147	FP325335.1	sense_overlapping
ENSG00000279113	75.4848	-0.137411	0.0435894	0.000319109	0.00292416	AC148477.7	TEC
ENSG00000254944	6.86422	-0.226931	0.0777323	0.00032143	0.00294259	ATP5PBP5	processed_pseudogene
ENSG00000267079	4.78201	0.271472	0.0974786	0.000322302	0.00294702	AP001269.2	lincRNA
ENSG00000223528	13.586	0.260729	0.0940344	0.000324949	0.00296838	AL359094.1	antisense
ENSG00000271860	88.907	0.130362	0.0416116	0.000326448	0.00297992	AL589740.1	lincRNA
ENSG00000245526	738.849	-0.0759089	0.0221847	0.000327585	0.00298578	LINC00461	lincRNA
ENSG00000228031	2.29724	-0.303463	0.108785	0.000327734	0.00298593	AC078842.1	lincRNA
ENSG00000277287	19.5522	0.19697	0.0681463	0.000328917	0.00299192	AL109976.1	lincRNA
ENSG00000229694	6.03186	0.212581	0.0743739	0.000331125	0.00300747	AL158071.1	lincRNA
ENSG00000273599	85.8168	0.152194	0.0491426	0.000333574	0.00302538	AL731571.1	antisense
ENSG00000272719	1.428	0.350955	0.131835	0.000333749	0.00302606	AC006483.2	antisense
ENSG00000261434	3.08497	-0.256391	0.0910433	0.000337568	0.00305505	AC021087.4	sense_overlapping
ENSG00000236914	11.8972	-0.145883	0.046954	0.000338011	0.00305834	LINC01852	lincRNA
ENSG00000269959	34.3791	0.191338	0.064861	0.000338862	0.00306384	SPACA6P-AS	lincRNA
ENSG00000282164	436.043	-0.167865	0.0556347	0.000339722	0.00307025	PEG13	sense_intronic
ENSG00000225889	79.0625	0.177114	0.0591634	0.000341152	0.00308089	AC012368.1	antisense
ENSG00000232177	12.9314	0.253274	0.092253	0.000342167	0.00308932	MTND4P24	processed_pseudogene
ENSG00000272217	16.9666	0.237103	0.0848519	0.000345531	0.00311368	AL645940.1	lincRNA
ENSG00000247675	31.6253	0.160315	0.0532965	0.000345823	0.00311494	LRP4-AS1	antisense
ENSG00000271936	13.7493	0.149913	0.0491107	0.000346377	0.0031192	AC012073.1	antisense
ENSG00000205632	41.3497	-0.173427	0.0578424	0.000346612	0.00311984	LINC01310	lincRNA
ENSG00000230910	1018.52	-0.10489	0.0320437	0.000347699	0.00312814	AL391807.1	processed_transcript
ENSG00000239481	2.19116	-0.301208	0.110471	0.00034956	0.00313895	RPS3AP41	processed_pseudogene
ENSG00000231721	623.753	0.067823	0.019943	0.000350459	0.00314554	LINC-PINT	processed_transcript
ENSG00000281392	27.6527	-0.103983	0.0317719	0.000352671	0.00316241	AC107204.1	lincRNA
ENSG00000261051	13.6953	0.212813	0.0741752	0.000353005	0.00316391	AC107021.2	sense_overlapping
ENSG00000248124	277.166	-0.0911143	0.0273593	0.000353541	0.00316797	RRN3P1	transcribed_unprocessed_pseudogene
ENSG00000250982	6.43475	-0.199742	0.0689414	0.000356978	0.003192	GAPDHP35	processed_pseudogene
ENSG00000257434	7.28072	-0.327473	0.118765	0.000357663	0.00319737	AC073525.1	antisense
ENSG00000279360	8.29342	0.21237	0.0747733	0.000360366	0.00321323	AC007546.2	TEC
ENSG00000258858	1.74423	-0.316883	0.11662	0.000361952	0.00322435	AL583722.4	antisense
ENSG00000260416	0.858697	-0.486741	0.180275	0.000362143	0.0032253	AL096828.2	lincRNA
ENSG00000257585	9.95608	0.205859	0.0720141	0.000362615	0.003228	LINC00609	lincRNA
ENSG00000270077	17.5091	0.318611	0.120178	0.000363948	0.00323759	AP003117.1	sense_intronic
ENSG00000264112	327.517	-0.144811	0.0470724	0.000365185	0.00324632	AC015813.1	lincRNA
ENSG00000224594	0.617738	0.49505	0.188408	0.000368425	0.0032713	RPL29P19	processed_pseudogene
ENSG00000207167	1.46753	0.377654	0.146354	0.000368739	0.00327251	RNU6-1340P	snRNA
ENSG00000278126	52.7083	0.148534	0.0487096	0.000370774	0.00328678	AC139768.2	sense_intronic
ENSG00000260757	0.668355	-0.475977	0.175187	0.000371063	0.00328858	AC093520.1	sense_overlapping
ENSG00000254406	2.5632	-0.299447	0.109275	0.000371644	0.00329296	AP001994.1	processed_pseudogene
ENSG00000273394	1.96191	-0.298352	0.108526	0.000372196	0.00329709	AC128687.2	antisense
ENSG00000280415	1.3676	-0.361506	0.134119	0.00037468	0.00331447	AC005252.3	TEC
ENSG00000212232	15.9166	0.300005	0.112167	0.000377849	0.0033375	SNORD17	snoRNA
ENSG00000215162	2.61806	-0.322194	0.119789	0.000377899	0.0033375	LINC00269	lincRNA
ENSG00000277268	2.03288	-0.305477	0.113258	0.000378993	0.00334407	LHX1-DT	antisense
ENSG00000259433	11.9266	0.2414	0.0874511	0.000380027	0.00335163	AC051619.3	processed_pseudogene
ENSG00000278864	156.849	-0.150004	0.0493211	0.00038186	0.0033639	AC055811.4	TEC
ENSG00000273226	18.9147	0.135266	0.0437859	0.000383325	0.00337268	AL391834.2	antisense
ENSG00000271780	98.1156	-0.109492	0.0340477	0.000384377	0.00337982	AL118558.3	lincRNA
ENSG00000248355	6.7889	0.322619	0.123445	0.000384832	0.00338303	ARL2BPP6	processed_pseudogene
ENSG00000236520	2.97555	-0.284695	0.105304	0.000387662	0.00340477	GPC6-AS1	antisense
ENSG00000245648	9.36593	0.199095	0.069696	0.000389313	0.00341848	AC022075.1	antisense
ENSG00000249483	1.77828	0.323442	0.122929	0.000391113	0.00343191	AC026726.1	lincRNA
ENSG00000238125	1.49151	-0.355259	0.132821	0.00039381	0.00345239	SLC9A3P2	processed_pseudogene
ENSG00000273096	17.6428	0.184672	0.0640021	0.00039512	0.00346069	AL021707.8	sense_intronic
ENSG00000259448	75.95	-0.100587	0.030916	0.000398021	0.00347889	LINC02352	lincRNA
ENSG00000229543	3.14134	0.254859	0.0939701	0.000401272	0.00350167	AC010163.1	lincRNA
ENSG00000226102	6.90204	0.232318	0.0844496	0.000401898	0.00350473	SEPT7P3	unprocessed_pseudogene
ENSG00000250602	39.8471	0.168371	0.0572995	0.000402309	0.00350671	AC093535.1	antisense
ENSG00000202373	0.915959	-0.371025	0.139115	0.000403009	0.00351201	SNORD115-43	snoRNA
ENSG00000233005	2.04259	-0.454623	0.176438	0.000404177	0.00351896	AC018742.1	lincRNA
ENSG00000206932	2.33644	0.274664	0.101548	0.000405754	0.00353107	RNU6-4P	snRNA
ENSG00000250137	6.19889	-0.212538	0.0752656	0.000407241	0.00353997	AC093607.1	antisense
ENSG00000260455	3.8079	-0.231339	0.081771	0.000407102	0.00353997	NBAT1	lincRNA
ENSG00000258384	25.0789	0.166812	0.0566857	0.000407902	0.00354409	AC068831.1	antisense
ENSG00000239899	5.13778	-0.231154	0.0828919	0.000409986	0.00356139	RN7SL674P	misc_RNA
ENSG00000258844	28.9262	0.175995	0.060263	0.000411421	0.00357141	AL162511.1	lincRNA
ENSG00000260633	7.28718	0.211932	0.0749557	0.000412754	0.00358134	AC010207.1	lincRNA
ENSG00000261120	3.06377	-0.218857	0.0773581	0.000415191	0.0035992	AL133299.1	antisense
ENSG00000259976	699.443	0.159186	0.0524081	0.000415487	0.00360013	AC093010.3	3prime_overlapping_ncRNA
ENSG00000251293	8.41754	-0.208756	0.0736314	0.000417585	0.00361255	AC008574.1	lincRNA
ENSG00000279443	19.2074	0.209233	0.0749994	0.00042155	0.0036417	AL513497.1	TEC
ENSG00000237212	22.6175	-0.20917	0.0742577	0.000421898	0.0036431	AL449403.1	lincRNA
ENSG00000271040	5.40085	-0.225466	0.079586	0.00042271	0.00364446	AL390955.2	lincRNA
ENSG00000279996	17.4302	0.281027	0.106388	0.000422614	0.00364446	AC004491.1	TEC
ENSG00000271181	3.72176	-0.246339	0.0893564	0.000425058	0.00366127	Z99916.2	processed_pseudogene
ENSG00000271869	77.0192	0.147694	0.0491628	0.00042502	0.00366127	AC026979.2	lincRNA
ENSG00000274029	62.8378	0.145887	0.048418	0.00042514	0.00366127	AC069209.1	lincRNA
ENSG00000265366	7.55284	-0.183686	0.0629244	0.000427025	0.00367334	GLUD1P2	transcribed_unprocessed_pseudogene
ENSG00000224281	75.2918	0.0883763	0.0268688	0.000427638	0.00367779	SLC25A5-AS1	processed_transcript
ENSG00000205918	56.4414	-0.182051	0.0628633	0.000429018	0.00368632	PDPK2P	transcribed_unprocessed_pseudogene
ENSG00000234336	131.028	-0.133615	0.0434115	0.000429957	0.00369272	JAZF1-AS1	antisense
ENSG00000233936	7.02975	-0.256141	0.0925741	0.000432598	0.00371205	AL390778.2	lincRNA
ENSG00000266907	15.4805	-0.13973	0.0459657	0.000433194	0.00371585	AC006116.1	processed_pseudogene
ENSG00000272501	189.157	-0.117905	0.0378369	0.000433236	0.00371585	AL662844.4	antisense
ENSG00000264617	8.19123	-0.258863	0.0939334	0.000434886	0.00372664	AC233702.4	unprocessed_pseudogene
ENSG00000234646	10.7593	-0.185191	0.0641747	0.000439286	0.00375167	AL049651.2	sense_overlapping
ENSG00000271265	25.0666	-0.151577	0.0507544	0.000446089	0.00380039	AL355297.3	lincRNA
ENSG00000238217	20.1825	-0.153416	0.0510977	0.000446381	0.00380118	LINC01877	lincRNA
ENSG00000207816	20.0437	-0.18048	0.062168	0.000448511	0.0038153	MIR124-2	miRNA
ENSG00000239830	6.81892	0.195423	0.0691094	0.000448345	0.0038153	RPS4XP22	processed_pseudogene
ENSG00000261572	21.6527	-0.156539	0.0525107	0.000448676	0.0038156	AC097639.1	sense_intronic
ENSG00000231826	28.8774	0.203355	0.0729158	0.000450787	0.0038327	LINC01819	lincRNA
ENSG00000250415	3.21915	-0.217827	0.077881	0.000451496	0.00383787	AC022113.2	lincRNA
ENSG00000249584	6.56381	-0.258996	0.0971624	0.000457025	0.0038788	LINC02225	lincRNA
ENSG00000271797	1.81407	-0.277558	0.103628	0.000463634	0.00392178	AC008494.3	antisense
ENSG00000234630	30.1967	-0.201147	0.0713567	0.000467139	0.00394703	AC245060.2	lincRNA
ENSG00000265451	1.88189	0.279808	0.106312	0.000467789	0.00395011	AC012447.1	antisense
ENSG00000279325	0.714667	-0.489595	0.180701	0.000468107	0.00395171	AL136359.1	lincRNA
ENSG00000229957	2.04763	-0.338168	0.12861	0.000469661	0.00396219	AL031687.1	lincRNA
ENSG00000254571	2.58559	0.383967	0.156409	0.000477544	0.00401439	AL358937.1	antisense
ENSG00000261604	62.724	-0.162679	0.0554259	0.000479392	0.00402431	AC114947.2	antisense
ENSG00000272717	3.04919	-0.211974	0.0762356	0.000480291	0.00403042	AC112236.2	antisense
ENSG00000259076	1.32256	0.36079	0.144267	0.000482132	0.00404141	AL049869.2	antisense
ENSG00000223959	719.323	0.0681536	0.0204113	0.000489399	0.00408972	AFG3L1P	transcribed_unitary_pseudogene
ENSG00000243742	50.6054	-0.207718	0.075362	0.000490202	0.00409283	RPLP0P2	transcribed_processed_pseudogene
ENSG00000259668	16.1662	0.189359	0.0670942	0.000491807	0.00410443	AC066613.1	antisense
ENSG00000237943	120.624	0.110347	0.0351808	0.000495714	0.00412889	PRKCQ-AS1	processed_transcript
ENSG00000260157	8.47971	-0.223991	0.0816408	0.000497196	0.00413935	AC233702.1	transcribed_unprocessed_pseudogene
ENSG00000235337	4.46097	-0.247804	0.0931176	0.00049995	0.00415962	AC093083.1	lincRNA
ENSG00000179082	22.0656	-0.244363	0.0911965	0.000501454	0.00417031	C9orf106	lincRNA
ENSG00000237451	4.81815	-0.224058	0.0813672	0.000505808	0.00420213	CDK2AP2P2	processed_pseudogene
ENSG00000279526	13.5186	0.185472	0.0660294	0.000505832	0.00420213	AC011239.2	TEC
ENSG00000254606	0.578938	0.506585	0.198092	0.000505956	0.00420224	AC013714.1	lincRNA
ENSG00000279571	8.40716	-0.248758	0.0918966	0.000512572	0.00424792	AL162426.1	lincRNA
ENSG00000267577	20.3619	-0.172965	0.0600914	0.000514136	0.0042581	AC010327.3	antisense
ENSG00000269553	52.2465	0.0582485	0.0614327	0.000514825	0.00426253	U62631.1	sense_intronic
ENSG00000211451	94.3378	-0.101951	0.0316505	0.00051527	0.0042647	GNRHR2	transcribed_unitary_pseudogene
ENSG00000224939	8.9319	-0.184374	0.0648948	0.000516655	0.00427152	LINC00184	lincRNA
ENSG00000250538	3.34079	-0.322141	0.124381	0.000518934	0.00428403	AC104407.1	antisense
ENSG00000264384	7.51893	-0.197738	0.0709504	0.000521308	0.00429972	RN7SL431P	misc_RNA
ENSG00000267422	9.6571	0.187734	0.0678399	0.000522521	0.00430879	AC016582.2	transcribed_processed_pseudogene
ENSG00000272121	33.745	-0.13119	0.0429996	0.00052281	0.00430938	AC006058.3	lincRNA
ENSG00000253520	10.1622	0.198261	0.0718888	0.000525365	0.00432564	AC136628.3	processed_pseudogene
ENSG00000274400	29.6119	-0.148177	0.0499646	0.000525473	0.00432564	AC015967.1	lincRNA
ENSG00000224596	26.7303	-0.118541	0.0384943	0.000530896	0.00436367	ZMIZ1-AS1	antisense
ENSG00000248240	6.25327	0.201612	0.0733445	0.000531022	0.00436368	AC114956.1	antisense
ENSG00000260412	204.168	-0.111676	0.0360144	0.000531791	0.00436637	AL353746.1	sense_overlapping
ENSG00000279839	14.6844	0.268527	0.105118	0.000531617	0.00436637	AL512383.1	TEC
ENSG00000204789	709.642	-0.150762	0.0508724	0.000532579	0.00437183	ZNF204P	processed_pseudogene
ENSG00000270504	53.7693	0.183211	0.065452	0.000534177	0.00438212	AL391422.4	antisense
ENSG00000241765	10.2167	0.245166	0.0950022	0.000536647	0.00439669	RPS26P45	processed_pseudogene
ENSG00000258919	15.6452	-0.158103	0.0542226	0.000539655	0.00441468	AL049836.1	lincRNA
ENSG00000269124	87.5968	0.277767	0.110044	0.000541287	0.00442613	AC007193.2	antisense
ENSG00000227416	1.61137	-0.298498	0.115313	0.000542341	0.00443062	AL929472.1	processed_pseudogene
ENSG00000263990	32.5346	-0.147649	0.0501366	0.000543196	0.00443439	AC004253.1	lincRNA
ENSG00000270015	177.804	0.0876199	0.0271551	0.000543229	0.00443439	AC087481.3	sense_intronic
ENSG00000282855	3.08754	-0.265443	0.100764	0.000544161	0.00444105	AC093591.3	processed_pseudogene
ENSG00000164616	4.79696	-0.238703	0.0880817	0.000546056	0.00444894	FBXL21P	transcribed_unitary_pseudogene
ENSG00000273759	24.2203	0.137579	0.0465932	0.000550377	0.00447737	AL117379.1	lincRNA
ENSG00000268157	1.39289	0.3392	0.135829	0.000550743	0.00447844	AC010524.1	antisense
ENSG00000273243	13.1462	-0.171979	0.060195	0.000551377	0.00448263	Z82243.1	lincRNA
ENSG00000272311	0.894021	-0.410134	0.160395	0.000554916	0.00450755	IFNL4P1	unprocessed_pseudogene
ENSG00000206685	3.92884	-0.278028	0.107499	0.000555356	0.00451016	RNU6-1189P	snRNA
ENSG00000238250	2.31749	-0.254915	0.0964039	0.000557147	0.00452182	ST6GAL2-IT1	sense_intronic
ENSG00000267751	4.79541	0.233968	0.0889106	0.000557098	0.00452182	AC009005.1	antisense
ENSG00000204603	4.62421	-0.351313	0.138677	0.000557717	0.00452548	LINC01257	lincRNA
ENSG00000254432	15.5455	0.262191	0.101939	0.000557841	0.00452552	AC113143.1	antisense
ENSG00000279464	15.5794	0.139741	0.048163	0.000575047	0.00464431	AC096720.2	TEC
ENSG00000267355	44.4647	0.132605	0.044723	0.00057695	0.0046577	RPL9P29	processed_pseudogene
ENSG00000274698	40.2421	-0.0996101	0.0317453	0.000582754	0.00469659	AC099521.1	lincRNA
ENSG00000272563	9.9635	0.330554	0.136221	0.000583972	0.00470342	AC016745.2	lincRNA
ENSG00000279954	11.0955	-0.170448	0.0600369	0.000589104	0.00473673	BX324167.2	antisense
ENSG00000273142	119.63	0.133144	0.0445214	0.000592672	0.00476341	LINC02604	lincRNA
ENSG00000229981	3.80135	-0.238315	0.0917516	0.000593744	0.00476799	LINC01435	lincRNA
ENSG00000261241	2.07546	0.311376	0.124867	0.000593552	0.00476799	LINC02128	lincRNA
ENSG00000241180	0.70811	0.462295	0.210519	0.000596385	0.00478426	AL645608.4	lincRNA
ENSG00000239873	3.73802	-0.245665	0.0928213	0.000596784	0.00478635	GAPDHP27	processed_pseudogene
ENSG00000257703	4.819	0.232536	0.0878318	0.000601068	0.00481259	AC068643.1	lincRNA
ENSG00000228216	3.98943	0.219972	0.0818776	0.000603571	0.00482755	AL355607.1	lincRNA
ENSG00000251600	12.2216	-0.171866	0.0605436	0.000606432	0.00484738	AC107223.1	processed_transcript
ENSG00000256022	0.97458	-0.367971	0.146916	0.000607101	0.00485069	LINC02411	lincRNA
ENSG00000223624	4.47566	-0.258685	0.0987844	0.000610329	0.00487137	AL033528.1	processed_pseudogene
ENSG00000231359	18.8881	-0.147767	0.0509134	0.000614008	0.00489868	AC072052.1	processed_pseudogene
ENSG00000267015	0.911272	-0.374381	0.151419	0.000615373	0.00490648	AC023090.1	antisense
ENSG00000261070	2.17471	-0.265036	0.102465	0.000617981	0.00492418	AP003071.2	lincRNA
ENSG00000232917	0.629006	0.483069	0.202854	0.000618359	0.00492513	HSPE1P6	processed_pseudogene
ENSG00000236377	3.74747	-0.218914	0.0813789	0.000620552	0.00493762	AC084809.2	lincRNA
ENSG00000255457	0.973154	0.441015	0.188028	0.000622226	0.00494563	AC022880.2	processed_pseudogene
ENSG00000256287	2.3124	-0.293545	0.115132	0.000622232	0.00494563	LINC02398	lincRNA
ENSG00000276505	20.3828	0.151573	0.0539166	0.000622732	0.00494856	AP000892.2	sense_intronic
ENSG00000279932	2.14928	0.323431	0.134914	0.000629427	0.00498941	AP006248.4	sense_intronic
ENSG00000280229	5.92439	-0.187452	0.0677907	0.000629809	0.00499126	AL161658.1	TEC
ENSG00000235024	10.3885	-0.15702	0.0546063	0.000630306	0.00499312	AC097468.2	antisense
ENSG00000200630	3.54699	0.328212	0.138356	0.000633774	0.00501537	RF00019	misc_RNA
ENSG00000253596	8.9292	-0.171679	0.0607606	0.000634088	0.00501681	AC103952.1	antisense
ENSG00000224513	4.97315	-0.221035	0.0829764	0.000635873	0.00502745	AC109309.1	antisense
ENSG00000243024	32.0496	0.124916	0.0418647	0.000635961	0.00502745	AC012158.1	transcribed_processed_pseudogene
ENSG00000131885	184.616	-0.179093	0.0640754	0.000636192	0.00502823	KRT17P1	transcribed_unprocessed_pseudogene
ENSG00000251136	66.2889	0.0899788	0.0285585	0.000641762	0.00506805	AF117829.1	lincRNA
ENSG00000276520	13.5373	-0.149458	0.0519643	0.000642173	0.00507024	CR589904.1	processed_pseudogene
ENSG00000250934	45.2985	-0.110643	0.0361819	0.000642547	0.00507167	AC016924.1	lincRNA
ENSG00000251365	2.05582	-0.312339	0.122874	0.000647715	0.00510332	LINC02236	lincRNA
ENSG00000269893	527.631	-0.0971114	0.0304044	0.000647686	0.00510332	SNHG8	lincRNA
ENSG00000268496	214.932	0.138679	0.0467457	0.000648558	0.00510793	AC245884.9	sense_intronic
ENSG00000273011	7.4488	-0.17358	0.0621548	0.000651111	0.00512591	AC092681.3	lincRNA
ENSG00000279724	11.8629	0.322614	0.135004	0.000652102	0.00513266	AC005086.2	pseudogene
ENSG00000253981	3.63625	-0.250401	0.0959259	0.000653126	0.00513753	ALG1L13P	transcribed_unprocessed_pseudogene
ENSG00000274723	2.24907	0.278412	0.111619	0.000654927	0.00514934	AC079906.1	lincRNA
ENSG00000250431	3.62229	-0.250411	0.0968	0.000655433	0.00515142	AC105914.2	antisense
ENSG00000259905	20.9641	-0.197576	0.072873	0.000655688	0.00515236	PWRN1	lincRNA
ENSG00000267506	55.9074	-0.185477	0.0674336	0.000656669	0.00515794	AC021683.2	lincRNA
ENSG00000269952	16.2414	0.191331	0.0712843	0.000657569	0.00516271	AL117336.1	sense_intronic
ENSG00000258240	31.462	-0.19721	0.0730913	0.000661494	0.00518834	AC002351.1	lincRNA
ENSG00000254510	17.5408	-0.280365	0.110683	0.00066234	0.00519391	AP001107.5	processed_transcript
ENSG00000275695	4.15543	-0.218323	0.082429	0.000663272	0.00520014	UBE2Q2P6	transcribed_unprocessed_pseudogene
ENSG00000237906	7.51822	-0.186424	0.0674244	0.000663955	0.00520335	MUPP	transcribed_unprocessed_pseudogene
ENSG00000278133	303.041	0.0206904	0.0361887	0.000663879	0.00520335	AC135050.6	sense_intronic
ENSG00000230104	2.25402	-0.271788	0.105449	0.000665385	0.00521348	AC018712.1	processed_pseudogene
ENSG00000249684	46.677	-0.145849	0.0505214	0.000666471	0.00521877	AC106795.2	antisense
ENSG00000277453	1.77347	0.276844	0.110207	0.000672067	0.00525071	AC010271.2	lincRNA
ENSG00000220575	140.123	-0.181994	0.0663488	0.000674739	0.00526695	HTR5A-AS1	antisense
ENSG00000254921	9.27298	-0.213061	0.079992	0.000676481	0.00527544	AC116456.1	antisense
ENSG00000277883	4.76385	-0.214729	0.0800925	0.000676854	0.00527727	NLRP3P1	unprocessed_pseudogene
ENSG00000268262	5.43106	-0.248876	0.0959574	0.000680643	0.00529813	AC011445.1	sense_overlapping
ENSG00000246366	16.1589	0.167	0.060801	0.000680902	0.00529906	LACTB2-AS1	antisense
ENSG00000272491	11.0709	0.201726	0.0760227	0.000681621	0.00530357	AL109659.2	antisense
ENSG00000207341	0.527194	0.539554	0.223101	0.000682048	0.00530472	RNA5SP64	rRNA_pseudogene
ENSG00000262050	15.1093	0.159938	0.0575922	0.000682538	0.00530614	AC005696.1	antisense
ENSG00000260572	26.4896	-0.100366	0.0324624	0.000690442	0.00535906	AC069224.1	antisense
ENSG00000276550	5140.43	0.166737	0.0600151	0.00069272	0.00537565	HERC2P2	transcribed_unprocessed_pseudogene
ENSG00000242474	7.77828	0.177809	0.0648932	0.000693198	0.00537606	AC093627.5	lincRNA
ENSG00000248476	12.9703	0.218084	0.0844361	0.000693106	0.00537606	BACH1-IT1	sense_intronic
ENSG00000236700	12.1643	0.202986	0.0767209	0.000694257	0.00538208	LINC01010	lincRNA
ENSG00000228824	39.1827	-0.13467	0.0461853	0.000702169	0.00543235	MIR4500HG	lincRNA
ENSG00000224057	2.02027	0.269599	0.1084	0.000716684	0.0055222	EGFR-AS1	antisense
ENSG00000232780	18.9061	-0.163489	0.0584996	0.000721841	0.00554957	GAPDHP74	transcribed_processed_pseudogene
ENSG00000236859	188.613	0.131352	0.0453163	0.000722186	0.0055511	NIFK-AS1	antisense
ENSG00000259530	1.19237	0.371686	0.159377	0.000725093	0.00557007	AC104574.1	lincRNA
ENSG00000223724	11.0115	0.289576	0.120899	0.000726374	0.00557879	RAD17P2	processed_pseudogene
ENSG00000260650	0.703281	-0.410163	0.164084	0.000728852	0.00559443	AC010542.1	antisense
ENSG00000203706	46.782	0.126517	0.0425515	0.000729521	0.00559844	SERTAD4-AS1	antisense
ENSG00000276071	35.9934	-0.119994	0.0405721	0.000731152	0.00560887	AC074138.1	lincRNA
ENSG00000199201	3.6625	0.286254	0.119686	0.000731381	0.00560931	RF00019	misc_RNA
ENSG00000256006	9.12305	0.0245859	0.0575793	0.000731724	0.00561082	AC084117.1	sense_intronic
ENSG00000273487	190.228	0.104459	0.0343467	0.000733921	0.00562653	AC104836.1	lincRNA
ENSG00000247950	34.5314	-0.104828	0.0346893	0.00073504	0.00563284	SEC24B-AS1	antisense
ENSG00000269927	4.05819	0.293754	0.122506	0.000746644	0.00569996	AC004817.3	lincRNA
ENSG00000233896	1.36988	0.304728	0.125629	0.000750311	0.00572221	PDYN-AS1	antisense
ENSG00000198416	13.8726	-0.172184	0.0621373	0.000750525	0.00572269	ZNF658B	transcribed_unprocessed_pseudogene
ENSG00000278730	311.759	0.0971268	0.031292	0.000756286	0.00576086	AC005332.6	lincRNA
ENSG00000230306	3.01978	-0.221998	0.0857118	0.000757077	0.00576457	BANF1P2	processed_pseudogene
ENSG00000128254	17.2887	-0.178718	0.0656282	0.000758034	0.00576986	C22orf24	processed_transcript
ENSG00000227338	5.54906	-0.178099	0.0657698	0.000759672	0.00577855	AL139280.1	lincRNA
ENSG00000251141	87.8096	-0.101485	0.0331644	0.000760507	0.00578222	MRPS30-DT	antisense
ENSG00000257951	2.2641	-0.306356	0.122539	0.000763731	0.00579899	AC126177.5	unprocessed_pseudogene
ENSG00000268460	100.911	-0.0981089	0.03211	0.000763706	0.00579899	AC006262.1	processed_transcript
ENSG00000224715	4.29914	-0.264808	0.104579	0.000766372	0.00581325	Z82186.1	lincRNA
ENSG00000255710	5.67069	-0.226728	0.0878677	0.000768824	0.00583069	AP003170.1	processed_pseudogene
ENSG00000278642	3.69375	0.253489	0.104058	0.000772287	0.00585228	AC015813.4	lincRNA
ENSG00000260664	177.387	0.113327	0.0379456	0.000773958	0.00586261	AC004158.1	lincRNA
ENSG00000235189	5.48658	0.207208	0.0792511	0.000774916	0.00586753	AL034405.1	antisense
ENSG00000258806	2.14638	-0.304873	0.12451	0.000775881	0.00587367	OR11H7	polymorphic_pseudogene
ENSG00000234614	31.7757	-0.176443	0.0646097	0.000777075	0.00588154	C2CD4D-AS1	antisense
ENSG00000279202	22.5292	0.263369	0.107488	0.000780058	0.00589942	AC130448.1	TEC
ENSG00000185168	17.8492	0.197289	0.0757565	0.000784267	0.00592889	LINC00482	lincRNA
ENSG00000254226	6.95226	0.176137	0.0654763	0.000790653	0.00596532	LINC01933	lincRNA
ENSG00000264589	93.0878	-0.101155	0.0332658	0.00079158	0.00596995	MAPT-AS1	antisense
ENSG00000228079	2.05607	0.280976	0.117655	0.000793182	0.00597688	AC012368.2	lincRNA
ENSG00000277708	3.17249	-0.292461	0.122456	0.000795934	0.00599206	PGBD4P2	unprocessed_pseudogene
ENSG00000254547	11.1961	-0.269616	0.108808	0.000796618	0.00599369	AC036111.1	unprocessed_pseudogene
ENSG00000228312	4.04103	0.333028	0.145307	0.000798837	0.00600682	GAPDHP45	processed_pseudogene
ENSG00000249846	14.185	-0.172775	0.0633743	0.000800829	0.00602062	LINC02021	lincRNA
ENSG00000234537	21.5722	0.169555	0.0616497	0.000804216	0.0060413	AL354751.1	unprocessed_pseudogene
ENSG00000280350	13.0858	0.195676	0.075364	0.000804071	0.0060413	LINC01726	lincRNA
ENSG00000200914	0.673985	-0.436996	0.179156	0.000804648	0.00604336	RNA5SP435	rRNA_pseudogene
ENSG00000240194	2.6543	-0.238937	0.093595	0.000809014	0.00606896	CYMP	transcribed_unitary_pseudogene
ENSG00000264791	4.89938	-0.189071	0.071056	0.000808951	0.00606896	AC004147.3	antisense
ENSG00000250303	115.498	0.0890188	0.0287678	0.000812477	0.00609352	AP002884.1	lincRNA
ENSG00000279685	38.983	-0.130983	0.0452807	0.000813234	0.00609581	MAPT-IT1	sense_intronic
ENSG00000223128	2.0572	0.37572	0.163649	0.000819899	0.00613851	RN7SKP140	misc_RNA
ENSG00000234575	2.00698	-0.312649	0.129588	0.000822367	0.00615336	CTSLP8	unprocessed_pseudogene
ENSG00000212978	160.107	0.0362669	0.0369968	0.000825785	0.00617651	AC016747.1	processed_transcript
ENSG00000204054	1193.19	0.132986	0.0461523	0.000829744	0.00619638	LINC00963	processed_transcript
ENSG00000257674	3.46412	-0.270437	0.109737	0.000834808	0.00623175	AC020629.1	processed_pseudogene
ENSG00000281162	3.61048	0.312867	0.134046	0.000836535	0.00624097	LINC01127	lincRNA
ENSG00000279833	66.9628	0.115764	0.0392191	0.000842564	0.00627488	AL031846.2	antisense
ENSG00000200783	4.86411	0.230923	0.0934156	0.000846619	0.00630015	RN7SKP180	misc_RNA
ENSG00000250948	9.78979	0.243099	0.0984337	0.000848525	0.00631309	AC091180.4	antisense
ENSG00000261465	1.95393	0.252898	0.103828	0.000851123	0.00632748	AC099518.4	antisense
ENSG00000257763	5.81399	-0.186321	0.0702635	0.000856971	0.00636722	OR5BK1P	unprocessed_pseudogene
ENSG00000255538	3.64	-0.212734	0.0830883	0.000857282	0.00636828	OR10V2P	unprocessed_pseudogene
ENSG00000175302	1.87123	-0.280091	0.115971	0.000864532	0.00641588	ANKRD30BP1	unprocessed_pseudogene
ENSG00000261409	15.1974	0.173289	0.0633991	0.000867899	0.0064371	AL035425.3	sense_overlapping
ENSG00000213673	1.58754	0.346868	0.152088	0.000871458	0.00645594	SLC25A5P3	processed_pseudogene
ENSG00000271270	106.378	-0.0785641	0.0254654	0.000878745	0.0065036	TMCC1-AS1	antisense
ENSG00000254533	5.40003	0.177656	0.0672883	0.000880789	0.00651516	AF186192.1	lincRNA
ENSG00000279248	0.575536	-0.495589	0.201772	0.000880992	0.00651516	AP003400.4	TEC
ENSG00000226074	1.08762	0.375454	0.165854	0.000881385	0.0065168	PRSS44	transcribed_unprocessed_pseudogene
ENSG00000253203	6.49404	0.270288	0.113478	0.000883087	0.00652685	GUSBP3	transcribed_unprocessed_pseudogene
ENSG00000248530	0.846143	-0.369528	0.155262	0.000883439	0.00652819	BCL2L12P1	processed_pseudogene
ENSG00000257035	0.850896	-0.386466	0.164336	0.000885163	0.00653235	AC025252.2	unprocessed_pseudogene
ENSG00000227942	1.06826	0.381257	0.173428	0.00088816	0.00654829	FRMD8P1	processed_pseudogene
ENSG00000232386	8.01202	0.178339	0.0673795	0.000888333	0.00654829	AC015712.1	lincRNA
ENSG00000228620	0.676731	-0.418792	0.171608	0.000889415	0.00655453	Z97056.1	antisense
ENSG00000248954	7.67077	-0.242703	0.0982098	0.000890305	0.00655981	AC027801.1	lincRNA
ENSG00000250896	6.27307	-0.161622	0.0589606	0.000892401	0.00657144	RNPS1P1	processed_pseudogene
ENSG00000218713	1.13733	0.397061	0.184494	0.000894492	0.00658557	AL512378.1	processed_pseudogene
ENSG00000282936	181.44	-0.130392	0.0457291	0.000895583	0.00659233	AC004706.3	TEC
ENSG00000214857	0.766856	0.56326	0.243006	0.000900048	0.00662391	SEM1P1	processed_pseudogene
ENSG00000175772	320.973	-0.112056	0.0365129	0.000902081	0.0066363	LINC01106	lincRNA
ENSG00000214147	0.569228	-0.485982	0.197111	0.000905894	0.00666049	AC092952.1	processed_pseudogene
ENSG00000269652	2.7307	0.248362	0.102532	0.000906611	0.00666319	AC011510.1	antisense
ENSG00000263884	8.00158	-0.148571	0.0539042	0.000907386	0.00666669	AP000845.1	lincRNA
ENSG00000275880	9.91334	-0.1624	0.0599368	0.000911626	0.00669616	AL139385.1	antisense
ENSG00000237863	10.212	0.197507	0.0762522	0.000913988	0.00670874	AL035425.1	antisense
ENSG00000230498	8.87738	-0.202996	0.0780501	0.000915893	0.00671594	AL035409.1	antisense
ENSG00000261468	4.16707	0.232356	0.093802	0.000915818	0.00671594	AC096921.2	sense_overlapping
ENSG00000280913	35.9548	-0.135532	0.0481817	0.000920123	0.00673647	CTSLP3	transcribed_unprocessed_pseudogene
ENSG00000258517	27.1966	-0.148757	0.054042	0.00092422	0.00675452	AC004817.1	lincRNA
ENSG00000251389	2.69542	-0.24543	0.100609	0.000930112	0.00679392	YTHDF1P1	processed_pseudogene
ENSG00000263618	2.68591	-0.264485	0.108283	0.0009352	0.00682585	AP005121.1	lincRNA
ENSG00000229901	7.12442	0.257397	0.109652	0.00093885	0.00684724	AC093151.2	antisense
ENSG00000273017	8.05164	0.209272	0.0839445	0.000941146	0.00685964	AP000240.1	sense_intronic
ENSG00000223942	0.794592	-0.453669	0.189829	0.000941475	0.00685981	AL590302.1	sense_intronic
ENSG00000273107	14.3819	0.15277	0.0562931	0.000942627	0.00686689	AL512598.1	lincRNA
ENSG00000255547	3.39521	-0.278966	0.114919	0.000943865	0.00687459	RPA2P3	processed_pseudogene
ENSG00000216819	3.38703	-0.20587	0.0801841	0.000946585	0.0068865	TUBB2BP1	unprocessed_pseudogene
ENSG00000274021	1.111	-0.348501	0.147196	0.000947835	0.00689163	AC024909.1	antisense
ENSG00000260145	2.20835	0.27847	0.118925	0.000948308	0.00689333	AC023825.2	antisense
ENSG00000224418	4.0364	-0.204121	0.0800596	0.000951899	0.00691105	STK24-AS1	antisense
ENSG00000211643	1.61905	-0.32364	0.13567	0.000953726	0.00691931	IGLV5-52	IG_V_gene
ENSG00000237571	0.783071	0.382607	0.172803	0.000959374	0.00695427	AC073284.1	lincRNA
ENSG00000253161	13.5176	-0.18398	0.0699711	0.000960166	0.00695736	LINC01605	lincRNA
ENSG00000261549	1.72233	-0.312058	0.132349	0.000960461	0.00695818	AC107954.1	processed_pseudogene
ENSG00000271938	1.18504	0.307415	0.133191	0.000961981	0.00696521	AC103724.4	lincRNA
ENSG00000253535	7.3791	-0.18084	0.0689071	0.000966581	0.00698921	AC120193.1	antisense
ENSG00000271147	93.9174	-0.0848996	0.027614	0.000967734	0.00699621	ARMCX5-GPRASP2	processed_transcript
ENSG00000230069	3.0926	0.200821	0.0784317	0.000970266	0.0070092	LRRC37A15P	processed_pseudogene
ENSG00000215039	657.385	-0.061752	0.019449	0.000976525	0.00704908	CD27-AS1	processed_transcript
ENSG00000244256	11.8717	0.212427	0.0863774	0.000976528	0.00704908	RN7SL130P	misc_RNA
ENSG00000267589	2.3816	0.279182	0.122631	0.000978093	0.00705904	AC011444.4	processed_pseudogene
ENSG00000213225	12.3875	-0.220202	0.0887488	0.000985044	0.00709843	NOC2LP1	transcribed_processed_pseudogene
ENSG00000228692	9.20499	0.21342	0.0874219	0.000990654	0.00712941	AL445307.1	lincRNA
ENSG00000261965	0.595021	-0.480613	0.197664	0.000994049	0.00714979	ISCA1P3	processed_pseudogene
ENSG00000280222	125.059	0.219019	0.0887099	0.00100582	0.00722628	AL365209.1	TEC
ENSG00000259398	10.8944	0.28385	0.124465	0.0010102	0.0072509	AC090970.1	sense_intronic
ENSG00000258130	8.66752	-0.217267	0.0870173	0.00101134	0.0072563	AC106782.1	transcribed_unprocessed_pseudogene
ENSG00000231649	1.07507	-0.416779	0.185807	0.00101192	0.00725715	SPATA31B1P	unprocessed_pseudogene
ENSG00000254826	0.86033	-0.38122	0.167061	0.00101576	0.00727844	AP001922.3	sense_intronic
ENSG00000253154	2.19191	0.340787	0.152951	0.00101748	0.00728936	AC100801.1	processed_transcript
ENSG00000230701	39.9186	0.172996	0.0667158	0.0010188	0.00729608	FBXW4P1	processed_pseudogene
ENSG00000216613	2.38352	0.293421	0.129636	0.00101931	0.00729832	AL023284.2	processed_pseudogene
ENSG00000229456	11.5528	0.26587	0.114533	0.0010246	0.00733211	RLIMP1	processed_pseudogene
ENSG00000254973	27.9872	-0.142914	0.0520095	0.00102567	0.007337	AC105219.4	lincRNA
ENSG00000224728	8.97061	-0.157349	0.0585837	0.00102761	0.00734809	IMPDH1P8	processed_pseudogene
ENSG00000180422	32.9536	0.143674	0.0521672	0.00102999	0.00735962	LINC00304	lincRNA
ENSG00000269921	5.34273	-0.159657	0.0598276	0.00103737	0.00739982	AC068620.1	lincRNA
ENSG00000281186	19.7908	0.199097	0.0787339	0.00103844	0.00740472	LINC00706	lincRNA
ENSG00000237418	12.0755	-0.143938	0.0523832	0.0010388	0.00740588	AC069257.2	processed_pseudogene
ENSG00000242353	4.13755	-0.223558	0.0896511	0.00104185	0.00742346	RPL12P30	processed_pseudogene
ENSG00000279349	18.2726	-0.12725	0.0447802	0.00104206	0.00742356	AC092692.1	TEC
ENSG00000251032	2.37386	-0.303717	0.129717	0.00104549	0.00743967	CUL1P1	processed_pseudogene
ENSG00000264725	5.26429	0.401837	0.193022	0.0010479	0.00745399	MIR3129	miRNA
ENSG00000236255	103.545	0.108998	0.0375363	0.0010487	0.00745413	AC009404.1	lincRNA
ENSG00000261189	2.79267	0.238514	0.100049	0.00105243	0.00747642	AL031058.1	antisense
ENSG00000272817	0.846094	0.359899	0.160534	0.00105978	0.00752046	AL359198.1	antisense
ENSG00000273312	4.30891	-0.175929	0.0672712	0.00105981	0.00752046	AL121749.1	antisense
ENSG00000279700	89.739	0.195772	0.0785199	0.00106112	0.00752834	AC131212.2	TEC
ENSG00000255545	111.264	-0.157688	0.0587395	0.00106724	0.00756328	AP004608.1	processed_transcript
ENSG00000248397	1.59345	0.322363	0.143066	0.00106779	0.00756578	LINC00498	lincRNA
ENSG00000213279	2.99034	0.26214	0.113994	0.00107201	0.00759147	Z97192.2	lincRNA
ENSG00000272950	9.37948	0.191839	0.0757989	0.00107981	0.00763386	AC093799.1	antisense
ENSG00000233330	27.7861	0.261048	0.112127	0.00108044	0.00763694	AL078581.1	antisense
ENSG00000242615	14.5374	-0.138584	0.0504337	0.00108132	0.0076403	AC022415.1	transcribed_processed_pseudogene
ENSG00000238364	4.48454	0.175802	0.0681273	0.00108179	0.00764078	RNU7-140P	snRNA
ENSG00000261188	119.329	-0.0967851	0.0325557	0.00108368	0.00764988	Z95115.1	antisense
ENSG00000254610	5.99092	-0.192789	0.076071	0.00108422	0.00765089	AC004923.1	transcribed_unprocessed_pseudogene
ENSG00000235316	39.3108	-0.14283	0.052131	0.00108444	0.00765096	DUSP8P5	processed_pseudogene
ENSG00000267248	84.7695	-0.0892293	0.0296839	0.00109152	0.00769669	AC025048.2	processed_transcript
ENSG00000244300	53.5437	0.172341	0.0666551	0.00109246	0.00770043	GATA2-AS1	antisense
ENSG00000255202	5.17305	-0.190947	0.0748212	0.00109266	0.00770044	AL049629.1	antisense
ENSG00000267397	14.2193	0.156527	0.0589911	0.0010933	0.00770339	AC090229.1	lincRNA
ENSG00000244558	13.8168	-0.121054	0.0425655	0.00110696	0.00778969	KCNK15-AS1	antisense
ENSG00000258010	204.584	0.183051	0.0719119	0.00110724	0.00779017	AC016705.1	antisense
ENSG00000228175	22.0293	-0.103325	0.0352097	0.00111542	0.00784342	GEMIN8P4	processed_pseudogene
ENSG00000279853	13.1641	-0.134185	0.0483033	0.0011217	0.00788316	AC004453.2	TEC
ENSG00000228395	52.6458	0.137625	0.0497744	0.00112571	0.00790114	AL356481.1	antisense
ENSG00000241884	1.17265	0.365519	0.178121	0.00112756	0.00791123	AC114401.1	lincRNA
ENSG00000234405	4.35637	-0.193046	0.0755006	0.0011302	0.0079283	Z69733.1	antisense
ENSG00000277763	4.46348	0.184122	0.0726089	0.00113134	0.00793484	AL138995.1	lincRNA
ENSG00000223559	2.35645	-0.230893	0.0959397	0.00113347	0.00794533	AC073136.1	processed_pseudogene
ENSG00000266456	34.0018	-0.152613	0.056956	0.0011364	0.00796293	AP001178.3	antisense
ENSG00000204929	15.1065	-0.1442	0.0534127	0.00113737	0.00796585	AC007389.1	processed_transcript
ENSG00000225465	1796.19	-0.118534	0.041807	0.00113832	0.00797051	RFPL1S	antisense
ENSG00000256030	32.38	0.252281	0.108497	0.00114005	0.00798121	CBX3P4	transcribed_processed_pseudogene
ENSG00000265702	8.289	0.188166	0.0752316	0.00114384	0.00800182	AC005821.1	antisense
ENSG00000275427	69.7721	-0.177822	0.0687383	0.00114944	0.00802923	AF067845.2	lincRNA
ENSG00000230916	5.98556	0.248048	0.10692	0.00115332	0.00805188	MTCO1P53	processed_pseudogene
ENSG00000272321	240.69	-0.125083	0.0447759	0.00115509	0.00806125	AP003355.2	antisense
ENSG00000237090	0.590852	-0.485408	0.211379	0.00115575	0.00806295	AL512353.3	processed_pseudogene
ENSG00000268598	7.08276	0.185978	0.0744933	0.00115564	0.00806295	VN1R80P	unprocessed_pseudogene
ENSG00000257534	1.55828	0.299555	0.133838	0.0011564	0.00806482	AC023794.5	lincRNA
ENSG00000272416	19.8459	0.153353	0.0576458	0.0011576	0.00806995	AC025175.1	lincRNA
ENSG00000257384	6.18783	0.18355	0.073837	0.00115888	0.00807733	AC009779.1	processed_pseudogene
ENSG00000260971	3.07886	0.265098	0.113804	0.00116908	0.00813504	AC119674.1	lincRNA
ENSG00000272341	100.502	-0.149035	0.0556774	0.00117483	0.0081661	AL137003.2	lincRNA
ENSG00000271978	49.045	0.0958693	0.0321867	0.0011801	0.00819579	AL359643.2	lincRNA
ENSG00000275494	42.9772	0.141338	0.052092	0.00118018	0.00819579	AC133552.5	sense_intronic
ENSG00000233217	1.75945	-0.291312	0.129443	0.00118079	0.00819744	MROH3P	transcribed_unitary_pseudogene
ENSG00000273093	0.733757	0.44429	0.21342	0.00118085	0.00819744	AC097065.2	lincRNA
ENSG00000271734	4.1818	0.198159	0.0797839	0.00118241	0.00820679	Z98200.1	lincRNA
ENSG00000239569	95.8179	0.102365	0.0353089	0.00118348	0.00821273	KMT2E-AS1	antisense
ENSG00000242525	0.750894	-0.368619	0.165742	0.00118391	0.00821412	OR7E100P	unprocessed_pseudogene
ENSG00000206145	127.171	-0.138708	0.0507393	0.00118613	0.00822263	P2RX6P	transcribed_unprocessed_pseudogene
ENSG00000272338	52.7241	0.141708	0.0527835	0.00118862	0.00823486	AC067838.1	lincRNA
ENSG00000231334	2.17985	-0.247247	0.1052	0.00119728	0.00828131	AC104781.1	antisense
ENSG00000273015	338.551	0.0657863	0.0213174	0.00119753	0.00828155	AC008124.1	lincRNA
ENSG00000233930	92.005	-0.137007	0.0499548	0.00119792	0.00828271	KRTAP5-AS1	antisense
ENSG00000225511	9.13249	0.159657	0.0617611	0.00119826	0.00828358	LINC00475	transcribed_unprocessed_pseudogene
ENSG00000280274	41.4033	0.230878	0.0981746	0.0012016	0.00830511	AC009145.4	TEC
ENSG00000176510	1.12884	-0.360511	0.161079	0.00120287	0.0083124	OR10AC1	polymorphic_pseudogene
ENSG00000183171	12.3361	-0.155756	0.0590428	0.00120321	0.00831327	BX322650.1	processed_pseudogene
ENSG00000258045	40.9356	0.030575	0.0602129	0.00120719	0.00833601	RF00017	misc_RNA
ENSG00000254957	0.935308	-0.384714	0.178063	0.00120802	0.00833742	AC111188.2	processed_pseudogene
ENSG00000237934	2.80684	-0.20658	0.0842914	0.00120857	0.0083397	AL590729.1	antisense
ENSG00000229360	1.05156	-0.411942	0.18687	0.00121091	0.00835279	PPP1R2P5	processed_pseudogene
ENSG00000260918	1759.66	-0.0720386	0.0230792	0.0012149	0.0083758	AC107398.3	sense_overlapping
ENSG00000267339	4.35775	0.25434	0.1122	0.00123001	0.00845846	LINC00906	lincRNA
ENSG00000269376	8.76525	0.179687	0.0722179	0.00123193	0.00846907	AL356740.3	sense_intronic
ENSG00000216809	5.63429	0.19496	0.0799856	0.00123668	0.00849822	AL589993.1	processed_pseudogene
ENSG00000281974	11.243	0.227599	0.09742	0.00123736	0.00850132	AC025268.1	TEC
ENSG00000248309	73.9478	-0.0740742	0.0244117	0.0012392	0.00850938	MEF2C-AS1	antisense
ENSG00000274353	6.9217	-0.25001	0.107851	0.00123957	0.00851036	AC103564.3	unprocessed_pseudogene
ENSG00000251364	51.1988	0.129603	0.0479206	0.00124226	0.00852268	AC107884.1	antisense
ENSG00000232453	32.382	0.118331	0.042462	0.00125264	0.00858001	AC105277.1	lincRNA
ENSG00000210196	8460.24	0.226662	0.093706	0.00125561	0.00859724	MT-TP	Mt_tRNA
ENSG00000253988	15.024	0.208013	0.0862138	0.00126276	0.0086384	AC079015.1	lincRNA
ENSG00000242199	1.06299	-0.30998	0.138345	0.00126487	0.00864668	AC022336.1	processed_pseudogene
ENSG00000201098	1.91324	0.292521	0.132168	0.00126911	0.00866526	RNY1	misc_RNA
ENSG00000279578	2.82345	0.252744	0.111153	0.00126941	0.00866526	AC004899.2	TEC
ENSG00000250974	1.4703	-0.300803	0.133059	0.00127117	0.00867569	LINC02196	lincRNA
ENSG00000248890	43.9488	0.102185	0.0354477	0.00128846	0.00877164	HHIP-AS1	antisense
ENSG00000248996	4.0611	0.202774	0.082769	0.00129135	0.00878464	AC145098.1	antisense
ENSG00000259959	143.877	-0.0863147	0.0290278	0.00129175	0.00878464	AC107068.1	lincRNA
ENSG00000252965	13.441	0.165715	0.0654517	0.00129705	0.00881592	RF00019	misc_RNA
ENSG00000272505	236.731	-0.12877	0.0469917	0.00129911	0.00882841	AC104964.4	lincRNA
ENSG00000249119	103.618	0.183247	0.0743387	0.00130299	0.00885318	MTND6P4	processed_pseudogene
ENSG00000203876	105.212	0.129266	0.047089	0.00130662	0.00886994	ADD3-AS1	processed_transcript
ENSG00000279406	33.2441	0.18676	0.0767245	0.00131843	0.00894052	AL359183.1	TEC
ENSG00000282851	34.8601	0.149387	0.0574392	0.00131887	0.00894189	BISPR	lincRNA
ENSG00000230006	110.113	-0.104963	0.036712	0.0013199	0.00894727	ANKRD36BP2	transcribed_unprocessed_pseudogene
ENSG00000237181	9.42131	0.172059	0.0683731	0.00132284	0.0089606	AC147651.4	antisense
ENSG00000235497	2.29462	-0.232081	0.0984268	0.00132363	0.00896092	AC012506.4	lincRNA
ENSG00000211706	0.794656	-0.413346	0.190545	0.00132758	0.0089754	TRBV6-1	TR_V_gene
ENSG00000259518	2.26139	-0.239451	0.103479	0.00132967	0.00898464	LINC01583	lincRNA
ENSG00000275025	4.43274	0.178459	0.0716793	0.00132989	0.00898464	AC002401.3	antisense
ENSG00000250954	19.366	0.198176	0.0819794	0.00133104	0.0089892	AC016687.3	lincRNA
ENSG00000260640	6.3967	-0.174585	0.0689876	0.00133537	0.00901363	AP003115.1	lincRNA
ENSG00000256356	2.78145	-0.224789	0.095864	0.00133948	0.00903497	HSPA8P5	processed_pseudogene
ENSG00000281183	90.6871	-0.142433	0.0537035	0.00134109	0.00904424	NPTN-IT1	sense_intronic
ENSG00000238024	0.979013	0.329294	0.153828	0.00134239	0.00904976	DDX39BP2	unprocessed_pseudogene
ENSG00000233639	322.632	0.122265	0.0441386	0.00134493	0.00905867	PANTR1	processed_transcript
ENSG00000250723	6.83252	0.224981	0.0957303	0.00134554	0.00905975	AC016687.2	lincRNA
ENSG00000214076	52.2756	-0.160491	0.062137	0.00134953	0.00908019	CPSF1P1	transcribed_processed_pseudogene
ENSG00000214135	475.879	-0.0764401	0.0254271	0.0013529	0.00909485	AC132008.2	transcribed_unprocessed_pseudogene
ENSG00000273008	22.7501	-0.141063	0.0529369	0.0013605	0.00913301	AC010864.1	lincRNA
ENSG00000211459	440580	0.185321	0.075508	0.00136609	0.00916086	MT-RNR1	Mt_rRNA
ENSG00000254639	5.21266	-0.189749	0.0770583	0.00137003	0.00918243	AC116021.1	lincRNA
ENSG00000226155	9.11191	0.0606794	0.0687587	0.00138251	0.00925364	AC124944.1	antisense
ENSG00000273973	12.5056	0.149302	0.0579388	0.00138376	0.00925818	AC025162.2	sense_intronic
ENSG00000234056	44.8812	0.205413	0.0865761	0.00139234	0.00930736	LINC00463	lincRNA
ENSG00000271192	4.52484	-0.191517	0.0780839	0.00139308	0.00930908	AC006058.2	lincRNA
ENSG00000274798	1.15899	-0.317031	0.145866	0.00140052	0.00935054	AC025166.1	lincRNA
ENSG00000267421	13.3223	-0.109514	0.038888	0.00140453	0.00937239	AC005498.2	lincRNA
ENSG00000271122	152.875	-0.0691034	0.0228502	0.00140542	0.00937671	AC018647.2	antisense
ENSG00000264340	11.3903	0.269103	0.123299	0.0014075	0.00938509	AC009704.1	antisense
ENSG00000186076	13.7354	-0.162432	0.0631953	0.00141644	0.00943263	AC012085.1	processed_pseudogene
ENSG00000248008	182.468	-0.0698308	0.0230515	0.00141653	0.00943263	NRAV	antisense
ENSG00000238105	142.049	0.0930489	0.0326	0.00141694	0.00943372	GOLGA2P5	transcribed_unprocessed_pseudogene
ENSG00000267749	34.9985	0.215497	0.0927465	0.00142417	0.00947155	AC092068.3	sense_intronic
ENSG00000272181	2.78183	0.222164	0.0951672	0.0014258	0.00947944	AC012557.2	antisense
ENSG00000252147	20.4991	0.20801	0.0893958	0.0014276	0.00948976	RNY3P16	misc_RNA
ENSG00000256148	40.4572	0.175311	0.0714603	0.00143564	0.00953654	AP000763.2	processed_pseudogene
ENSG00000263011	28.8275	0.162533	0.06485	0.00144457	0.00958413	AC108134.4	sense_overlapping
ENSG00000223356	101.147	0.0520179	0.0504928	0.00144556	0.00958685	AL590666.1	antisense
ENSG00000238178	3.70369	-0.228207	0.0971973	0.00145169	0.00961798	AC078993.1	antisense
ENSG00000260804	943.76	-0.105329	0.0372441	0.00145448	0.00963478	LINC01963	lincRNA
ENSG00000225171	11.8401	0.169198	0.0677705	0.00145589	0.00964073	DUTP6	processed_pseudogene
ENSG00000205746	182.211	-0.199813	0.082156	0.00145818	0.00965086	AC126755.1	transcribed_unprocessed_pseudogene
ENSG00000258498	166.703	0.162811	0.0642172	0.00145958	0.00965509	DIO3OS	lincRNA
ENSG00000267924	1.19988	-0.291118	0.1343	0.00146088	0.00966032	AC139769.2	lincRNA
ENSG00000225733	2868.03	0.069046	0.0231566	0.00146227	0.00966618	FGD5-AS1	antisense
ENSG00000229743	38.46	0.128192	0.0479848	0.00147617	0.0097445	LINC01159	lincRNA
ENSG00000178722	43.2027	0.144184	0.0554496	0.00147821	0.00975288	C5orf64	processed_transcript
ENSG00000250863	5.0934	0.248836	0.111747	0.00147796	0.00975288	AC110799.1	lincRNA
ENSG00000258702	125.471	-0.127328	0.0471645	0.00147791	0.00975288	AL137786.1	processed_transcript
ENSG00000250899	45.4326	0.155864	0.0609971	0.00147854	0.00975338	AC125807.2	lincRNA
ENSG00000275963	43.8425	0.0935499	0.0325028	0.00148277	0.0097728	AC008115.4	lincRNA
ENSG00000124224	83.1144	0.100362	0.0352988	0.0014881	0.00980284	PPP4R1L	transcribed_unprocessed_pseudogene
ENSG00000272829	6.90052	-0.144435	0.0551799	0.00149909	0.00986159	AC002470.1	lincRNA
ENSG00000122548	12.3577	-0.203852	0.0858545	0.00150847	0.009913	KIAA0087	lincRNA
ENSG00000259404	9.49125	-0.134898	0.0507265	0.00150961	0.00991804	EFL1P1	transcribed_unprocessed_pseudogene
ENSG00000240668	1.45954	0.27682	0.128561	0.00151184	0.00992831	KRT8P36	processed_pseudogene
ENSG00000233508	177.592	-0.136723	0.0516725	0.00151647	0.00995011	AL021395.1	lincRNA
ENSG00000186676	1.04026	0.313526	0.150787	0.00151739	0.00995447	EEF1GP1	processed_pseudogene
ENSG00000182165	31.3583	0.0883794	0.0304918	0.00151875	0.00996164	TP53TG1	lincRNA
ENSG00000278702	2.85797	0.362314	0.188838	0.00152089	0.00997399	RF00017	misc_RNA
ENSG00000220305	20.6657	0.159698	0.0638234	0.00152764	0.010004	HNRNPH1P1	processed_pseudogene
ENSG00000231982	50.3237	-0.164054	0.0653755	0.00152783	0.010004	AC112907.2	unprocessed_pseudogene
ENSG00000232043	18.635	-0.137296	0.0519465	0.00152963	0.0100123	AL133230.1	antisense
ENSG00000225831	0.738934	-0.362312	0.16914	0.00153515	0.0100398	RPS18P1	processed_pseudogene
ENSG00000267272	36.7361	-0.153432	0.0595693	0.00153742	0.0100523	LINC01140	lincRNA
ENSG00000279193	0.488198	0.573103	0.251787	0.0015399	0.0100622	AC026336.4	TEC
ENSG00000276259	71.4092	0.115182	0.041805	0.00154435	0.0100861	AC009118.3	antisense
ENSG00000213468	12.7788	0.155977	0.0614274	0.00154465	0.0100863	FIRRE	processed_transcript
ENSG00000225472	60.5086	0.150155	0.0586947	0.00154605	0.0100938	AL136366.1	antisense
ENSG00000275329	20.0253	0.130344	0.0499904	0.00154738	0.0100972	AL138781.2	lincRNA
ENSG00000233273	4.47933	-0.226326	0.0978522	0.00155086	0.0101165	AMMECR1LP1	processed_pseudogene
ENSG00000250659	6.30507	0.257956	0.121699	0.00156253	0.0101769	AP001363.1	antisense
ENSG00000215196	176.882	-0.124766	0.0458891	0.00156413	0.0101856	BASP1-AS1	antisense
ENSG00000230447	5.47144	0.268871	0.127002	0.00157214	0.0102302	CTF2P	unitary_pseudogene
ENSG00000227495	7.62486	0.141412	0.0546552	0.00157702	0.010259	AC004771.1	antisense
ENSG00000260398	41.0715	0.121948	0.0453314	0.00158523	0.0103036	AC068700.1	sense_overlapping
ENSG00000279539	12.0711	-0.126281	0.047022	0.00158996	0.0103294	AC006486.2	TEC
ENSG00000279980	4.60155	-0.174937	0.0716513	0.00159126	0.0103322	AC018946.2	TEC
ENSG00000267280	51.6439	0.157514	0.062932	0.00159962	0.0103794	TBX2-AS1	antisense
ENSG00000260101	14.1707	-0.130156	0.0486319	0.00160303	0.010398	AC008074.2	lincRNA
ENSG00000260969	3.20245	0.263965	0.127031	0.00160419	0.0104037	WWOX-AS1	antisense
ENSG00000185847	1.25424	-0.290174	0.135444	0.00161135	0.0104412	LINC01405	lincRNA
ENSG00000188004	122.401	-0.075255	0.0255062	0.00161737	0.0104749	SNHG28	lincRNA
ENSG00000186019	4.72647	-0.161307	0.0642879	0.0016185	0.010479	AC021092.1	antisense
ENSG00000276790	4.44809	0.191125	0.0806197	0.00162083	0.010492	AC068234.3	antisense
ENSG00000260898	27.2196	-0.131564	0.0500417	0.00162189	0.010497	ADPGK-AS1	antisense
ENSG00000225194	239.752	0.14193	0.0542274	0.00162322	0.0105011	LINC00092	lincRNA
ENSG00000227157	7.33062	0.166605	0.0678451	0.00162659	0.010515	AC068535.1	lincRNA
ENSG00000269397	10.0489	0.149364	0.0583622	0.00163114	0.0105372	AC011503.2	sense_intronic
ENSG00000174403	90.5324	-0.148337	0.0579669	0.00163918	0.0105802	MIR1-1HG-AS1	antisense
ENSG00000228794	563.19	-0.087527	0.0302972	0.0016423	0.0105985	LINC01128	processed_transcript
ENSG00000277687	7.00324	-0.195318	0.0817646	0.00164585	0.0106178	AL139407.1	sense_intronic
ENSG00000250420	8.04549	-0.160784	0.0639376	0.00164641	0.0106196	AACSP1	transcribed_unprocessed_pseudogene
ENSG00000229407	9.64142	-0.188197	0.0786262	0.00164903	0.0106329	AL359853.1	antisense
ENSG00000223749	26.5783	0.138187	0.0533414	0.0016519	0.0106497	MIR503HG	lincRNA
ENSG00000260136	15.0373	0.17827	0.0753003	0.00165783	0.0106842	AC008915.2	lincRNA
ENSG00000167046	4.46308	0.18999	0.0802844	0.0016598	0.0106951	AL357033.1	antisense
ENSG00000254910	28.0412	0.170592	0.0696504	0.00167364	0.0107715	AC136475.2	antisense
ENSG00000279148	8.17626	0.150257	0.0588727	0.0016803	0.0108089	AC126474.1	TEC
ENSG00000270012	31.0756	0.105176	0.0379312	0.00168169	0.0108152	AC232271.1	lincRNA
ENSG00000273650	10.1582	0.189114	0.0810272	0.00168471	0.0108292	AC100793.4	lincRNA
ENSG00000244203	11.966	0.220297	0.100096	0.00170374	0.010932	FOXP1-AS1	antisense
ENSG00000275569	3.6493	0.224171	0.101043	0.00170785	0.010951	AL355073.2	antisense
ENSG00000271659	17.7564	0.138733	0.0550446	0.00171233	0.0109723	AL161729.4	antisense
ENSG00000253762	6.16114	-0.195029	0.0818616	0.00171656	0.010992	AC069133.1	lincRNA
ENSG00000198134	11.0033	0.142987	0.0566305	0.00172892	0.0110599	PTMAP9	processed_pseudogene
ENSG00000270179	9.17848	0.1607	0.0655958	0.0017401	0.0111259	AP002840.2	sense_intronic
ENSG00000226744	19.3742	-0.235162	0.10609	0.00174454	0.0111505	AC005326.1	processed_pseudogene
ENSG00000271888	2.40619	-0.215335	0.094439	0.00175619	0.0112183	AL136162.1	lincRNA
ENSG00000255203	2.23724	-0.23558	0.107698	0.00176208	0.0112438	OR7E2P	unprocessed_pseudogene
ENSG00000249140	4.81156	-0.202779	0.0878486	0.00176495	0.0112564	PRDX2P3	processed_pseudogene
ENSG00000248988	0.815398	-0.347808	0.169065	0.00176585	0.0112602	AC093700.1	processed_pseudogene
ENSG00000272316	80.2972	0.100643	0.0362349	0.00178144	0.0113464	AL021368.2	lincRNA
ENSG00000274364	4.26726	0.252999	0.123575	0.00178277	0.0113529	AL110115.1	sense_intronic
ENSG00000230513	42.3082	0.113358	0.0421269	0.00179566	0.0114178	THAP7-AS1	antisense
ENSG00000267801	16.5868	0.158823	0.0645135	0.0017988	0.0114359	AC087289.6	antisense
ENSG00000255111	1.22273	-0.318342	0.155339	0.00179913	0.0114361	AP006587.3	processed_pseudogene
ENSG00000213938	70.3855	-0.115851	0.0440923	0.00180165	0.0114464	SEPHS1P6	processed_pseudogene
ENSG00000273036	107.579	0.128772	0.049008	0.00180733	0.0114786	AL390726.5	transcribed_processed_pseudogene
ENSG00000265965	0.69437	0.39065	0.208767	0.00181439	0.0115196	MIR4266	miRNA
ENSG00000240859	31.423	-0.103378	0.0372261	0.00182111	0.0115584	AC093627.4	lincRNA
ENSG00000267541	20.7382	0.17199	0.0731306	0.00183292	0.0116237	MTCO2P2	processed_pseudogene
ENSG00000251230	0.902981	0.739973	0.205611	0.00183672	0.011639	MIR3945HG	lincRNA
ENSG00000266644	68.7879	0.269318	0.129696	0.00184035	0.0116591	AC103810.5	antisense
ENSG00000200087	3.08549	0.131973	0.152245	0.0018477	0.0116954	SNORA73B	snoRNA
ENSG00000227440	1.51114	0.313019	0.15791	0.00184908	0.0116989	ATP5MC1P4	processed_pseudogene
ENSG00000228960	2.07514	0.315214	0.158293	0.00185422	0.0117217	OR2A9P	transcribed_unprocessed_pseudogene
ENSG00000272823	2.80145	0.253816	0.121965	0.0018554	0.0117252	AL445423.1	lincRNA
ENSG00000217643	25.0094	-0.138406	0.0537633	0.00185708	0.0117299	PTGES3P2	processed_pseudogene
ENSG00000280435	47.5933	-0.164988	0.067517	0.00185785	0.0117329	AC006058.4	TEC
ENSG00000227920	1.24531	-0.310484	0.150386	0.00186391	0.0117692	AL353597.1	lincRNA
ENSG00000231195	16.2617	0.167993	0.0705738	0.00186526	0.0117758	IFNA11P	unprocessed_pseudogene
ENSG00000275119	1.81303	0.308292	0.15779	0.0018663	0.0117785	AC244131.2	lincRNA
ENSG00000259584	8.30227	0.161342	0.0667812	0.00186702	0.011781	AC021755.2	lincRNA
ENSG00000223764	26.9696	0.161559	0.0662066	0.00186752	0.0117822	LINC02593	lincRNA
ENSG00000269892	13.4444	0.175892	0.0750679	0.00186796	0.011783	AC125494.2	lincRNA
ENSG00000253257	1.95011	0.293076	0.151302	0.0018685	0.0117845	MTND4P7	processed_pseudogene
ENSG00000273851	0.84448	-0.37066	0.176579	0.00187474	0.011818	AC027088.4	transcribed_processed_pseudogene
ENSG00000246695	579.325	0.107286	0.0395569	0.00188178	0.0118567	RASSF8-AS1	antisense
ENSG00000280087	14.6014	0.153343	0.0628225	0.00188181	0.0118567	AC011481.4	TEC
ENSG00000254912	8.25699	0.248929	0.119218	0.0018847	0.011869	AC135983.3	unprocessed_pseudogene
ENSG00000255129	32.6446	-0.098849	0.0359274	0.00188599	0.0118751	AP000880.1	antisense
ENSG00000259343	3.74706	-0.173117	0.072	0.00188778	0.0118785	TMC3-AS1	antisense
ENSG00000226648	28.3327	0.131682	0.0511872	0.00188994	0.0118897	PLCG1-AS1	antisense
ENSG00000274099	0.899857	-0.364183	0.178373	0.00190624	0.0119808	ABCB10P1	processed_pseudogene
ENSG00000226659	17.527	0.178077	0.0758309	0.0019105	0.0119957	AC021028.1	antisense
ENSG00000225791	116.314	0.0833277	0.0291461	0.00191584	0.01202	TRAM2-AS1	lincRNA
ENSG00000232442	242.781	0.101848	0.0370805	0.00191585	0.01202	MHENCR	antisense
ENSG00000262587	44.8554	-0.0933493	0.0332994	0.00191595	0.01202	AC133552.2	transcribed_unprocessed_pseudogene
ENSG00000239921	2.16844	-0.229129	0.105194	0.00192048	0.0120425	LINC01471	lincRNA
ENSG00000272182	4.01015	0.193661	0.0858875	0.00192174	0.0120484	AC135507.1	antisense
ENSG00000278607	4.82901	0.20931	0.0947503	0.00192551	0.0120681	AC015819.2	lincRNA
ENSG00000232788	8.11947	0.144497	0.0579476	0.00192854	0.0120831	ITGA6-AS1	antisense
ENSG00000228862	1.36516	0.303158	0.160295	0.00193014	0.0120891	AC068389.1	lincRNA
ENSG00000237927	7.89761	0.198846	0.0889229	0.00193294	0.0121027	AL078604.2	lincRNA
ENSG00000229498	2.98627	0.225518	0.104373	0.00193812	0.0121311	AC105053.1	antisense
ENSG00000227770	1.82381	-0.263631	0.124029	0.00194743	0.0121774	RPL7P12	processed_pseudogene
ENSG00000252118	28.3196	0.237628	0.112616	0.00195096	0.0121954	RNU6ATAC39P	snRNA
ENSG00000249923	1.62395	-0.277721	0.134361	0.00195188	0.0121992	AC007663.2	antisense
ENSG00000279672	180.385	-0.131402	0.0509097	0.00195402	0.012208	AP006621.5	TEC
ENSG00000233820	50.7569	-0.0975935	0.0351396	0.00195649	0.012212	AL589843.2	transcribed_processed_pseudogene
ENSG00000242159	1.3835	-0.282392	0.136981	0.00195635	0.012212	ABCF2P1	processed_pseudogene
ENSG00000266573	2.34541	-0.251906	0.116816	0.0019657	0.0122614	AC018697.1	lincRNA
ENSG00000268658	10.2988	-0.169887	0.0709269	0.00196981	0.012283	LINC00664	lincRNA
ENSG00000212694	664.973	0.118966	0.0471077	0.00197067	0.0122835	LINC01089	lincRNA
ENSG00000231544	2.25975	0.2582	0.127164	0.00197118	0.0122835	RSL24D1P11	processed_pseudogene
ENSG00000262966	17.2904	-0.151222	0.0613961	0.0019711	0.0122835	AC005695.1	antisense
ENSG00000227953	53.7286	-0.129257	0.0498563	0.0019819	0.0123341	LINC01341	processed_transcript
ENSG00000235531	57.9413	-0.120548	0.0452388	0.00198556	0.0123508	MSC-AS1	antisense
ENSG00000253717	1.84827	-0.256692	0.122287	0.00199081	0.0123774	AP005357.1	lincRNA
ENSG00000273064	24.9442	0.119005	0.0454091	0.00199709	0.0124063	AC017083.1	antisense
ENSG00000271553	40.3526	0.115941	0.0436512	0.00200032	0.0124223	AC018638.7	lincRNA
ENSG00000268499	4.36136	0.186863	0.0825791	0.00200329	0.0124367	AC011479.2	sense_intronic
ENSG00000279565	6.74392	-0.17757	0.0756733	0.00200395	0.0124378	AL121835.2	TEC
ENSG00000253653	5.88519	-0.166531	0.0702951	0.00200489	0.0124406	AC009185.1	antisense
ENSG00000239930	0.595794	-0.397839	0.187203	0.00200817	0.0124548	AP001625.3	sense_intronic
ENSG00000236318	0.754138	-0.36738	0.178774	0.00201244	0.0124773	AC019117.2	lincRNA
ENSG00000228084	11.6939	-0.135013	0.0526085	0.00201394	0.0124846	AC118553.1	antisense
ENSG00000225724	7.2769	0.200295	0.0881307	0.00202198	0.0125323	ASH2LP3	unprocessed_pseudogene
ENSG00000232742	1.63943	0.243318	0.11353	0.00202759	0.0125548	RHOQP2	processed_pseudogene
ENSG00000235174	15.4805	0.176367	0.0751706	0.00202738	0.0125548	RPL39P3	processed_pseudogene
ENSG00000235875	8.99534	-0.137816	0.0543205	0.00202675	0.0125548	ARHGEF7-AS2	antisense
ENSG00000236790	223.575	0.131897	0.0526688	0.00202644	0.0125548	LINC00299	lincRNA
ENSG00000237133	9.28862	-0.132783	0.0521737	0.00203135	0.012572	AC020594.1	antisense
ENSG00000200714	14.9907	-0.13249	0.0512849	0.00203469	0.0125885	RF00019	misc_RNA
ENSG00000227606	5.59401	-0.211029	0.0959894	0.00204306	0.012638	AC005392.1	lincRNA
ENSG00000215374	41.2298	-0.157407	0.0646194	0.00204722	0.0126579	FAM66B	lincRNA
ENSG00000279334	1.56096	0.266945	0.134605	0.0020497	0.0126673	AC073592.6	TEC
ENSG00000269903	27.5319	-0.123431	0.0476889	0.0020517	0.0126732	AC025165.4	lincRNA
ENSG00000234446	1.05177	-0.309883	0.154203	0.00205652	0.0127009	AC068489.1	lincRNA
ENSG00000207611	36.5319	-0.230151	0.107499	0.0020574	0.0127043	MIR149	miRNA
ENSG00000271329	1.90069	0.253374	0.124653	0.00205987	0.0127154	AL035417.2	processed_pseudogene
ENSG00000227292	4.09474	-0.215595	0.0987013	0.00206686	0.0127503	AC009229.1	lincRNA
ENSG00000212567	1.34851	0.315843	0.174722	0.0020787	0.0128067	RF00191	snoRNA
ENSG00000239881	14.2215	0.171764	0.0736947	0.00209354	0.0128794	RPS27P25	transcribed_processed_pseudogene
ENSG00000235180	6.39695	0.179376	0.077116	0.00209636	0.0128926	LINC00601	lincRNA
ENSG00000236698	4.4849	-0.161936	0.0673911	0.00209819	0.0129009	EIF1AXP1	processed_pseudogene
ENSG00000259422	9.0818	-0.146933	0.0593746	0.00209859	0.0129009	AC091100.1	antisense
ENSG00000238829	9.5079	0.271421	0.138115	0.00210047	0.0129074	RNU7-45P	snRNA
ENSG00000282024	33.2353	0.173207	0.0745477	0.00211074	0.0129642	AL009031.1	antisense
ENSG00000258072	1.26256	-0.318901	0.158497	0.00211246	0.0129685	AC126177.6	processed_pseudogene
ENSG00000265113	13.6444	0.250311	0.123923	0.00211221	0.0129685	AC026474.1	sense_intronic
ENSG00000235885	2.4419	-0.235357	0.112058	0.00212034	0.013004	LINC01828	lincRNA
ENSG00000279663	23.3412	-0.142775	0.0570587	0.00212063	0.013004	AC104623.2	TEC
ENSG00000260615	2.80946	-0.229773	0.106533	0.00212852	0.0130377	RPL23AP97	processed_pseudogene
ENSG00000281103	14.899	0.20081	0.0917318	0.00212827	0.0130377	TRG-AS1	antisense
ENSG00000227088	1.26747	0.299176	0.153107	0.00213514	0.0130614	AC084149.1	lincRNA
ENSG00000205696	41.4695	0.181547	0.079061	0.0021441	0.0131078	ADARB2-AS1	antisense
ENSG00000182841	309.548	-0.0810299	0.0284785	0.00214488	0.0131104	RRP7BP	transcribed_unprocessed_pseudogene
ENSG00000215223	24.7856	0.227659	0.107361	0.00214915	0.0131302	CYP51A1P3	processed_pseudogene
ENSG00000259891	623.264	0.14551	0.0617079	0.00214983	0.0131302	AC107375.1	antisense
ENSG00000188242	106.836	-0.0544385	0.0182911	0.00215164	0.013137	AC010442.1	3prime_overlapping_ncRNA
ENSG00000177359	6.36097	-0.229198	0.107347	0.00215227	0.0131387	AC024940.2	transcribed_unprocessed_pseudogene
ENSG00000272461	0.647484	-0.43899	0.214586	0.00216939	0.0132305	AP005328.2	lincRNA
ENSG00000223956	1.4025	0.308725	0.164444	0.00217256	0.0132449	LINC01767	lincRNA
ENSG00000251396	63.7874	0.123466	0.04835	0.00217987	0.0132795	LINC01301	lincRNA
ENSG00000254198	22.0429	-0.146876	0.0596282	0.00218312	0.013295	AC113191.1	processed_pseudogene
ENSG00000239924	0.893244	-0.338238	0.168318	0.00218965	0.0133285	RPL29P22	processed_pseudogene
ENSG00000244361	6.94909	0.202426	0.0943412	0.00219638	0.013363	RPL30P7	processed_pseudogene
ENSG00000271384	3.31524	0.27028	0.141327	0.00220096	0.0133878	AL161729.3	lincRNA
ENSG00000235513	43.0728	0.133722	0.0539486	0.00222025	0.0134781	AL035681.1	antisense
ENSG00000248371	0.810692	-0.337519	0.179879	0.00222219	0.0134856	LINC02056	lincRNA
ENSG00000251794	2.54207	-0.213084	0.098532	0.00222293	0.0134879	RNU6-237P	snRNA
ENSG00000162840	1.91091	0.283515	0.148668	0.00222871	0.0135143	MT2P1	processed_pseudogene
ENSG00000279300	20.1741	-0.156966	0.0653929	0.00224122	0.0135772	AC008761.3	TEC
ENSG00000233729	4.4929	0.201394	0.0931671	0.00224336	0.0135858	NCKAP5-AS1	antisense
ENSG00000244625	36.9161	0.136132	0.0551359	0.00224904	0.0136181	MIATNB	lincRNA
ENSG00000196922	381.347	0.0805712	0.0285751	0.00225364	0.0136415	ZNF252P	transcribed_unprocessed_pseudogene
ENSG00000271766	1.47611	0.319352	0.177306	0.00226596	0.0137118	AC010424.2	lincRNA
ENSG00000253930	8.97531	0.383888	0.0941127	0.00226749	0.0137168	TNFRSF10A-AS1	antisense
ENSG00000236591	1.37074	0.278164	0.141915	0.00226804	0.0137178	AL357992.1	antisense
ENSG00000248294	1.14737	-0.310697	0.156068	0.00227253	0.0137406	AC008780.1	lincRNA
ENSG00000227038	6.42452	-0.219551	0.103597	0.00227771	0.013761	GTF2IP7	transcribed_unprocessed_pseudogene
ENSG00000228203	318.019	-0.0895053	0.0315306	0.00228503	0.0137921	RNF144A-AS1	processed_transcript
ENSG00000215478	15.0376	-0.129905	0.0510856	0.00229192	0.013825	CES5AP1	transcribed_unprocessed_pseudogene
ENSG00000262445	49.5519	0.207984	0.0966211	0.00229266	0.013825	AC099684.2	antisense
ENSG00000281160	10.4893	-0.206241	0.0936631	0.002292	0.013825	AC018358.1	antisense
ENSG00000203855	20.8804	-0.161685	0.0690681	0.00230205	0.0138749	HSD3BP4	unprocessed_pseudogene
ENSG00000244043	0.918368	0.331405	0.189	0.00230239	0.0138749	RPS27P27	processed_pseudogene
ENSG00000280168	7.27015	-0.157756	0.0667247	0.00230722	0.0139018	AC005274.1	TEC
ENSG00000237457	26.6197	0.147046	0.0602424	0.00230809	0.0139048	LINC01351	lincRNA
ENSG00000214145	3.96446	0.19913	0.0925177	0.00231212	0.0139201	LINC00887	lincRNA
ENSG00000232415	9.73313	0.14864	0.062567	0.00231722	0.0139443	ELN-AS1	antisense
ENSG00000268403	45.1409	0.124229	0.0491545	0.00231721	0.0139443	AC132192.2	antisense
ENSG00000276390	8.55154	0.166588	0.0726228	0.00231759	0.0139444	AC004241.3	sense_intronic
ENSG00000241170	87.9876	0.170119	0.074171	0.00232431	0.0139806	AP001992.1	transcribed_processed_pseudogene
ENSG00000249318	6.58298	-0.188551	0.0845946	0.00232528	0.0139834	AC010468.2	antisense
ENSG00000236007	2.82545	0.207458	0.0970508	0.00232673	0.0139881	MTCO1P46	processed_pseudogene
ENSG00000254363	27.2831	-0.237844	0.116546	0.00233328	0.0140122	AC011379.2	processed_transcript
ENSG00000224568	2.20624	-0.226441	0.107443	0.00233619	0.0140252	LINC01886	lincRNA
ENSG00000216906	5.01647	-0.180171	0.0784111	0.00233878	0.0140386	AL355312.1	processed_pseudogene
ENSG00000270512	0.526602	-0.443407	0.206591	0.00233969	0.0140396	AC005377.1	processed_pseudogene
ENSG00000228358	6.6113	-0.215093	0.0984385	0.00234368	0.0140547	LINC02263	lincRNA
ENSG00000251429	192.387	0.153569	0.0642231	0.00234357	0.0140547	AC098679.2	transcribed_processed_pseudogene
ENSG00000254154	4.63087	-0.199865	0.0897046	0.00234578	0.0140651	CRYZL2P-SEC16B	processed_transcript
ENSG00000238273	16.5261	-0.142983	0.0581909	0.00234847	0.0140768	AC108058.1	antisense
ENSG00000213801	14.7843	0.189672	0.0872237	0.00235006	0.0140818	ZNF321P	transcribed_processed_pseudogene
ENSG00000278598	2.20055	0.245809	0.122527	0.00235734	0.014121	MIR6775	miRNA
ENSG00000205361	8.75897	0.224021	0.109487	0.00236034	0.014135	MT1DP	transcribed_unprocessed_pseudogene
ENSG00000254127	18.239	-0.183636	0.0819246	0.00236041	0.014135	IGLCOR22-1	IG_C_pseudogene
ENSG00000215769	55.0324	0.0977393	0.0362069	0.00236117	0.0141373	ARHGAP27P1-BPTFP1-KPNA2P3	processed_transcript
ENSG00000231605	0.727534	-0.402394	0.206676	0.00236736	0.0141677	LINC01363	antisense
ENSG00000224259	0.711367	0.425855	0.258521	0.00237162	0.0141887	LINC01133	lincRNA
ENSG00000219150	8.8804	0.259367	0.133744	0.0023756	0.0142026	AL603914.1	processed_pseudogene
ENSG00000257261	15.5838	0.125506	0.0507269	0.00237609	0.0142026	AC008014.1	lincRNA
ENSG00000207258	3.27124	0.23799	0.11724	0.00238184	0.0142275	RF00019	misc_RNA
ENSG00000264028	7.47022	0.311248	0.174468	0.00238898	0.0142612	RN7SL744P	misc_RNA
ENSG00000259862	0.797339	0.33908	0.186778	0.00239063	0.014266	AC026336.2	lincRNA
ENSG00000183250	64.0723	-0.107219	0.0406406	0.00239842	0.0143018	LINC01547	lincRNA
ENSG00000267532	14.6085	0.170086	0.0750364	0.00240042	0.0143115	MIR497HG	antisense
ENSG00000255237	17.2965	0.190513	0.0874675	0.00240121	0.014314	AC138230.1	antisense
ENSG00000262133	2.66761	0.248916	0.128914	0.00240214	0.014315	AC087392.2	antisense
ENSG00000267653	18.8689	0.21238	0.0976485	0.00240424	0.0143253	AC002546.1	lincRNA
ENSG00000261671	17.4872	-0.137191	0.0553602	0.00240809	0.0143438	AL158211.1	lincRNA
ENSG00000236499	5.55311	-0.157484	0.0667644	0.00241775	0.01439	LINC00896	lincRNA
ENSG00000227582	9.701	-0.25686	0.12805	0.00242046	0.0144017	ADGRF5P1	transcribed_processed_pseudogene
ENSG00000258810	2.2983	0.252748	0.12972	0.00242283	0.014409	AL133371.2	antisense
ENSG00000237301	13.3566	-0.129959	0.0519411	0.00242719	0.014423	AL121992.1	antisense
ENSG00000258413	2.06769	-0.251518	0.12335	0.00242617	0.014423	AL158801.2	lincRNA
ENSG00000239559	4.81253	0.19188	0.089065	0.00242827	0.0144233	RPL37P2	processed_pseudogene
ENSG00000260468	3.84625	0.224819	0.111622	0.00243342	0.01445	LINC01290	lincRNA
ENSG00000226040	18.8113	-0.131492	0.0528974	0.00243546	0.0144592	AC005740.1	processed_pseudogene
ENSG00000203620	4.77847	0.257055	0.132429	0.0024445	0.0144982	AL354919.1	lincRNA
ENSG00000230415	62.3119	-0.106789	0.0404086	0.00244469	0.0144982	LINC01786	lincRNA
ENSG00000262681	12.0154	-0.148874	0.0618067	0.00245397	0.0145382	AC005722.2	lincRNA
ENSG00000274993	4.86149	-0.195459	0.091152	0.00245655	0.014545	AC254629.1	antisense
ENSG00000278948	17.689	0.18575	0.0832967	0.00245662	0.014545	AL031587.5	TEC
ENSG00000235760	17.0263	-0.11548	0.0445411	0.00245802	0.0145501	AC138655.1	antisense
ENSG00000266718	48.9626	-0.127595	0.0507361	0.00246362	0.0145719	AC079336.5	antisense
ENSG00000237250	1.80523	-0.256921	0.128316	0.00248707	0.01469	AL359924.1	antisense
ENSG00000248923	102.633	0.145513	0.060324	0.00249543	0.0147303	MTND5P11	processed_pseudogene
ENSG00000219992	6.54807	0.198697	0.0955591	0.00249823	0.0147422	AL391422.1	processed_pseudogene
ENSG00000257267	887.636	0.0757207	0.0268254	0.00250335	0.0147701	ZNF271P	transcribed_unitary_pseudogene
ENSG00000234062	38.2621	0.103526	0.0390855	0.00251246	0.014817	AL390879.1	transcribed_unprocessed_pseudogene
ENSG00000237624	9.16071	-0.177139	0.078344	0.00252641	0.0148831	OXCT2P1	unprocessed_pseudogene
ENSG00000277270	11.9543	-0.154841	0.0648716	0.00252832	0.0148921	AL160412.1	lincRNA
ENSG00000262692	51.6263	0.0495372	0.0605399	0.00253372	0.0149193	AC116914.2	antisense
ENSG00000277654	0.508603	-0.461059	0.210879	0.00253995	0.014949	AC087633.2	transcribed_processed_pseudogene
ENSG00000278446	6.10239	0.23642	0.121493	0.00254462	0.0149719	AC004852.3	processed_pseudogene
ENSG00000225498	3.68391	-0.202815	0.0932382	0.00254567	0.0149757	AC002064.1	lincRNA
ENSG00000165121	224.353	0.108793	0.0418277	0.00254767	0.0149852	AL353743.1	transcribed_unprocessed_pseudogene
ENSG00000236512	1.5217	0.275347	0.146926	0.00254937	0.0149912	AL390026.1	processed_pseudogene
ENSG00000273765	12.6261	-0.124157	0.0493526	0.00256441	0.015065	AC024257.4	lincRNA
ENSG00000253213	2.75186	-0.213259	0.1021	0.00257683	0.0151263	AC010306.1	processed_pseudogene
ENSG00000229494	2.19377	0.288577	0.161308	0.00257938	0.015135	AC012494.1	lincRNA
ENSG00000235296	22.5168	-0.135766	0.0553479	0.00258018	0.0151366	AC145207.1	antisense
ENSG00000235129	0.696264	-0.348012	0.181374	0.00258785	0.0151793	FABP7P2	processed_pseudogene
ENSG00000224307	23.0848	0.203045	0.0961368	0.00259582	0.015219	AL161785.1	lincRNA
ENSG00000227917	4.95499	0.233199	0.117123	0.00259678	0.0152223	AL449043.1	lincRNA
ENSG00000271474	87.1506	-0.109199	0.0422668	0.00259759	0.0152247	AC106881.1	antisense
ENSG00000228067	2.1987	0.262966	0.135972	0.00260007	0.0152369	LINC01740	lincRNA
ENSG00000278291	79.8323	-0.224521	0.040963	0.00260181	0.0152447	AL161772.1	antisense
ENSG00000278546	1.32857	0.286299	0.158347	0.00260338	0.0152492	AC003101.2	lincRNA
ENSG00000244586	4.08301	0.199191	0.0967148	0.00260392	0.0152501	WNT5A-AS1	antisense
ENSG00000196366	21.7466	-0.11286	0.0434061	0.002606	0.0152599	C9orf163	lincRNA
ENSG00000225125	29.7158	-0.118305	0.0462421	0.00260739	0.0152649	RANP4	processed_pseudogene
ENSG00000263232	4.04585	0.183539	0.0826268	0.00261786	0.0153105	ATP5F1AP3	processed_pseudogene
ENSG00000227179	0.75826	-0.4657	0.238326	0.00261984	0.0153174	PGCP1	transcribed_unprocessed_pseudogene
ENSG00000232852	7.7952	-0.190541	0.0877994	0.0026197	0.0153174	CICP4	processed_pseudogene
ENSG00000235111	9.47884	0.255764	0.137689	0.00262086	0.015321	Z97192.3	sense_intronic
ENSG00000259867	3.17819	-0.187392	0.0861813	0.00262305	0.0153314	AC105411.1	antisense
ENSG00000198155	66.5554	-0.110271	0.0426539	0.00262555	0.0153437	ZNF876P	transcribed_unprocessed_pseudogene
ENSG00000258922	5.82763	0.189507	0.0894254	0.0026265	0.0153458	AC106028.2	sense_intronic
ENSG00000230183	3.48593	-0.210952	0.099147	0.00265093	0.0154564	CNOT6LP1	processed_pseudogene
ENSG00000249741	3.24672	-0.182037	0.0813464	0.00265134	0.0154564	AC093890.1	processed_pseudogene
ENSG00000241155	4.67228	0.174105	0.0789405	0.00265369	0.0154677	ARHGAP31-AS1	antisense
ENSG00000269834	372.616	0.109365	0.0421912	0.00265459	0.0154706	ZNF528-AS1	processed_transcript
ENSG00000245322	5.78455	-0.143794	0.0602482	0.00266174	0.015498	AC097460.1	antisense
ENSG00000279082	39.7303	0.154328	0.066683	0.00266143	0.015498	LINC01727	lincRNA
ENSG00000251414	11.991	-0.146625	0.0613589	0.00267891	0.0155819	AC138956.2	antisense
ENSG00000255222	4.94412	0.18866	0.0873457	0.00268313	0.0156011	SETP17	processed_pseudogene
ENSG00000260751	16.0771	0.0402413	0.052903	0.00269104	0.0156376	AC008870.2	sense_intronic
ENSG00000231346	13.6473	0.12645	0.0513434	0.00270432	0.0156905	LINC01160	lincRNA
ENSG00000279398	8.57877	0.154234	0.0665555	0.0027253	0.0157932	AL078596.1	TEC
ENSG00000219881	11.7314	-0.162709	0.0714922	0.00272818	0.0158075	GAPDHP42	processed_pseudogene
ENSG00000255092	5.9731	0.232398	0.121276	0.00273515	0.0158357	AC010768.2	antisense
ENSG00000266261	11.1329	0.205208	0.101478	0.00273555	0.0158357	AC005324.5	antisense
ENSG00000275417	1.95473	-0.243134	0.128194	0.00274619	0.01589	AC068726.1	sense_intronic
ENSG00000241709	2.38961	0.25189	0.136667	0.00274883	0.0159029	RN7SL265P	misc_RNA
ENSG00000275367	158.433	-0.12173	0.0488104	0.00275095	0.015908	AC092111.1	lincRNA
ENSG00000279453	797.066	-0.0907329	0.0332224	0.00275037	0.015908	Z99129.4	TEC
ENSG00000228638	67.0709	0.0789553	0.0285379	0.00275339	0.0159172	FCF1P2	transcribed_processed_pseudogene
ENSG00000274008	7.34699	0.250589	0.131107	0.00275385	0.0159175	RF00017	misc_RNA
ENSG00000231134	0.609977	0.370191	0.205629	0.00275681	0.0159321	TCF7L1-IT1	sense_intronic
ENSG00000260698	17.8183	0.118264	0.0473771	0.002771	0.0159996	AL591848.3	lincRNA
ENSG00000235012	3.62801	0.193277	0.0919988	0.00277451	0.016015	AF121897.1	processed_pseudogene
ENSG00000264727	8.89251	0.174176	0.0810114	0.00278432	0.0160643	AC005725.1	lincRNA
ENSG00000232710	1.51051	-0.272305	0.142354	0.00279001	0.0160874	AC254562.2	lincRNA
ENSG00000261596	16.8986	0.121023	0.0494857	0.00279474	0.0161073	AC005632.2	sense_intronic
ENSG00000237357	8.08403	0.183214	0.0862545	0.00281882	0.0162215	BX088651.4	lincRNA
ENSG00000228135	8.18947	-0.150919	0.0651324	0.00281965	0.0162218	LINC01494	antisense
ENSG00000267026	2.57981	-0.199232	0.0938358	0.00281972	0.0162218	AL136084.2	antisense
ENSG00000279976	2.28652	0.263172	0.147338	0.00285625	0.0163973	AC073862.4	TEC
ENSG00000232739	31.4309	0.155045	0.067204	0.00285731	0.0164009	AL607028.1	antisense
ENSG00000278552	0.796604	-0.353041	0.185419	0.00286477	0.0164288	AC116165.3	unprocessed_pseudogene
ENSG00000225450	3.71707	0.177948	0.0826504	0.00287651	0.0164862	AL021707.1	antisense
ENSG00000228162	0.967259	-0.317884	0.174403	0.00287945	0.0165006	AC097713.1	lincRNA
ENSG00000270124	3.55767	0.203392	0.100975	0.00288162	0.0165105	AC092127.2	lincRNA
ENSG00000257331	1.69392	-0.253338	0.130883	0.00288639	0.0165329	RACGAP1P	processed_pseudogene
ENSG00000124915	10.256	0.176363	0.0814128	0.00288925	0.0165393	AP002380.1	lincRNA
ENSG00000203258	13.4146	0.228454	0.117631	0.00288923	0.0165393	AC013549.1	antisense
ENSG00000272293	10.2877	0.149313	0.0646202	0.00288856	0.0165393	AC083964.1	antisense
ENSG00000242779	59.0923	-0.135098	0.0559252	0.00290498	0.0166119	ZNF702P	transcribed_processed_pseudogene
ENSG00000281333	2.63778	-0.194196	0.0912984	0.00291028	0.0166346	AC024941.2	antisense
ENSG00000271235	1.00197	-0.321961	0.186014	0.00291364	0.0166514	AC114477.1	processed_pseudogene
ENSG00000232952	0.596333	-0.385966	0.193869	0.00292636	0.016709	AL512844.1	processed_pseudogene
ENSG00000274020	162.158	0.0730803	0.0263992	0.0029272	0.0167113	LINC01138	processed_transcript
ENSG00000279512	2.25387	0.242872	0.132856	0.00292934	0.0167191	AC011755.1	TEC
ENSG00000271499	2.19129	-0.227507	0.112643	0.0029359	0.0167434	AC011477.6	processed_pseudogene
ENSG00000277142	19.9569	-0.107001	0.0413623	0.00294379	0.0167809	LINC00235	lincRNA
ENSG00000250514	2.52117	-0.202199	0.0972037	0.00294702	0.0167942	LINC02125	lincRNA
ENSG00000279283	156.401	0.168354	0.076212	0.00295708	0.0168415	AC131009.4	TEC
ENSG00000274797	1.15024	0.272836	0.150226	0.00296409	0.0168764	AC008121.3	antisense
ENSG00000228288	62.1576	0.109273	0.0429571	0.00297499	0.0169257	PCAT6	antisense
ENSG00000254990	10.7959	0.160228	0.0720038	0.00297604	0.0169292	AP001781.1	lincRNA
ENSG00000229278	9.74383	-0.151666	0.0665689	0.00298071	0.0169507	AL133353.1	bidirectional_promoter_lncRNA
ENSG00000239911	344.84	-0.0918619	0.0341769	0.0029821	0.0169561	PRKAG2-AS1	antisense
ENSG00000269356	6.89479	0.155854	0.0684255	0.00298749	0.0169841	AL356740.2	sense_intronic
ENSG00000254916	2.71117	-0.250767	0.131413	0.00299438	0.0170183	AP004607.4	unprocessed_pseudogene
ENSG00000255174	1.30402	-0.272017	0.143518	0.00300179	0.0170527	AC107918.3	processed_pseudogene
ENSG00000268615	5.21129	-0.223838	0.11373	0.00300703	0.0170748	AL353803.5	lincRNA
ENSG00000247271	115.779	0.0981526	0.0375578	0.00300894	0.0170829	ZBED5-AS1	antisense
ENSG00000162997	26.8952	-0.091556	0.0344651	0.00301694	0.017121	PRORSD1P	transcribed_unitary_pseudogene
ENSG00000250786	35.9709	0.151034	0.0654755	0.00302247	0.0171446	SNHG18	lincRNA
ENSG00000248719	4.10299	-0.16869	0.0754372	0.00304501	0.0172403	AC021127.1	antisense
ENSG00000233538	9.26247	0.215701	0.111706	0.00304735	0.0172464	AC017104.3	lincRNA
ENSG00000275854	11.1082	0.134335	0.0555246	0.00305366	0.0172726	AC084824.4	sense_intronic
ENSG00000267746	2.24055	-0.21247	0.10418	0.00305759	0.0172897	AC104985.1	antisense
ENSG00000225639	0.79705	-0.3389	0.186866	0.00306148	0.0173065	PGAM1P2	processed_pseudogene
ENSG00000266315	1.21771	0.29525	0.178644	0.00306999	0.0173443	MIR4668	miRNA
ENSG00000199627	66.1033	0.203235	0.0974731	0.00307109	0.017348	RNU6-1010P	snRNA
ENSG00000237347	3.45728	-0.211121	0.10602	0.00307786	0.0173811	AC004461.1	processed_pseudogene
ENSG00000232118	1.84043	0.218334	0.111047	0.00309909	0.017475	BACH1-AS1	lincRNA
ENSG00000257696	6.35819	-0.145124	0.0629798	0.00310297	0.0174943	AC010203.2	antisense
ENSG00000213700	25.8654	0.17398	0.0813321	0.003121	0.0175829	RPL17P50	processed_pseudogene
ENSG00000243103	7.76846	0.205575	0.104825	0.00312686	0.0176104	RN7SL452P	misc_RNA
ENSG00000279166	9.03711	0.164875	0.0760799	0.00312725	0.0176104	AC009951.1	TEC
ENSG00000248508	196.577	0.122217	0.049861	0.00313673	0.0176533	SRP14-AS1	bidirectional_promoter_lncRNA
ENSG00000218749	4.65679	0.221188	0.117056	0.00314241	0.01768	AL033519.1	processed_pseudogene
ENSG00000162913	38.8312	-0.114471	0.0457748	0.00314671	0.0176982	OBSCN-AS1	antisense
ENSG00000201785	0.67708	-0.362613	0.194389	0.00314704	0.0176982	SNORD117	snoRNA
ENSG00000230839	69.5299	0.136733	0.0581817	0.00315187	0.0177149	AL121760.1	lincRNA
ENSG00000272609	2.87401	0.228761	0.117492	0.00315586	0.0177295	AC016252.1	antisense
ENSG00000255583	2.05692	-0.267869	0.141476	0.00315937	0.017744	AC084357.3	transcribed_unprocessed_pseudogene
ENSG00000255146	0.83744	-0.327432	0.179468	0.00318587	0.0178769	AP004247.2	lincRNA
ENSG00000231970	3.30471	0.257239	0.148243	0.00318729	0.0178796	AL355490.2	antisense
ENSG00000278733	5.81363	-0.147931	0.0647736	0.00318965	0.0178892	AC022079.2	antisense
ENSG00000257069	3.17723	-0.209189	0.10448	0.00319445	0.0179119	AP001453.3	processed_transcript
ENSG00000229559	2.41961	-0.232591	0.121606	0.00321585	0.0180054	AL353597.2	transcribed_processed_pseudogene
ENSG00000250125	26.9644	-0.118549	0.048162	0.00322124	0.0180302	LINC02232	lincRNA
ENSG00000247796	57.0877	-0.0943425	0.0358806	0.00323794	0.0181157	AC008966.1	antisense
ENSG00000232192	8.07766	0.211045	0.1088	0.00324295	0.0181358	KIF26B-AS1	antisense
ENSG00000281571	14.0419	-0.156303	0.0694802	0.00324394	0.0181386	AC241585.2	TEC
ENSG00000253641	75.8786	-0.0971119	0.0374115	0.00324592	0.0181462	AC104964.1	lincRNA
ENSG00000228721	0.585706	0.380729	0.231684	0.00324916	0.0181557	AC016909.1	processed_pseudogene
ENSG00000272707	6.7103	0.145243	0.0631295	0.00324986	0.0181557	AC046143.2	lincRNA
ENSG00000216775	59.5323	-0.112359	0.0448002	0.00325095	0.0181592	AL109918.1	transcribed_unprocessed_pseudogene
ENSG00000264534	4.87922	-0.188085	0.0888419	0.00326915	0.0182367	MIR378B	miRNA
ENSG00000133519	508.32	0.0912815	0.03364	0.00327183	0.0182463	ZDHHC8P1	transcribed_unprocessed_pseudogene
ENSG00000236819	55.3602	0.0743486	0.027226	0.0032762	0.01826	LINC01563	lincRNA
ENSG00000238965	0.838338	0.321433	0.212126	0.00328043	0.0182782	RNA5SP351	rRNA_pseudogene
ENSG00000278971	9.44762	-0.185258	0.0875793	0.00328269	0.018286	AC091305.1	TEC
ENSG00000232891	2.79388	0.191234	0.0928844	0.00328765	0.0183077	AL450344.3	sense_intronic
ENSG00000255367	10.2736	-0.154043	0.0687604	0.00329418	0.0183387	AC127526.2	processed_transcript
ENSG00000277692	39.5494	-0.102279	0.0397689	0.00329549	0.0183419	AL121583.1	lincRNA
ENSG00000259694	1.05131	-0.297687	0.172659	0.0032973	0.0183426	AC136698.1	lincRNA
ENSG00000279434	66.8699	0.0362117	0.0390762	0.00329844	0.0183463	AL049776.1	TEC
ENSG00000266605	0.677397	-0.415676	0.232729	0.00330527	0.0183816	LONRF2P1	processed_pseudogene
ENSG00000251867	43.3052	-0.12378	0.0508626	0.00330918	0.0184007	AC009812.1	antisense
ENSG00000269825	45.3494	0.140673	0.0620067	0.00332719	0.0184885	AC022150.4	sense_intronic
ENSG00000229970	0.658809	-0.364606	0.194143	0.00333338	0.0185122	AC007128.1	antisense
ENSG00000229358	128.498	0.0774172	0.0286133	0.00333735	0.0185275	DPY19L1P1	unprocessed_pseudogene
ENSG00000226794	0.603689	0.361069	0.236169	0.00334273	0.018552	MTND1P20	processed_pseudogene
ENSG00000202361	0.459997	0.419999	0.230695	0.00334584	0.018556	RF00019	misc_RNA
ENSG00000265973	3.70356	0.234749	0.130314	0.00334543	0.018556	AP006587.6	unprocessed_pseudogene
ENSG00000264174	1.37353	0.268871	0.156454	0.00336262	0.0186298	AC005552.1	lincRNA
ENSG00000224016	4.28533	-0.160285	0.0725595	0.00336784	0.0186533	AC092681.1	unprocessed_pseudogene
ENSG00000278768	89.5896	0.0701261	0.0253509	0.00337782	0.0186952	BACE1-AS	processed_transcript
ENSG00000271500	10.5087	0.193709	0.0976117	0.0033832	0.0187165	AC005183.1	processed_pseudogene
ENSG00000237919	4.97687	-0.182662	0.0885085	0.00338923	0.0187312	AL158840.1	antisense
ENSG00000273319	695.468	0.221766	0.114544	0.00338929	0.0187312	AC058791.1	lincRNA
ENSG00000232579	6.6898	0.224817	0.12269	0.00339358	0.018746	MTCO1P27	unprocessed_pseudogene
ENSG00000273654	14.2729	0.124866	0.0521507	0.00339394	0.018746	AC020904.2	transcribed_processed_pseudogene
ENSG00000271933	7.1165	-0.157858	0.0708232	0.00340075	0.0187755	AL603756.1	antisense
ENSG00000272446	1.09909	-0.274287	0.155885	0.0034009	0.0187755	AL158850.1	processed_transcript
ENSG00000214602	4.0143	-0.19672	0.0960038	0.00340807	0.0188049	CTBP2P5	processed_pseudogene
ENSG00000226329	4.31572	0.172313	0.0822963	0.00342073	0.0188695	AC005682.1	unprocessed_pseudogene
ENSG00000241889	19.2662	0.155355	0.0712536	0.00343883	0.0189527	AC079944.2	processed_pseudogene
ENSG00000243116	6.25167	-0.170469	0.0794722	0.00344383	0.0189747	AC092943.1	processed_pseudogene
ENSG00000176754	2.41746	0.225728	0.121856	0.00345488	0.0190218	LINC00303	lincRNA
ENSG00000229567	3.10182	0.188555	0.0940195	0.00345923	0.0190403	AL139421.1	processed_pseudogene
ENSG00000168992	2.59325	-0.18799	0.0911325	0.00345981	0.0190407	OR7E102P	unprocessed_pseudogene
ENSG00000275894	2.70842	0.251254	0.137216	0.00347566	0.0191031	AL021578.1	sense_intronic
ENSG00000259503	1.92621	0.246926	0.141152	0.00349185	0.0191755	AC048383.1	lincRNA
ENSG00000260600	6.0396	0.201851	0.104484	0.00349416	0.0191852	AC092125.1	sense_intronic
ENSG00000225630	12199.1	0.234834	0.113367	0.00350614	0.0192456	MTND2P28	unprocessed_pseudogene
ENSG00000232044	398.388	0.100983	0.039585	0.00351126	0.0192654	SILC1	processed_transcript
ENSG00000275450	13.339	-0.146427	0.0639338	0.00351046	0.0192654	AL845472.1	lincRNA
ENSG00000226899	14.195	0.246243	0.140318	0.00351902	0.019294	AL731577.1	antisense
ENSG00000282951	39.5776	0.143455	0.0626387	0.00352783	0.0193284	AC008537.4	antisense
ENSG00000272572	6.64583	-0.147438	0.0651775	0.00353379	0.0193555	AL138762.1	antisense
ENSG00000123965	24.2349	-0.145735	0.0642306	0.00353645	0.0193639	PMS2P5	unprocessed_pseudogene
ENSG00000274184	41.4605	0.157267	0.0719426	0.00353758	0.0193651	AC011815.2	lincRNA
ENSG00000214381	5.56467	-0.203441	0.102729	0.00354032	0.0193739	LINC00488	processed_transcript
ENSG00000279872	1.44649	-0.00135883	0.0663586	0.00354329	0.0193852	AC006435.4	TEC
ENSG00000253932	10.6476	0.187855	0.0948764	0.00355008	0.0194147	AC019270.1	antisense
ENSG00000226567	4.01248	0.176762	0.0845138	0.00355504	0.0194383	LINC00606	lincRNA
ENSG00000231952	15.968	0.120964	0.0504859	0.00355619	0.0194418	DPY19L1P2	unprocessed_pseudogene
ENSG00000217783	1.29154	-0.241524	0.12952	0.00356195	0.0194677	LDHAL6FP	processed_pseudogene
ENSG00000272128	11.4894	0.142645	0.0631237	0.00356373	0.0194746	AP006545.2	lincRNA
ENSG00000241135	4.18198	-0.19799	0.097621	0.00358134	0.0195456	LINC00881	lincRNA
ENSG00000200651	42.0835	0.224432	0.120845	0.00358317	0.0195528	RF00019	misc_RNA
ENSG00000230666	1.92981	0.228987	0.124363	0.00359975	0.0196283	CEACAM22P	transcribed_unprocessed_pseudogene
ENSG00000249087	264.425	-0.0768884	0.0289905	0.00360063	0.0196283	ZNF436-AS1	antisense
ENSG00000279400	60.1226	-0.191816	0.0952608	0.00361401	0.0196787	AC008957.3	TEC
ENSG00000259673	56.5106	0.073076	0.0270659	0.00361714	0.0196929	IQCH-AS1	lincRNA
ENSG00000242610	0.658248	0.381876	0.267292	0.00362847	0.0197462	OR5BH1P	unprocessed_pseudogene
ENSG00000261963	71.3956	-0.119954	0.0496682	0.00363572	0.0197828	CCDC92B	unitary_pseudogene
ENSG00000264834	3.62845	-0.18159	0.0888285	0.00366046	0.0199089	AC099677.5	miRNA
ENSG00000227973	24.6926	0.183062	0.0911316	0.00366367	0.0199235	PIN4P1	processed_pseudogene
ENSG00000252916	2.1797	-0.196146	0.0967786	0.00367964	0.0200018	RNU6-762P	snRNA
ENSG00000229268	5.6358	-0.185852	0.0923499	0.00368132	0.020008	PES1P2	processed_pseudogene
ENSG00000250230	1.14216	-0.250138	0.137754	0.00368563	0.0200258	AP002754.1	lincRNA
ENSG00000274105	28.7179	0.146226	0.0659574	0.00369496	0.0200621	AC084824.3	sense_intronic
ENSG00000233578	3.73581	-0.213552	0.110805	0.00369552	0.0200623	EIF4EP1	processed_pseudogene
ENSG00000267419	71.0502	0.0137397	0.0472962	0.00369623	0.0200633	AC011477.1	transcribed_unprocessed_pseudogene
ENSG00000267643	1.01311	-0.294348	0.175438	0.0036977	0.0200655	AP005264.4	lincRNA
ENSG00000198221	26.5919	-0.108305	0.0439705	0.00370516	0.0200974	AFDN-DT	lincRNA
ENSG00000273568	8.92904	-0.126374	0.0530305	0.00370864	0.0201106	AC131009.3	sense_intronic
ENSG00000262003	15.2111	0.205778	0.10976	0.00371799	0.0201526	AC087392.1	antisense
ENSG00000276317	3.98679	0.206304	0.10625	0.00373639	0.020238	AL357033.3	antisense
ENSG00000227863	1.66319	-0.226354	0.120984	0.00374128	0.0202616	AC002383.1	lincRNA
ENSG00000183458	184.225	-0.152533	0.0692666	0.00374271	0.0202665	AC138932.1	transcribed_unprocessed_pseudogene
ENSG00000225123	2.92217	-0.200181	0.101093	0.00375251	0.0203054	AL139008.1	processed_pseudogene
ENSG00000251271	2.0645	-0.205392	0.105544	0.00375531	0.0203144	ALG1L7P	unprocessed_pseudogene
ENSG00000254739	12.4353	0.14609	0.0656832	0.00377165	0.020371	AC137894.1	antisense
ENSG00000259865	106.785	0.12617	0.0529383	0.00377145	0.020371	AL390728.6	lincRNA
ENSG00000215158	114.557	0.14686	0.068229	0.00377752	0.0203948	AC138409.2	transcribed_unprocessed_pseudogene
ENSG00000273957	1.11986	-0.261083	0.15175	0.0037782	0.0203948	AC113385.2	unprocessed_pseudogene
ENSG00000277496	11.1572	0.162471	0.0762998	0.00378867	0.0204368	AL357033.4	antisense
ENSG00000207654	4.93935	-0.189586	0.0938444	0.003798	0.0204726	MIR128-1	miRNA
ENSG00000259104	8.55788	0.18498	0.0931897	0.00380144	0.0204854	PTCSC3	lincRNA
ENSG00000229422	15.5231	-0.18603	0.0898904	0.00381077	0.020524	AL512625.2	lincRNA
ENSG00000279834	3.95712	-0.169511	0.0800445	0.00381423	0.0205397	AC068870.3	TEC
ENSG00000262833	30.838	0.215479	0.118241	0.00381921	0.0205607	AC016245.1	antisense
ENSG00000250156	40.8554	0.117487	0.0492645	0.00382552	0.020586	LINC02060	lincRNA
ENSG00000259483	2.30881	0.231499	0.133743	0.00383501	0.0206167	AL355073.1	lincRNA
ENSG00000222398	12.0302	0.16554	0.0797296	0.00383618	0.02062	RNU6-554P	snRNA
ENSG00000269867	217.018	0.0334474	0.0448886	0.00383873	0.0206279	AC010326.3	sense_intronic
ENSG00000224164	1.4488	0.240085	0.134445	0.00384177	0.0206358	AL133264.2	lincRNA
ENSG00000249453	14.4548	-0.135387	0.0593894	0.00384554	0.02065	AC092834.1	antisense
ENSG00000206895	3.43203	0.221552	0.126335	0.00386598	0.0207484	RF00019	misc_RNA
ENSG00000207162	5.00017	0.200354	0.106883	0.00386927	0.0207598	RNU6-549P	snRNA
ENSG00000263508	4.83375	0.177272	0.0867408	0.0038826	0.0208166	AC015908.2	lincRNA
ENSG00000177725	2.89842	0.237956	0.143893	0.00388705	0.0208287	AC105206.1	sense_overlapping
ENSG00000269296	0.762781	-0.301063	0.175961	0.00388842	0.0208331	AC005614.1	antisense
ENSG00000259775	74.2003	-0.105407	0.0428108	0.00389282	0.020845	AL138976.2	antisense
ENSG00000277373	2.37897	0.187096	0.0934178	0.00389556	0.0208548	AL132765.2	sense_intronic
ENSG00000273125	23.7383	-0.123521	0.0524942	0.00390009	0.0208751	LINC01990	lincRNA
ENSG00000229068	1.05971	-0.2763	0.169814	0.00390193	0.020882	TMPOP1	processed_pseudogene
ENSG00000260604	4.1947	0.213688	0.115436	0.0039041	0.0208878	AL590004.3	lincRNA
ENSG00000259664	7.15404	-0.154927	0.0704466	0.00391429	0.0209332	LINC02254	lincRNA
ENSG00000267420	1.81459	-0.212705	0.111624	0.00391479	0.0209332	AC007993.2	lincRNA
ENSG00000184608	13.2863	0.143197	0.0649822	0.00393534	0.0210371	FAM167A-AS1	antisense
ENSG00000229257	0.821053	0.302416	0.221062	0.00393987	0.0210465	AL807752.2	antisense
ENSG00000278192	28.6899	0.139089	0.0621644	0.00393946	0.0210465	AL118505.1	lincRNA
ENSG00000280149	19.9691	0.0840751	0.0323163	0.00393881	0.0210465	AC004877.2	TEC
ENSG00000199161	12.6016	0.17978	0.0904941	0.00394602	0.0210735	MIR126	miRNA
ENSG00000238040	1.41659	0.258525	0.15555	0.00394963	0.0210898	SALL4P2	processed_pseudogene
ENSG00000275371	13.1927	0.159663	0.0760195	0.003954	0.0211082	AC012645.4	antisense
ENSG00000271815	20.337	-0.127579	0.0547894	0.0039591	0.0211285	AC008897.3	lincRNA
ENSG00000212460	3.33288	-0.167179	0.0789709	0.00396118	0.0211366	RNU6-460P	snRNA
ENSG00000228808	6.04515	0.176585	0.08863	0.00396665	0.0211599	HMGB3P4	processed_pseudogene
ENSG00000231628	7.81302	-0.14477	0.0643588	0.0039694	0.0211716	AL133406.2	antisense
ENSG00000204990	7.19373	0.166508	0.0812317	0.00397588	0.0211998	AC005692.1	lincRNA
ENSG00000278925	6.04596	-0.15919	0.0753373	0.00397998	0.0212132	AC005753.1	lincRNA
ENSG00000273175	2.70372	-0.179725	0.0874813	0.00398363	0.0212297	BX323046.1	lincRNA
ENSG00000211563	7.16127	0.158617	0.0765266	0.00398933	0.0212541	MIR3065	miRNA
ENSG00000236262	12.6621	0.16992	0.0837304	0.00399473	0.0212799	SHANK2-AS2	antisense
ENSG00000214846	1.11487	0.25986	0.155351	0.0039978	0.0212903	AC114744.1	processed_pseudogene
ENSG00000268458	9.46927	0.128352	0.0551212	0.00400319	0.021313	AC011468.3	lincRNA
ENSG00000224613	3.74886	-0.170328	0.080705	0.0040079	0.0213351	AC095032.1	bidirectional_promoter_lncRNA
ENSG00000224566	8.49875	-0.15423	0.0718724	0.00400993	0.0213426	FAM96AP2	processed_pseudogene
ENSG00000259764	4.42846	0.214638	0.120371	0.00401275	0.021349	PCSK6-AS1	antisense
ENSG00000244391	0.581067	-0.389362	0.211485	0.00402756	0.0214188	RN7SL330P	misc_RNA
ENSG00000224430	17.2573	0.150855	0.0706881	0.0040337	0.0214484	MKRN5P	processed_pseudogene
ENSG00000267199	72.0724	0.113063	0.0468699	0.00405282	0.021532	AP001029.2	antisense
ENSG00000275213	1.03335	0.279816	0.236243	0.00405802	0.0215536	RF00017	misc_RNA
ENSG00000225855	189.846	0.0899428	0.0352268	0.00406236	0.0215737	RUSC1-AS1	antisense
ENSG00000266527	2.37621	-0.212067	0.113261	0.00406725	0.0215966	AC005697.2	antisense
ENSG00000207550	0.781053	0.300764	0.21554	0.00407164	0.0216109	MIR99B	miRNA
ENSG00000223561	10.5598	-0.120318	0.0512296	0.00407399	0.0216181	AC005165.1	lincRNA
ENSG00000231170	19.8168	0.162695	0.077171	0.00407899	0.0216376	AC002451.1	processed_transcript
ENSG00000263745	1.06078	-0.271693	0.160912	0.00408557	0.0216637	AP005230.1	lincRNA
ENSG00000212125	9.63092	-0.138834	0.0610856	0.00409267	0.0216953	TAS2R15P	unprocessed_pseudogene
ENSG00000259354	9.80163	0.163317	0.0800252	0.00409474	0.0217003	AC025580.2	antisense
ENSG00000182632	2.64303	-0.217914	0.115779	0.00410596	0.0217476	CCNYL2	transcribed_unprocessed_pseudogene
ENSG00000229831	4.93317	0.161544	0.0768558	0.0041076	0.0217532	AC108039.2	processed_pseudogene
ENSG00000223519	26.0018	-0.114657	0.0482277	0.0041117	0.0217689	KIF28P	transcribed_unitary_pseudogene
ENSG00000218175	10.0752	0.128101	0.0560671	0.0041158	0.0217822	AC016739.1	processed_pseudogene
ENSG00000226261	5.20427	-0.169275	0.0815452	0.00411834	0.021792	AC064836.1	processed_pseudogene
ENSG00000270728	83.0908	0.108377	0.0437923	0.00412635	0.0218283	AL035413.1	processed_pseudogene
ENSG00000212766	12.6262	-0.137055	0.0600174	0.00414418	0.0219074	EWSAT1	lincRNA
ENSG00000214870	47.2348	-0.118413	0.0498142	0.00415417	0.021948	AC004540.1	lincRNA
ENSG00000260404	164.066	-0.0892589	0.0349597	0.00415602	0.0219547	AC110079.1	transcribed_unprocessed_pseudogene
ENSG00000229846	0.83103	-0.288637	0.174032	0.00416085	0.0219771	AC099788.1	antisense
ENSG00000227712	1.88269	-0.200324	0.104234	0.00416926	0.0220124	AL359915.1	lincRNA
ENSG00000275443	2.64294	0.208885	0.116894	0.00418771	0.0220853	AC012409.2	lincRNA
ENSG00000255886	1.41465	0.238949	0.139708	0.00419031	0.0220959	AC020611.2	antisense
ENSG00000241014	84.9301	-0.100662	0.0410226	0.00420443	0.0221612	AC114490.1	transcribed_unitary_pseudogene
ENSG00000279640	6.90315	-0.141433	0.0635975	0.00420917	0.0221831	AC138466.5	TEC
ENSG00000225778	23.4276	-0.114479	0.0481518	0.00423057	0.0222712	PROSER2-AS1	antisense
ENSG00000246985	40.1986	-0.0928548	0.0367817	0.00423656	0.0222935	SOCS2-AS1	processed_transcript
ENSG00000238184	9.99817	-0.137026	0.0613451	0.00423961	0.0223003	CD81-AS1	antisense
ENSG00000280776	44.5847	-0.157475	0.0740988	0.0042479	0.0223408	LINC01202	lincRNA
ENSG00000250286	5.32953	-0.172345	0.0847011	0.00424937	0.0223444	AC021491.2	processed_transcript
ENSG00000206532	8.92424	-0.17326	0.0841359	0.00425405	0.0223577	AC117402.1	lincRNA
ENSG00000265939	0.907872	-0.266696	0.159906	0.00425681	0.0223691	UBE2CP2	processed_pseudogene
ENSG00000248866	19.4835	-0.136002	0.0604161	0.00426362	0.0223925	USP46-AS1	lincRNA
ENSG00000229613	0.878733	-0.308162	0.184497	0.00428899	0.0225065	LINC01501	lincRNA
ENSG00000253842	1.5049	-0.231462	0.132976	0.00429289	0.0225214	AP003472.2	lincRNA
ENSG00000228528	27.8964	0.112249	0.046912	0.00430245	0.0225622	AC068057.1	lincRNA
ENSG00000181798	29.0726	-0.118016	0.0503678	0.00433505	0.022705	LINC00471	lincRNA
ENSG00000232063	8.28792	-0.169424	0.0836808	0.0043382	0.0227184	AL691447.2	lincRNA
ENSG00000263826	20.9465	-0.114269	0.0475291	0.00435418	0.0227927	AC112907.3	antisense
ENSG00000206878	3.54495	-0.201204	0.107827	0.00436176	0.0228233	RF00432	snoRNA
ENSG00000253837	16.6709	-0.116585	0.049477	0.00436639	0.0228351	AC090197.1	processed_transcript
ENSG00000272226	3.44288	-0.153386	0.0720383	0.00437773	0.0228813	AL136985.2	lincRNA
ENSG00000265374	1.66538	-0.219507	0.123381	0.00438835	0.0229274	LINC01908	lincRNA
ENSG00000229932	5.28357	-0.149985	0.0692191	0.00439117	0.022939	YWHAZP3	processed_pseudogene
ENSG00000280200	1.82898	0.25518	0.16294	0.00439855	0.0229712	AC073862.5	TEC
ENSG00000233304	8.08847	-0.164387	0.0785384	0.00440301	0.0229914	LINC01346	lincRNA
ENSG00000281383	53.5255	0.159048	0.076583	0.00442506	0.0230875	FP671120.5	lincRNA
ENSG00000270640	8.59476	0.0537774	0.0743228	0.00442777	0.0230984	AC104695.4	sense_intronic
ENSG00000227512	6.15622	0.195878	0.106172	0.00444401	0.0231768	AL592301.1	antisense
ENSG00000207736	7.60122	0.16166	0.0782851	0.00445583	0.0232353	MIR657	miRNA
ENSG00000245849	255.204	0.0796322	0.0292733	0.00445855	0.0232463	RAD51-AS1	processed_transcript
ENSG00000260917	332.732	-0.0561465	0.0218899	0.00447428	0.0233155	AL158212.3	sense_overlapping
ENSG00000233977	1.22094	-0.248509	0.142929	0.00447565	0.0233189	AC099681.3	lincRNA
ENSG00000212712	2.24261	-0.198032	0.105254	0.00447708	0.0233205	AP002414.1	processed_pseudogene
ENSG00000238962	4.96553	-0.198949	0.109827	0.00449166	0.0233805	RNU7-176P	snRNA
ENSG00000213600	11.7531	0.120833	0.0529949	0.00449296	0.0233808	U73169.1	sense_intronic
ENSG00000205930	47.1273	0.123563	0.054187	0.00449784	0.0233999	C21orf62-AS1	antisense
ENSG00000262583	13.1913	-0.0972628	0.0392757	0.00450097	0.0234097	TMEM231P1	transcribed_unprocessed_pseudogene
ENSG00000253569	1.03651	0.273485	0.174015	0.00450178	0.0234107	VENTXP5	processed_pseudogene
ENSG00000177133	1138.24	0.128691	0.0549555	0.00450274	0.0234125	LINC00982	antisense
ENSG00000279042	95.3525	-0.140681	0.0641544	0.00450596	0.0234165	AP005242.4	TEC
ENSG00000248522	32.4695	-0.179168	0.0909395	0.00450979	0.0234253	SBF1P1	processed_pseudogene
ENSG00000249150	1.17842	-0.235545	0.135919	0.00452878	0.0234997	AC010267.1	lincRNA
ENSG00000214354	0.503782	-0.448375	0.226714	0.00453159	0.0235079	AC133644.1	processed_pseudogene
ENSG00000237372	3.36344	0.246489	0.156264	0.0045332	0.02351	AL606807.1	lincRNA
ENSG00000272381	40.5741	0.161758	0.0795382	0.00453322	0.02351	LINC02664	lincRNA
ENSG00000274118	154.694	0.193297	0.103902	0.00453939	0.0235388	RF00019	misc_RNA
ENSG00000225093	5.95472	0.146061	0.0678401	0.00454281	0.0235495	RPL3P7	processed_pseudogene
ENSG00000277182	43.2481	-0.104885	0.0431119	0.00454297	0.0235495	AC006449.5	antisense
ENSG00000258987	3.9053	-0.206695	0.110925	0.00457853	0.0236965	AL132642.1	antisense
ENSG00000240898	9.59107	0.112825	0.0477657	0.00459286	0.0237442	AC132942.1	processed_pseudogene
ENSG00000269935	125.427	0.106242	0.0440419	0.00459681	0.0237588	AC092720.2	antisense
ENSG00000226622	2.02707	0.21672	0.126148	0.00460695	0.0237951	AC092155.1	antisense
ENSG00000228577	6.19062	-0.17865	0.0894211	0.0046167	0.0238345	AC010731.2	antisense
ENSG00000268067	3.40868	0.159127	0.0769793	0.00461709	0.0238345	OR5AH1P	transcribed_unprocessed_pseudogene
ENSG00000269463	12.6414	0.13101	0.0599601	0.00461992	0.0238459	AP001160.4	sense_intronic
ENSG00000279737	1.53135	0.237901	0.142811	0.00462978	0.0238838	AC112204.3	TEC
ENSG00000204055	27.5402	-0.106074	0.0442257	0.00463424	0.0239036	AL158151.1	antisense
ENSG00000275672	17.2657	0.156138	0.0768066	0.0046397	0.0239285	AC025580.3	antisense
ENSG00000229873	15.307	-0.14815	0.0691097	0.00464407	0.0239413	OGFR-AS1	antisense
ENSG00000232036	3.27842	-0.200369	0.108158	0.00465017	0.0239577	AL078645.2	processed_pseudogene
ENSG00000269933	2.57263	-0.225002	0.128244	0.00465406	0.0239701	AL031429.2	sense_intronic
ENSG00000279631	24.8231	-0.113665	0.0483789	0.00466612	0.0240192	AL158211.5	TEC
ENSG00000265148	19.0917	-0.10389	0.0426923	0.00466854	0.0240219	TSPOAP1-AS1	antisense
ENSG00000256377	7.40235	0.163753	0.0822892	0.00468606	0.0240889	AC009509.1	antisense
ENSG00000240940	1.11196	-0.239677	0.140352	0.00468932	0.0240963	RN7SL591P	misc_RNA
ENSG00000251292	8.70145	-0.198438	0.110465	0.00470061	0.0241477	ERVH-1	lincRNA
ENSG00000272143	54.4328	0.115185	0.0495267	0.00471279	0.0241972	FGF14-AS2	lincRNA
ENSG00000256654	56.6429	0.100694	0.0415871	0.00471399	0.0242001	AC005906.2	processed_transcript
ENSG00000202078	6.13073	0.145302	0.0686453	0.00472122	0.0242339	RF00019	misc_RNA
ENSG00000187953	214.457	-0.0769369	0.0298868	0.00472654	0.0242482	PMS2CL	transcribed_unprocessed_pseudogene
ENSG00000269836	39.5095	0.18746	0.100484	0.00473966	0.0243057	AC020913.3	antisense
ENSG00000237738	17.8815	0.191999	0.104797	0.00474859	0.0243437	RNF216-IT1	sense_intronic
ENSG00000259876	3.37357	0.19648	0.110316	0.00475616	0.0243739	AC010333.1	antisense
ENSG00000251250	0.619022	0.333153	0.259003	0.00475896	0.0243849	AC091951.3	transcribed_unprocessed_pseudogene
ENSG00000272161	16.7367	0.130718	0.059082	0.0047628	0.024398	AL589739.1	sense_intronic
ENSG00000213926	1.20383	-0.249338	0.151814	0.00476512	0.0244066	MSRB1P1	processed_pseudogene
ENSG00000167798	2.44846	-0.189086	0.10114	0.00477751	0.0244569	C3P1	transcribed_unprocessed_pseudogene
ENSG00000250116	13.1823	0.133757	0.0613056	0.00478331	0.0244702	AC018682.1	antisense
ENSG00000234840	2.74567	-0.201074	0.112635	0.0047844	0.0244714	LINC01239	lincRNA
ENSG00000280062	14.0123	0.155553	0.0769612	0.00480026	0.0245239	AL031719.1	TEC
ENSG00000250410	22.8666	0.127948	0.0581469	0.00480111	0.024525	AC112722.1	antisense
ENSG00000270580	98.2242	0.106328	0.0447701	0.0048064	0.0245388	AC139256.2	processed_transcript
ENSG00000243220	0.491929	0.365331	0.240006	0.00481742	0.0245786	AC006159.2	antisense
ENSG00000248978	5.73542	-0.194664	0.104138	0.00482405	0.0246025	AC009901.1	unprocessed_pseudogene
ENSG00000279605	3.62962	0.168037	0.0858121	0.00484631	0.0247028	AC067930.5	TEC
ENSG00000235131	0.555534	0.330534	0.239458	0.0048564	0.0247509	AL136528.2	antisense
ENSG00000259319	76.5525	-0.112016	0.0471055	0.00486148	0.0247702	AF111167.2	antisense
ENSG00000237505	6.20733	-0.134314	0.061884	0.00489188	0.0248951	PKN2-AS1	antisense
ENSG00000265527	8.03341	0.211616	0.124756	0.00489857	0.0249258	MIR5690	miRNA
ENSG00000261757	3.79228	-0.176227	0.0902794	0.00490241	0.024942	AC005592.1	lincRNA
ENSG00000276952	21.7417	-0.113137	0.048032	0.00490453	0.0249494	AL121772.3	antisense
ENSG00000279179	57.0618	0.125685	0.0559806	0.00490945	0.0249678	AL662907.2	TEC
ENSG00000241673	1.67355	-0.212034	0.123491	0.00491196	0.024968	RPS27P12	processed_pseudogene
ENSG00000259403	1.75715	-0.212284	0.119805	0.00491053	0.024968	AC020704.1	lincRNA
ENSG00000280439	40.9498	0.112229	0.0481398	0.00491595	0.0249775	AC004836.1	TEC
ENSG00000223536	1.072	-0.278294	0.174611	0.00494667	0.0251202	AC008164.1	lincRNA
ENSG00000226875	1.30042	0.247082	0.159763	0.00496477	0.0251861	ZNF877P	unprocessed_pseudogene
ENSG00000254454	43.3219	0.195412	0.108658	0.00497298	0.0252033	RCC2P6	processed_pseudogene
ENSG00000178631	3.43577	-0.175926	0.0905558	0.00498541	0.0252596	ACTG1P1	processed_pseudogene
ENSG00000269814	57.0429	0.125948	0.0565981	0.0049892	0.0252754	AC008403.4	lincRNA
ENSG00000226942	8.24829	-0.152878	0.0741034	0.00499512	0.0253021	IL9RP3	unprocessed_pseudogene
ENSG00000278934	6.44172	-0.142658	0.0664165	0.0049985	0.0253125	AC117489.1	TEC
ENSG00000224680	4.48444	-0.156925	0.0756072	0.00500026	0.0253153	PLA2G12AP1	processed_pseudogene
ENSG00000231889	193.096	0.0472177	0.0173466	0.00500086	0.0253153	TRAF3IP2-AS1	antisense
ENSG00000263396	1.2421	-0.248684	0.157578	0.00500106	0.0253153	AP005119.1	processed_pseudogene
ENSG00000237476	50.5446	-0.118759	0.0519069	0.005014	0.0253774	LINC01637	lincRNA
ENSG00000179141	9.17617	-0.157936	0.0766638	0.00501615	0.0253821	MTUS2-AS1	antisense
ENSG00000231754	6.64334	-0.166286	0.0818987	0.00501693	0.0253821	AL512380.1	lincRNA
ENSG00000281026	93.3245	0.0831447	0.033013	0.0050169	0.0253821	N4BP2L2-IT2	sense_intronic
ENSG00000241231	39.3357	0.171845	0.0881712	0.00501974	0.0253925	AC022294.1	lincRNA
ENSG00000246334	41.2369	0.0865346	0.0357204	0.0050288	0.0254287	PRR7-AS1	antisense
ENSG00000251189	2.55335	-0.225766	0.132452	0.00503837	0.0254703	AC010425.1	lincRNA
ENSG00000231177	21.7056	-0.0887867	0.0355981	0.00504444	0.0254874	LINC00852	antisense
ENSG00000210049	24.2775	0.189971	0.105084	0.00509055	0.0256809	MT-TF	Mt_tRNA
ENSG00000249092	1.21341	0.225384	0.136092	0.00509734	0.0257103	PPIAP77	processed_pseudogene
ENSG00000242337	25.4148	-0.100498	0.0413462	0.00510319	0.0257296	INHCAP	transcribed_unprocessed_pseudogene
ENSG00000270988	5.57263	0.161511	0.0800384	0.00510481	0.0257343	AC019257.2	lincRNA
ENSG00000242294	215.528	-0.100967	0.0420515	0.00511292	0.0257548	STAG3L5P	transcribed_unprocessed_pseudogene
ENSG00000234084	33.6713	-0.146398	0.0694107	0.00511451	0.0257594	AL049552.1	antisense
ENSG00000179743	165.94	0.0745141	0.0290183	0.00511895	0.025767	AL450998.2	antisense
ENSG00000272264	1.75271	0.206907	0.12067	0.00511843	0.025767	AC009686.2	lincRNA
ENSG00000233028	1.69368	-0.221116	0.129327	0.00512537	0.0257936	AC006970.2	processed_pseudogene
ENSG00000258181	5.04124	-0.170656	0.0891241	0.00515274	0.0259108	AC008083.2	lincRNA
ENSG00000225399	23.805	0.188295	0.104333	0.00515784	0.0259227	AC121247.1	lincRNA
ENSG00000215493	25.8638	-0.116907	0.0509189	0.00517568	0.0259886	AC007731.1	processed_pseudogene
ENSG00000282882	1.49797	0.228295	0.144467	0.00520281	0.0261039	AC027045.2	lincRNA
ENSG00000276248	64.7335	-0.090468	0.0364527	0.00523543	0.0262231	AL442125.1	sense_intronic
ENSG00000239129	1.60704	0.235982	0.156432	0.00525882	0.026319	RF01210	snoRNA
ENSG00000261068	4.4404	0.185603	0.104883	0.00528054	0.0263965	AL512274.1	lincRNA
ENSG00000199245	0.640951	-0.360624	0.248493	0.00528338	0.0264037	RF00019	misc_RNA
ENSG00000273986	0.72181	0.0967102	0.186787	0.00528771	0.0264115	RF00017	misc_RNA
ENSG00000278231	2.91449	0.174986	0.0921027	0.00528735	0.0264115	AL133342.1	lincRNA
ENSG00000279128	2.82631	-0.225512	0.132613	0.0052917	0.0264245	AC078925.2	TEC
ENSG00000275162	8.34845	0.164431	0.0861339	0.00529543	0.0264396	AC005391.1	sense_intronic
ENSG00000260285	81.791	0.0734534	0.0285975	0.00530467	0.0264754	AL133367.1	antisense
ENSG00000258303	1.92857	0.21317	0.12985	0.00531972	0.0265261	AC012464.2	sense_intronic
ENSG00000267496	2.20613	-0.209502	0.120485	0.00534341	0.0266268	FAM215A	lincRNA
ENSG00000260305	3.57488	0.184762	0.102844	0.0053471	0.0266398	NTRK3-AS1	lincRNA
ENSG00000267074	5.90822	0.203906	0.120261	0.00534919	0.0266398	AC015911.3	sense_intronic
ENSG00000270140	1.80798	0.197562	0.112295	0.00534951	0.0266398	AC005520.3	sense_intronic
ENSG00000223390	1.68714	-0.198259	0.11043	0.0053601	0.026689	AL445685.1	antisense
ENSG00000269293	312.657	0.0723592	0.0278919	0.00536828	0.0267157	ZSCAN16-AS1	antisense
ENSG00000207630	3.44309	-0.189668	0.103215	0.00537828	0.026762	MIR7-3	miRNA
ENSG00000230102	12.3842	-0.13308	0.0619922	0.00538261	0.0267766	LINC02028	processed_transcript
ENSG00000258672	4.54864	-0.15561	0.0779579	0.00538962	0.0268009	AL160313.2	lincRNA
ENSG00000210082	2.44146e+06	0.156528	0.0783807	0.00539044	0.0268015	MT-RNR2	Mt_rRNA
ENSG00000214106	73.6634	0.118909	0.052437	0.00541601	0.0269216	PAXIP1-AS2	antisense
ENSG00000233900	8.27154	-0.15705	0.0779688	0.00541728	0.0269218	RPL17P35	processed_pseudogene
ENSG00000252751	6.34717	0.144586	0.0699037	0.00541746	0.0269218	RNU6-143P	snRNA
ENSG00000265194	8.39333	0.13155	0.0625069	0.00542656	0.02696	AL359922.2	antisense
ENSG00000236908	7.04665	-0.146227	0.0699929	0.0054476	0.0270468	AC005865.1	lincRNA
ENSG00000243101	3.48051	0.177676	0.0966916	0.00545295	0.0270698	RPS3P7	processed_pseudogene
ENSG00000273058	21.3178	0.10345	0.0446295	0.00545484	0.0270757	AL359921.2	antisense
ENSG00000229847	2000.67	0.123419	0.0533573	0.0054598	0.0270968	EMX2OS	antisense
ENSG00000261829	250.57	0.114321	0.0505551	0.00547184	0.0271365	AC009407.1	sense_overlapping
ENSG00000238140	7.34578	0.19342	0.114477	0.00547383	0.0271416	AC104170.2	antisense
ENSG00000249330	2.55128	-0.178587	0.0950579	0.00547618	0.0271462	AC095060.1	bidirectional_promoter_lncRNA
ENSG00000232956	230.926	-0.0655714	0.0251656	0.00548209	0.0271719	SNHG15	lincRNA
ENSG00000279355	191.832	0.136277	0.0630346	0.00552842	0.027366	AGPAT4-IT1	TEC
ENSG00000255389	151.127	0.110599	0.0475866	0.00554304	0.027424	Z97989.1	antisense
ENSG00000179967	42.3528	0.151213	0.0758122	0.00555935	0.0274976	PPP1R14BP3	processed_pseudogene
ENSG00000230319	42.5526	-0.088676	0.0366902	0.00556504	0.027515	AL022476.1	antisense
ENSG00000231428	4.71609	0.237148	0.164499	0.00557128	0.0275341	LINC00396	lincRNA
ENSG00000266680	4.0252	-0.165949	0.0845845	0.005571	0.0275341	AL135905.1	antisense
ENSG00000268660	27.9434	-0.113007	0.0494346	0.0055773	0.0275542	LETM1P2	processed_pseudogene
ENSG00000273076	8.00627	0.137533	0.0659464	0.00558082	0.0275644	AL021707.7	antisense
ENSG00000206627	10.7458	0.222271	0.144154	0.00558344	0.0275738	RNU6-969P	snRNA
ENSG00000260459	2.97881	0.193959	0.112473	0.00559184	0.0276117	FTLP14	processed_pseudogene
ENSG00000274742	6.08427	0.213406	0.135465	0.00559809	0.0276261	RF00017	misc_RNA
ENSG00000272046	1.87559	-0.235484	0.146504	0.00559981	0.0276295	AL445647.1	lincRNA
ENSG00000244459	5.86694	0.167226	0.089406	0.00561258	0.0276782	AC147067.1	lincRNA
ENSG00000223502	2.51735	-0.215681	0.134953	0.00561384	0.0276807	AL731537.1	antisense
ENSG00000231971	7.32814	0.149565	0.0754167	0.00561455	0.0276807	AL078590.2	lincRNA
ENSG00000270127	80.2452	0.139575	0.0665814	0.00563872	0.0277747	AC027020.2	lincRNA
ENSG00000205763	613.195	0.104423	0.0446487	0.00564168	0.0277856	RP9P	transcribed_unprocessed_pseudogene
ENSG00000202441	4.35412	0.142256	0.0687903	0.00565247	0.0278316	RNY4P10	misc_RNA
ENSG00000227395	1.1007	-0.26827	0.17896	0.00565972	0.0278565	EIF2AP4	processed_pseudogene
ENSG00000272861	10.2845	0.13708	0.0658863	0.0056838	0.0279425	AC012360.2	lincRNA
ENSG00000242793	1.85051	-0.210147	0.129144	0.00568964	0.0279676	AC135999.1	processed_pseudogene
ENSG00000240731	141.239	0.0223216	0.0278156	0.00569319	0.0279814	AL139287.1	sense_intronic
ENSG00000271386	1.07555	0.26645	0.223224	0.00569892	0.028006	SRGNP1	processed_pseudogene
ENSG00000188185	189.213	-0.0817002	0.0351954	0.005701	0.0280106	LINC00265	lincRNA
ENSG00000273189	2.28495	0.196523	0.115212	0.00570185	0.0280106	AC010619.2	processed_transcript
ENSG00000226239	42.201	0.111746	0.0493123	0.00570497	0.0280181	AL031658.1	antisense
ENSG00000275374	4.26031	-0.152213	0.0766408	0.00570508	0.0280181	AC113385.3	unprocessed_pseudogene
ENSG00000233221	22.5047	0.142875	0.0701109	0.00571132	0.0280392	AC133785.1	antisense
ENSG00000271660	1.682	0.231772	0.148146	0.00571158	0.0280392	Z99497.2	processed_pseudogene
ENSG00000279887	12.8863	0.182784	0.103151	0.00572597	0.0280917	AC046158.4	TEC
ENSG00000223845	0.997975	-0.272243	0.184364	0.00573716	0.028143	VN1R40P	unitary_pseudogene
ENSG00000242330	2.98144	-0.179552	0.097212	0.00574128	0.0281523	RN7SL683P	misc_RNA
ENSG00000213713	90.5634	-0.117041	0.0520906	0.00574265	0.0281554	PIGCP1	processed_pseudogene
ENSG00000269940	3.34275	0.200967	0.116852	0.00575982	0.0282251	AL049840.3	sense_intronic
ENSG00000274010	6.02378	0.146494	0.0734388	0.00577006	0.0282627	AC006011.2	processed_pseudogene
ENSG00000265421	2.03734	0.266408	0.221251	0.0057856	0.0283199	AC016601.1	miRNA
ENSG00000271538	15.2332	-0.156625	0.0796331	0.00578587	0.0283199	LINC02427	lincRNA
ENSG00000255337	14.4487	0.13494	0.0647831	0.00580349	0.0283915	AP001830.1	antisense
ENSG00000228153	19.6755	0.153982	0.0787171	0.00581037	0.0284106	AL161793.1	lincRNA
ENSG00000266983	18.558	0.109712	0.0490348	0.00581961	0.0284452	AC011444.1	antisense
ENSG00000274712	277.548	0.0629879	0.0252734	0.00581827	0.0284452	AC005332.4	lincRNA
ENSG00000206791	2.1405	-0.191654	0.107272	0.00583075	0.0284809	RNU1-129P	snRNA
ENSG00000264592	0.529072	0.364882	0.34138	0.0058329	0.0284827	RN7SL131P	misc_RNA
ENSG00000228624	65.0591	0.0981112	0.0412199	0.00585502	0.0285701	HDAC2-AS2	antisense
ENSG00000230018	2.51997	0.212158	0.13111	0.0058571	0.0285766	PPIAP39	processed_pseudogene
ENSG00000266710	2.76419	0.234158	0.169189	0.00586072	0.028587	RN7SL48P	misc_RNA
ENSG00000228113	13.591	0.149997	0.0757681	0.00586421	0.0285967	AC003991.1	antisense
ENSG00000271803	1.80443	-0.196081	0.111997	0.00586787	0.0286035	AL121906.1	antisense
ENSG00000263680	12.0963	0.155491	0.0794223	0.0058955	0.0286886	AC007639.1	lincRNA
ENSG00000280395	0.803152	-0.330559	0.223939	0.00589602	0.0286886	AL034546.1	sense_overlapping
ENSG00000248546	6.47565	0.183052	0.107235	0.00589822	0.0286927	ANP32C	processed_pseudogene
ENSG00000261087	808.752	0.0813906	0.033614	0.00590695	0.0287314	AP003469.4	lincRNA
ENSG00000229255	2.14531	-0.228661	0.139604	0.00591308	0.0287539	AC138089.1	lincRNA
ENSG00000224289	2.48224	0.21409	0.138067	0.00591766	0.0287549	IFIT6P	unprocessed_pseudogene
[truncated: 630 more rows]

## Sheet: Neuron IFNB vs CTRL
ensembl_gene_id	baseMean	log2FoldChange	lfcSE	pvalue	padj	external_gene_name	gene_biotype
ENSG00000206337	1857.77	3.60756	0.144412	2.38181e-138	1.27584e-135	HCP5	sense_overlapping
ENSG00000197536	1333.24	2.78672	0.143692	1.13574e-84	3.87947e-82	C5orf56	processed_transcript
ENSG00000230389	535.909	3.74424	0.336154	1.78346e-30	3.85636e-28	HCP5	processed_transcript
ENSG00000274956	8250.48	-0.670181	0.0648702	1.05755e-25	2.09458e-23	NKAIN3-IT1	lincRNA
ENSG00000229023	91.9962	3.82804	0.39062	6.26154e-24	1.19015e-21	AC067945.1	processed_pseudogene
ENSG00000238015	118.883	3.0912	0.356667	3.40298e-19	5.64822e-17	AC104837.2	processed_pseudogene
ENSG00000265326	187.566	2.66299	0.340302	2.20011e-16	3.36717e-14	RF00017	misc_RNA
ENSG00000225101	76.719	5.18662	0.752583	3.1252e-12	3.89724e-10	OR52K3P	transcribed_unprocessed_pseudogene
ENSG00000245556	139.032	1.63893	0.268129	5.48625e-11	6.27696e-09	SCAMP1-AS1	lincRNA
ENSG00000282331	50.9536	-0.0169893	0.25972	2.32578e-10	2.51451e-08	LRRC37A4P	transcribed_unprocessed_pseudogene
ENSG00000225492	1110.77	5.96791	0.925166	7.62295e-10	7.84565e-08	GBP1P1	transcribed_unprocessed_pseudogene
ENSG00000280007	399.164	0.824587	0.145969	1.54688e-09	1.53833e-07	AC008079.1	antisense
ENSG00000277511	41.5697	2.41042	0.443193	4.04362e-09	3.85846e-07	AC116407.2	lincRNA
ENSG00000250846	78.0724	-2.22886	0.42052	5.4758e-09	5.18309e-07	EPHA5-AS1	lincRNA
ENSG00000233089	42.7478	5.79328	0.993723	8.68616e-09	7.99704e-07	PSMB8-AS1	processed_transcript
ENSG00000263731	304.146	-0.723792	0.136795	1.40894e-08	1.25785e-06	AC145207.5	lincRNA
ENSG00000250011	18.3843	7.83202	2.32447	1.73067e-08	1.53347e-06	HMGB1P3	processed_pseudogene
ENSG00000273270	1061.83	-0.340049	0.0646217	5.0638e-08	4.21727e-06	AC090114.2	lincRNA
ENSG00000232381	23.8093	3.50465	0.700352	5.78419e-08	4.80027e-06	OR52U1P	unprocessed_pseudogene
ENSG00000259291	718.004	-0.558131	0.113474	1.37378e-07	1.0829e-05	ZNF710-AS1	antisense
ENSG00000229847	1398.86	-0.439836	0.0878014	1.41725e-07	1.10606e-05	EMX2OS	antisense
ENSG00000227028	53.8519	3.31943	0.711494	2.01807e-07	1.52448e-05	SLC8A1-AS1	antisense
ENSG00000233975	12.0205	4.76677	0.996988	2.45216e-07	1.80646e-05	LINC02574	lincRNA
ENSG00000271522	27.3455	3.00374	0.666824	2.61877e-07	1.91089e-05	AC016831.6	lincRNA
ENSG00000225964	21.0041	3.60792	0.858893	9.85888e-07	6.63897e-05	NRIR	antisense
ENSG00000181109	25.1856	2.93174	0.688907	1.10214e-06	7.30972e-05	OR52P1P	unprocessed_pseudogene
ENSG00000274307	86.3337	1.90008	0.448841	1.1432e-06	7.54737e-05	AC023449.2	sense_intronic
ENSG00000279400	4460.6	0.460416	0.10296	1.74997e-06	0.000110874	AC008957.3	TEC
ENSG00000259976	3642.92	-0.688946	0.167207	4.32838e-06	0.000261578	AC093010.3	3prime_overlapping_ncRNA
ENSG00000258441	3373.29	-0.304162	0.0710129	8.24003e-06	0.000472529	LINC00641	processed_transcript
ENSG00000243650	6.17982	6.04374	2.30339	8.74528e-06	0.000496668	RN7SL834P	misc_RNA
ENSG00000281965	479.792	0.530146	0.130403	8.86615e-06	0.000502323	AC243791.2	transcribed_unprocessed_pseudogene
ENSG00000233030	51.6929	1.73634	0.463958	1.00375e-05	0.000563272	AC243772.2	antisense
ENSG00000256262	66.9554	5.07787	2.00644	1.41457e-05	0.000768202	USP30-AS1	antisense
ENSG00000280441	413.986	1.27255	0.364378	2.55873e-05	0.00129353	FP236383.1	lincRNA
ENSG00000175061	2653.16	-0.474716	0.124335	2.84608e-05	0.00142117	SNHG29	processed_transcript
ENSG00000260032	23667.1	-0.256276	0.0639173	3.41615e-05	0.0016774	NORAD	lincRNA
ENSG00000204789	449.044	0.469343	0.126365	4.50408e-05	0.00209776	ZNF204P	processed_pseudogene
ENSG00000226025	1468.62	0.181812	0.365967	5.46545e-05	0.00246333	AC005515.1	transcribed_unprocessed_pseudogene
ENSG00000255036	312.545	0.764221	0.225022	6.09272e-05	0.00269924	STRA6LP	processed_transcript
ENSG00000237105	62.9667	0.155631	0.335477	6.30464e-05	0.00277228	HCP5	processed_transcript
ENSG00000235505	43.5691	3.49489	1.05375	7.99345e-05	0.00338122	CASP17P	transcribed_unprocessed_pseudogene
ENSG00000205837	18.4103	2.33753	0.761095	8.67676e-05	0.00363237	LINC00487	lincRNA
ENSG00000277053	8348.01	-0.350812	0.0956404	8.88652e-05	0.00370231	GTF2IP1	transcribed_unprocessed_pseudogene
ENSG00000272512	46.3149	1.14601	0.368057	9.13774e-05	0.00379168	AL645608.7	lincRNA
ENSG00000232229	212.709	0.597996	0.175101	9.27831e-05	0.0038365	LINC00865	lincRNA
ENSG00000271646	123.902	0.784733	0.248947	0.000133279	0.00526541	AC099343.3	bidirectional_promoter_lncRNA
ENSG00000249494	24.8066	-1.80454	0.630896	0.000145956	0.00571436	AC008629.1	antisense
ENSG00000262410	83.6885	0.792623	0.256761	0.00016603	0.00634223	AC024361.1	sense_intronic
ENSG00000266378	11.4076	3.72099	1.13858	0.000194455	0.0072052	AC005224.3	lincRNA
ENSG00000220323	342.07	0.511659	0.160748	0.000251321	0.00881456	HIST2H2BD	transcribed_unprocessed_pseudogene
ENSG00000227666	12.7987	-2.32146	0.786777	0.00025969	0.00904463	CYCSP24	processed_pseudogene
ENSG00000229816	193.858	0.599771	0.197293	0.000302188	0.0102733	DDX50P1	processed_pseudogene
ENSG00000234290	72.0083	1.23326	0.456739	0.000308915	0.0104515	AC116366.1	antisense
ENSG00000282851	62.5422	1.15931	0.428659	0.000329601	0.0110346	BISPR	lincRNA
ENSG00000260213	12.2738	3.28131	1.29652	0.000379261	0.0124496	AC092718.2	antisense
ENSG00000228526	482.534	0.401447	0.127013	0.000436137	0.0140166	MIR34AHG	lincRNA
ENSG00000267886	116.115	-0.566358	0.196476	0.000539387	0.0166398	AC074135.1	lincRNA
ENSG00000264176	8.22399	2.47258	0.944418	0.000561562	0.0172561	MAGOH2P	transcribed_processed_pseudogene
ENSG00000260081	77.1661	1.12565	0.45869	0.000638033	0.019143	AF274858.1	transcribed_processed_pseudogene
ENSG00000240342	1097.42	-0.506927	0.174852	0.00063974	0.0191589	RPS2P5	processed_pseudogene
ENSG00000267321	113.376	-0.258629	0.508949	0.000740921	0.0217198	LINC02001	lincRNA
ENSG00000225855	55.7436	0.879911	0.348238	0.000750805	0.0218872	RUSC1-AS1	antisense
ENSG00000231185	45.0082	1.61216	0.71852	0.00080555	0.0231537	SPRY4-AS1	antisense
ENSG00000249859	128.092	0.844552	0.346682	0.000952965	0.0267386	PVT1	lincRNA
ENSG00000282681	10.4081	3.12048	1.446	0.000960094	0.0268537	LY6E-DT	lincRNA
ENSG00000261315	86.5118	-0.678651	0.266062	0.00106307	0.0292023	LARP4P	transcribed_processed_pseudogene
ENSG00000226950	643.447	-0.436312	0.154488	0.00114014	0.0309229	DANCR	processed_transcript
ENSG00000124549	188.373	0.585075	0.226189	0.00122136	0.0325267	BTN2A3P	transcribed_unprocessed_pseudogene
ENSG00000285744	385.433	0.537742	0.209647	0.00121889	0.0325267	AC083837.1	bidirectional_promoter_lncRNA
ENSG00000246662	16.0142	-2.22142	1.08895	0.00126687	0.0335117	LINC00535	antisense
ENSG00000267102	31.1768	1.48554	0.718873	0.00132506	0.0347777	AC060766.1	transcribed_processed_pseudogene
ENSG00000233452	6.30722	-0.170348	0.34884	0.00138267	0.0359297	STXBP5-AS1	antisense
ENSG00000225051	7.70698	0.0581073	0.268494	0.00142415	0.036684	HMGB3P22	transcribed_processed_pseudogene
ENSG00000232097	17.8508	1.72022	0.865678	0.00146399	0.0371819	AC079781.3	processed_pseudogene
ENSG00000186056	30.7751	1.31404	0.645125	0.00152026	0.0380375	MATN1-AS1	antisense
ENSG00000233646	6.75406	0.162688	0.339104	0.00152448	0.0380621	OR52T1P	unprocessed_pseudogene
ENSG00000196295	3753.24	0.22253	0.0739457	0.00157738	0.0390109	GARS-DT	processed_transcript
ENSG00000237852	5.2508	-0.172551	0.347935	0.00157384	0.0390109	AC119800.1	sense_intronic
ENSG00000132967	332.872	-0.574243	0.230609	0.00166376	0.0408045	HMGB1P5	transcribed_processed_pseudogene
ENSG00000261644	25.6449	1.63398	0.847541	0.00168105	0.0409767	AC007728.2	antisense
ENSG00000225377	125.569	0.662481	0.277653	0.0016927	0.0409986	NRSN2-AS1	antisense
ENSG00000238045	68.2684	1.14369	0.571948	0.00169375	0.0409986	AC009133.1	antisense
ENSG00000285799	63.877	-0.640458	0.264808	0.00169429	0.0409986	AL645929.3	transcribed_unprocessed_pseudogene
ENSG00000269560	13.3254	-1.56421	0.761124	0.00171971	0.0414437	AC010422.4	sense_intronic
ENSG00000124835	12.1561	1.77391	0.921684	0.0017351	0.041729	AC105760.1	antisense
ENSG00000185904	14.6186	-0.0934445	0.283819	0.00176865	0.0422344	LINC00839	lincRNA
ENSG00000233237	1222.45	-0.327259	0.116701	0.00184544	0.043626	LINC00472	lincRNA
ENSG00000248553	7.63118	0.279313	0.559858	0.00186379	0.0439716	OR52H2P	unitary_pseudogene
ENSG00000251348	137.215	-0.479138	0.188183	0.00194878	0.0455663	HSPD1P11	processed_pseudogene
ENSG00000278771	3582.67	0.564048	0.23319	0.00199552	0.0463748	RN7SL3	misc_RNA
ENSG00000245571	131.828	1.04425	0.535479	0.00202902	0.0468383	FAM111A-DT	lincRNA
ENSG00000255182	69.6549	-1.02817	0.523772	0.00208169	0.0477269	AC084125.2	processed_transcript
ENSG00000189238	15.9986	-0.202531	0.390336	0.00216123	0.0490261	LINC00943	lincRNA
ENSG00000247317	30.3571	1.19463	0.633191	0.00219245	0.0495434	LY6E-DT	lincRNA

## Sheet: Neuron IFNG vs CTRL
ensembl_gene_id	baseMean	log2FoldChange	lfcSE	pvalue	padj	external_gene_name	gene_biotype
ENSG00000206337	1857.77	4.82475	0.143072	2.51571e-249	1.56033e-246	HCP5	sense_overlapping
ENSG00000197536	1333.24	2.98946	0.143135	1.21613e-97	2.98573e-95	C5orf56	processed_transcript
ENSG00000285744	385.433	3.28938	0.179442	3.35061e-76	6.86699e-74	AC083837.1	bidirectional_promoter_lncRNA
ENSG00000254838	145.352	3.95026	0.254539	1.49215e-55	2.5301e-53	GVINP1	transcribed_unprocessed_pseudogene
ENSG00000230389	535.909	4.61352	0.333632	2.618e-45	3.76242e-43	HCP5	processed_transcript
ENSG00000204789	449.044	1.60783	0.119096	1.54675e-42	2.08317e-40	ZNF204P	processed_pseudogene
ENSG00000280441	413.986	4.45644	0.334351	5.37901e-42	7.16259e-40	FP236383.1	lincRNA
ENSG00000225492	1110.77	12.3115	0.94712	2.15357e-34	2.30716e-32	GBP1P1	transcribed_unprocessed_pseudogene
ENSG00000229023	91.9962	4.13655	0.386997	6.89011e-28	6.01455e-26	AC067945.1	processed_pseudogene
ENSG00000234290	72.0083	4.06691	0.388735	3.27866e-27	2.79981e-25	AC116366.1	antisense
ENSG00000261618	475.011	1.52446	0.155306	7.69315e-24	5.70188e-22	LINC02605	lincRNA
ENSG00000234518	68.3456	7.49669	0.755559	8.31989e-23	5.92421e-21	PTGES3P1	processed_pseudogene
ENSG00000225101	76.719	7.35078	0.74716	1.43061e-22	9.97576e-21	OR52K3P	transcribed_unprocessed_pseudogene
ENSG00000283674	2046.48	0.820076	0.0855806	2.00829e-22	1.39216e-20	AC068587.4	processed_transcript
ENSG00000226025	1468.62	15.6339	2.7761	2.33878e-21	1.55714e-19	AC005515.1	transcribed_unprocessed_pseudogene
ENSG00000268088	122.236	12.7116	3.08731	5.13904e-21	3.3367e-19	AC093063.1	transcribed_unprocessed_pseudogene
ENSG00000274956	8250.48	-0.581324	0.064383	7.53921e-20	4.56791e-18	NKAIN3-IT1	lincRNA
ENSG00000259834	292.634	1.40739	0.159846	1.13877e-19	6.79488e-18	AL365361.1	lincRNA
ENSG00000224083	66.8827	2.27253	0.262836	4.19601e-19	2.43586e-17	MTCO1P11	unprocessed_pseudogene
ENSG00000271646	123.902	1.87601	0.22875	1.38886e-17	7.33945e-16	AC099343.3	bidirectional_promoter_lncRNA
ENSG00000256262	66.9554	10.684	2.33989	2.71928e-17	1.40859e-15	USP30-AS1	antisense
ENSG00000227028	53.8519	5.51199	0.677738	5.31596e-17	2.72967e-15	SLC8A1-AS1	antisense
ENSG00000261971	259.463	1.40494	0.177916	2.66169e-16	1.32349e-14	MMP25-AS1	antisense
ENSG00000203709	715.326	1.28014	0.165996	1.24561e-15	5.91891e-14	MIR29B2CHG	lincRNA
ENSG00000238015	118.883	2.61569	0.358442	2.38126e-14	1.04126e-12	AC104837.2	processed_pseudogene
ENSG00000283235	43.7548	5.38824	0.737703	2.54706e-14	1.10964e-12	AC139493.2	processed_transcript
ENSG00000245532	37909.9	0.846294	0.114586	3.42566e-14	1.47335e-12	NEAT1	lincRNA
ENSG00000235505	43.5691	7.19458	0.986317	1.28407e-13	5.27253e-12	CASP17P	transcribed_unprocessed_pseudogene
ENSG00000279400	4460.6	0.735632	0.10223	1.61213e-13	6.56238e-12	AC008957.3	TEC
ENSG00000231721	800.945	0.956333	0.135837	2.65493e-13	1.06058e-11	LINC-PINT	processed_transcript
ENSG00000269460	26.2516	10.1183	2.81679	3.54225e-13	1.40788e-11	AC005515.2	lincRNA
ENSG00000214548	14267.1	0.727421	0.106835	1.12124e-12	4.21476e-11	MEG3	lincRNA
ENSG00000180139	43.1303	3.21177	0.487936	2.90814e-12	1.04965e-10	ACTA2-AS1	antisense
ENSG00000242808	2381.01	0.525818	0.0776173	5.26951e-12	1.85924e-10	SOX2-OT	sense_overlapping
ENSG00000270069	350.786	0.945544	0.143011	6.46974e-12	2.26239e-10	MIR222HG	lincRNA
ENSG00000274307	86.3337	2.62047	0.432034	8.49634e-11	2.65232e-09	AC023449.2	sense_intronic
ENSG00000181109	25.1856	3.89808	0.66278	2.61084e-10	7.72082e-09	OR52P1P	unprocessed_pseudogene
ENSG00000281197	19.6464	8.62461	2.39273	4.77775e-10	1.37158e-08	TNFRSF14-AS1	antisense
ENSG00000277511	41.5697	2.53985	0.436742	5.40853e-10	1.53583e-08	AC116407.2	lincRNA
ENSG00000233089	42.7478	6.29494	0.993858	5.41521e-10	1.53587e-08	PSMB8-AS1	processed_transcript
ENSG00000279277	230.685	1.16109	0.199366	6.98645e-10	1.95562e-08	AC012020.1	processed_transcript
ENSG00000251441	47.4599	2.90673	0.51575	7.92002e-10	2.20908e-08	RTEL1P1	transcribed_processed_pseudogene
ENSG00000214106	135.697	2.5564	0.447833	8.0391e-10	2.23964e-08	PAXIP1-AS2	antisense
ENSG00000274565	29.3552	2.63528	0.474604	1.43915e-09	3.90325e-08	AC080038.2	antisense
ENSG00000260664	1422.22	-0.372744	0.0622571	1.48678e-09	4.02317e-08	AC004158.1	lincRNA
ENSG00000223823	25.2968	4.25455	0.752127	1.65949e-09	4.43454e-08	LINC01342	lincRNA
ENSG00000236254	42.3626	2.2908	0.414217	2.00309e-09	5.32252e-08	MTND4P14	unprocessed_pseudogene
ENSG00000159860	29.762	9.47331	2.67907	2.52899e-09	6.65244e-08	TCAF2P1	transcribed_unprocessed_pseudogene
ENSG00000237272	19.0615	5.13556	0.888082	3.37649e-09	8.6689e-08	OR51R1P	unitary_pseudogene
ENSG00000232381	23.8093	3.79057	0.690393	5.0093e-09	1.26272e-07	OR52U1P	unprocessed_pseudogene
ENSG00000263731	304.146	-0.744999	0.133055	5.12434e-09	1.28944e-07	AC145207.5	lincRNA
ENSG00000228863	119.177	1.31085	0.243007	5.21979e-09	1.31157e-07	AL121985.1	antisense
ENSG00000226380	522.949	1.7852	0.332677	5.33608e-09	1.33652e-07	AC016831.1	lincRNA
ENSG00000238045	68.2684	2.56836	0.488681	7.53905e-09	1.85284e-07	AC009133.1	antisense
ENSG00000214552	64.1489	1.70828	0.322723	8.17041e-09	1.99553e-07	COPS8P2	processed_pseudogene
ENSG00000272463	21.0354	6.90217	1.33263	9.71866e-09	2.34932e-07	AL357054.4	lincRNA
ENSG00000240393	112.194	1.18705	0.22225	9.99882e-09	2.41457e-07	AC092691.2	processed_pseudogene
ENSG00000271204	235.597	0.899204	0.167432	1.56683e-08	3.73015e-07	AC016831.5	lincRNA
ENSG00000229950	18.2759	4.72303	0.914417	1.82865e-08	4.33161e-07	TFAP2A-AS1	antisense
ENSG00000239268	204.576	1.09919	0.210594	2.14909e-08	5.03499e-07	AC092691.1	lincRNA
ENSG00000258441	3373.29	-0.38946	0.0707508	2.29327e-08	5.35148e-07	LINC00641	processed_transcript
ENSG00000250011	18.3843	7.73998	2.32463	2.47718e-08	5.76924e-07	HMGB1P3	processed_pseudogene
ENSG00000272941	16.6338	8.40844	2.5082	3.26727e-08	7.5128e-07	AC083862.2	antisense
ENSG00000124549	188.373	1.10068	0.214794	4.02438e-08	9.13783e-07	BTN2A3P	transcribed_unprocessed_pseudogene
ENSG00000285277	216.52	5.1899	1.07028	4.16857e-08	9.4561e-07	AC254813.2	transcribed_unprocessed_pseudogene
ENSG00000180385	231.099	-1.37416	0.2781	6.06419e-08	1.34943e-06	EMC3-AS1	transcribed_unprocessed_pseudogene
ENSG00000186369	942.264	-0.685731	0.133523	7.12996e-08	1.57199e-06	LINC00643	transcribed_unitary_pseudogene
ENSG00000243175	100.602	1.18348	0.241484	1.10154e-07	2.36235e-06	RPSAP36	transcribed_processed_pseudogene
ENSG00000216775	459.835	-0.663621	0.132277	1.43539e-07	3.03144e-06	AL109918.1	transcribed_unprocessed_pseudogene
ENSG00000253882	90.2972	4.81972	1.06449	2.12793e-07	4.36874e-06	AC099548.2	transcribed_unprocessed_pseudogene
ENSG00000272894	96.9989	2.04031	0.443342	2.26747e-07	4.63906e-06	AC004982.2	lincRNA
ENSG00000203930	21438.8	0.299413	0.0590342	2.92742e-07	5.88706e-06	LINC00632	antisense
ENSG00000235653	14.2206	5.4625	1.09636	3.49784e-07	6.95115e-06	AC007253.1	processed_pseudogene
ENSG00000237105	62.9667	6.53895	1.42762	3.52412e-07	6.99157e-06	HCP5	processed_transcript
ENSG00000245571	131.828	2.07791	0.467292	4.39448e-07	8.59531e-06	FAM111A-DT	lincRNA
ENSG00000235917	27.7221	2.55192	0.570057	5.04542e-07	9.82772e-06	MTCO2P11	unprocessed_pseudogene
ENSG00000285468	66.1752	1.93218	0.434013	5.20675e-07	1.01252e-05	EPHA1-AS1	antisense
ENSG00000245556	139.032	1.22329	0.269401	5.75365e-07	1.11245e-05	SCAMP1-AS1	lincRNA
ENSG00000180867	465.137	0.627504	0.132321	6.55064e-07	1.25115e-05	PDIA3P1	transcribed_processed_pseudogene
ENSG00000271522	27.3455	2.87559	0.663385	7.17417e-07	1.36032e-05	AC016831.6	lincRNA
ENSG00000254017	22.9708	2.71814	0.628586	7.808e-07	1.47576e-05	IGHEP2	IG_C_pseudogene
ENSG00000236567	28.1412	2.01639	0.458006	8.25823e-07	1.5571e-05	TCF3P1	processed_pseudogene
ENSG00000099251	132.538	0.899396	0.197145	8.55724e-07	1.60706e-05	HSD17B7P2	transcribed_unprocessed_pseudogene
ENSG00000267745	39.0476	2.19787	0.505525	9.3469e-07	1.74562e-05	AC060766.7	processed_transcript
ENSG00000250899	68.6232	1.20656	0.274382	1.10968e-06	2.04779e-05	AC125807.2	lincRNA
ENSG00000276107	19.4369	-3.07993	0.701586	1.19378e-06	2.17773e-05	AC037198.1	sense_intronic
ENSG00000284602	221.851	0.712703	0.158279	1.62484e-06	2.90781e-05	AL031432.4	bidirectional_promoter_lncRNA
ENSG00000270231	916.631	-0.488314	0.107074	1.97209e-06	3.4635e-05	NBPF8	transcribed_unprocessed_pseudogene
ENSG00000230699	212.935	-0.928393	0.213183	1.97664e-06	3.4689e-05	AL645608.2	lincRNA
ENSG00000228166	37.9738	1.57536	0.376223	2.05348e-06	3.59573e-05	MTND1P11	unprocessed_pseudogene
ENSG00000270426	58.6153	1.53714	0.366319	2.07991e-06	3.6393e-05	AC099343.2	sense_intronic
ENSG00000260231	78.8919	1.48425	0.357142	2.45967e-06	4.26892e-05	KDM7A-DT	bidirectional_promoter_lncRNA
ENSG00000237711	35.6694	2.2102	0.542268	2.5853e-06	4.47049e-05	MTCO3P11	unprocessed_pseudogene
ENSG00000284920	24.9394	2.27636	0.567535	3.25868e-06	5.53341e-05	RPS3AP34	processed_pseudogene
ENSG00000260920	691.142	-0.384053	0.0859032	4.79521e-06	7.93668e-05	AL031985.3	sense_overlapping
ENSG00000203799	34.9862	2.70562	0.704056	5.48682e-06	8.96802e-05	CCDC162P	transcribed_unitary_pseudogene
ENSG00000285081	69.7009	1.11528	0.2747	5.79486e-06	9.38311e-05	AC004593.2	sense_intronic
ENSG00000278910	12.1599	7.80449	2.81116	6.35868e-06	0.00010209	BANCR	lincRNA
ENSG00000231185	45.0082	2.43931	0.643563	7.197e-06	0.000114458	SPRY4-AS1	antisense
ENSG00000243753	82.5498	2.59135	0.705418	9.83272e-06	0.000152566	HLA-L	transcribed_unprocessed_pseudogene
ENSG00000250846	78.0724	-1.56022	0.41104	1.00491e-05	0.000155615	EPHA5-AS1	lincRNA
ENSG00000272631	287.895	0.533855	0.127167	1.22766e-05	0.000188132	AC067750.1	antisense
ENSG00000276672	282.364	-0.613223	0.149946	1.40781e-05	0.000213106	AL161891.1	sense_intronic
ENSG00000279355	1582.41	0.406241	0.098056	1.96531e-05	0.000288242	AGPAT4-IT1	TEC
ENSG00000225964	21.0041	3.05013	0.874128	1.9674e-05	0.000288369	NRIR	antisense
ENSG00000261644	25.6449	2.5939	0.728529	2.03026e-05	0.000296476	AC007728.2	antisense
ENSG00000240498	422.812	0.752605	0.19443	2.37234e-05	0.000341354	CDKN2B-AS1	antisense
ENSG00000274718	28.0045	-1.57307	0.436774	2.50225e-05	0.000357644	AL136964.1	lincRNA
ENSG00000163597	1858.93	-0.321782	0.0785009	2.81516e-05	0.000397546	SNHG16	processed_transcript
ENSG00000282164	446.677	-0.560598	0.142437	2.81395e-05	0.000397546	PEG13	sense_intronic
ENSG00000266378	11.4076	4.31619	1.10869	2.85665e-05	0.000402681	AC005224.3	lincRNA
ENSG00000177234	176.587	-0.845743	0.225122	2.96959e-05	0.000417106	LINC01561	lincRNA
ENSG00000181908	25.4551	1.83178	0.523249	3.01427e-05	0.000423129	AP003774.1	lincRNA
ENSG00000213468	44.5463	1.15826	0.319639	3.06428e-05	0.000429893	FIRRE	processed_transcript
ENSG00000251562	1.63126e+06	0.342256	0.0840094	3.09816e-05	0.000434387	MALAT1	lincRNA
ENSG00000279249	44.9041	-2.06463	0.602325	3.22247e-05	0.000450477	AC007614.1	antisense
ENSG00000276718	18.6995	2.32523	0.675103	3.29976e-05	0.000459103	AC005840.4	antisense
ENSG00000250320	35.4517	-4.03071	1.22906	4.0286e-05	0.00054821	AC113383.1	antisense
ENSG00000285106	394.848	0.677421	0.179624	4.25054e-05	0.000573775	AC016831.7	lincRNA
ENSG00000224666	5.45294	5.9368	2.46213	4.56071e-05	0.000609707	Z84484.1	antisense
ENSG00000243650	6.17982	5.38449	2.2771	4.6307e-05	0.000618012	RN7SL834P	misc_RNA
ENSG00000233030	51.6929	1.58049	0.461409	4.64202e-05	0.000619173	AC243772.2	antisense
ENSG00000226314	229.792	0.675952	0.182228	5.57042e-05	0.00073305	ZNF192P1	transcribed_unprocessed_pseudogene
ENSG00000285298	17.8341	2.65926	0.831219	5.9695e-05	0.000779474	AL136295.13	lincRNA
ENSG00000267702	676.83	-0.601402	0.162339	6.93669e-05	0.000892417	AP005131.6	sense_intronic
ENSG00000284606	215.498	0.59342	0.161477	7.54095e-05	0.000964366	AC105233.5	processed_transcript
ENSG00000247828	758.546	0.584603	0.158835	8.24305e-05	0.00104564	TMEM161B-AS1	antisense
ENSG00000237505	90.3507	1.30252	0.397609	8.49402e-05	0.00107343	PKN2-AS1	antisense
ENSG00000267056	11.009	-3.09115	0.932285	8.566e-05	0.00108137	AC005336.1	processed_pseudogene
ENSG00000189332	664.943	-0.332516	0.086937	8.86439e-05	0.00111427	AC090099.1	transcribed_unprocessed_pseudogene
ENSG00000240445	1575.55	-0.254395	0.0659029	9.61599e-05	0.00119978	FOXO3B	processed_pseudogene
ENSG00000260260	90.0442	-0.784891	0.226015	0.000103165	0.00127839	SNHG19	lincRNA
ENSG00000248553	7.63118	4.70919	1.50385	0.000103483	0.00128098	OR52H2P	unitary_pseudogene
ENSG00000281954	13.9101	0.0348599	0.418251	0.000112093	0.00137314	AC208069.1	antisense
ENSG00000285667	56.4682	1.116	0.342495	0.000113018	0.0013826	AC012291.2	lincRNA
ENSG00000276412	10.542	3.59635	1.14573	0.000115891	0.00141452	AL591926.2	lincRNA
ENSG00000264462	5446.14	-0.552773	0.154357	0.00012941	0.00156253	MIR3648-2	miRNA
ENSG00000214783	233.11	0.787693	0.232291	0.00013708	0.0016467	POLR2J4	processed_transcript
ENSG00000275620	39.5631	-1.09277	0.339621	0.000141389	0.00169415	AL121827.2	antisense
ENSG00000228288	33.1523	-1.78338	0.593183	0.000159562	0.00188602	PCAT6	antisense
ENSG00000261451	1356.75	-0.430124	0.11975	0.000170189	0.00199797	AC104964.3	sense_overlapping
ENSG00000232973	502.468	0.421744	0.117177	0.000185361	0.00215635	CYP1B1-AS1	antisense
ENSG00000255874	52.0514	1.1836	0.382436	0.000187704	0.00218038	LINC00346	lincRNA
ENSG00000267302	5.71041	4.94543	2.34979	0.000191847	0.00222194	RNFT1-DT	lincRNA
ENSG00000285550	6.39986	5.65647	2.64463	0.000204441	0.00234704	AC110014.1	lincRNA
ENSG00000202198	36.0565	0.0264204	0.417308	0.000215497	0.00245246	RF00100	misc_RNA
ENSG00000273189	5.06785	4.4871	1.62961	0.000224997	0.00254582	AC010619.2	processed_transcript
ENSG00000281026	964.042	0.401138	0.113503	0.000228082	0.00257578	N4BP2L2-IT2	sense_intronic
ENSG00000265478	147.441	0.663039	0.199537	0.000232352	0.00261774	AC107982.3	lincRNA
ENSG00000253919	23.5159	1.54849	0.532858	0.000259894	0.00289345	THAP12P7	processed_pseudogene
ENSG00000225746	357.378	0.739328	0.230169	0.00028535	0.00314566	MEG8	lincRNA
ENSG00000263745	9.48515	3.81999	1.38243	0.00029071	0.00319876	AP005230.1	lincRNA
ENSG00000214174	656.882	0.443186	0.128634	0.000299034	0.00327811	AMZ2P1	transcribed_unprocessed_pseudogene
ENSG00000189238	15.9986	-3.08112	1.19501	0.000316074	0.00344249	LINC00943	lincRNA
ENSG00000248596	51.6477	4.64672	1.94663	0.000340469	0.00367087	AC139491.2	processed_transcript
ENSG00000228223	962.204	0.33952	0.0978342	0.000345543	0.00372046	HCG11	lincRNA
ENSG00000225151	4780.02	-0.323863	0.0928139	0.000345762	0.00372113	GOLGA2P7	transcribed_unprocessed_pseudogene
ENSG00000234377	15.4116	3.58385	1.42549	0.000349889	0.00376382	RNF219-AS1	antisense
ENSG00000255182	69.6549	-1.34209	0.478938	0.000357471	0.00383139	AC084125.2	processed_transcript
ENSG00000233975	12.0205	3.00217	1.0525	0.000363712	0.00388767	LINC02574	lincRNA
ENSG00000237065	77.3499	0.750969	0.240025	0.000367525	0.00392132	NANOGP4	transcribed_processed_pseudogene
ENSG00000248697	9.80904	2.99694	1.14685	0.000377389	0.00400842	TOX4P1	processed_pseudogene
ENSG00000246223	198.068	0.66496	0.208903	0.00038127	0.00404053	LINC01550	lincRNA
ENSG00000227533	43.9231	1.34163	0.489939	0.000420984	0.00439813	SLC2A1-AS1	lincRNA
ENSG00000233725	6.3364	0.262106	0.550426	0.000456397	0.00471997	LINC00284	lincRNA
ENSG00000278291	193.73	-0.488415	0.149697	0.000479512	0.0049309	AL161772.1	antisense
ENSG00000237550	386.422	-0.681902	0.220879	0.000486493	0.00499614	RPL9P9	transcribed_processed_pseudogene
ENSG00000273893	152.017	-0.570787	0.179199	0.000486317	0.00499614	AL133520.1	sense_intronic
ENSG00000273598	254.729	-0.606549	0.193086	0.000489923	0.00502431	AC211486.3	unprocessed_pseudogene
ENSG00000265179	177.838	0.74522	0.246152	0.000514509	0.00525183	AP000894.2	processed_transcript
ENSG00000213363	19.9097	-1.52966	0.570529	0.000524231	0.00532799	RPS3P6	processed_pseudogene
ENSG00000261292	62.5828	-1.06479	0.382684	0.000557127	0.00561151	AC110491.1	lincRNA
ENSG00000229816	193.858	0.590655	0.18894	0.000564507	0.00568098	DDX50P1	processed_pseudogene
ENSG00000242094	42.2757	1.13831	0.415294	0.000565064	0.00568416	FOXP1-IT1	sense_intronic
ENSG00000266405	57.9443	0.771274	0.260465	0.000591641	0.00590614	AP005061.1	transcribed_processed_pseudogene
ENSG00000273287	40.5036	-1.08421	0.397556	0.000659972	0.0064731	AL008718.2	lincRNA
ENSG00000280007	399.164	0.455309	0.142682	0.000684226	0.00667765	AC008079.1	antisense
ENSG00000227733	477.064	0.464227	0.145905	0.000687583	0.00670763	AC239809.3	lincRNA
ENSG00000234741	2640.49	-0.276483	0.0838323	0.000739832	0.00714928	GAS5	processed_transcript
ENSG00000225377	125.569	0.761201	0.261913	0.000740192	0.00714983	NRSN2-AS1	antisense
ENSG00000229847	1398.86	-0.280385	0.0853375	0.000775917	0.00745721	EMX2OS	antisense
ENSG00000273270	1061.83	-0.205742	0.0624769	0.000796696	0.00761758	AC090114.2	lincRNA
ENSG00000261069	1741.83	0.29437	0.0901891	0.000804629	0.00768408	AC124312.3	lincRNA
ENSG00000256663	77.1904	-0.777282	0.271947	0.00080578	0.00769195	AC112777.1	processed_pseudogene
ENSG00000261087	617.297	-0.350211	0.109393	0.000896642	0.00843295	AP003469.4	lincRNA
ENSG00000273301	60.8186	0.947761	0.353801	0.000909161	0.00854387	AC016717.2	lincRNA
ENSG00000196295	3753.24	0.237534	0.0739582	0.000983396	0.00915028	GARS-DT	processed_transcript
ENSG00000286116	21.2798	1.50957	0.641401	0.00101245	0.00938354	AL157394.2	antisense
ENSG00000196756	109.128	-0.889445	0.331181	0.00101967	0.00943936	SNHG17	processed_transcript
ENSG00000282393	726.106	-0.316977	0.100187	0.0010516	0.00969343	AC016588.2	lincRNA
ENSG00000259639	12.8838	-1.6994	0.71356	0.00105328	0.00970475	AC021351.1	lincRNA
ENSG00000225569	12.0179	-2.03251	0.885472	0.00105796	0.00974024	CCT4P2	processed_pseudogene
ENSG00000251136	315.694	0.602571	0.207127	0.00109051	0.0100009	AF117829.1	lincRNA
ENSG00000265992	225.536	0.505482	0.168396	0.00113004	0.0102993	ESRG	sense_intronic
ENSG00000284624	1260.63	0.392442	0.126586	0.00114027	0.0103845	AC092902.4	processed_transcript
ENSG00000254377	718.607	-0.538217	0.1835	0.00114245	0.0103963	MIR124-2HG	lincRNA
ENSG00000284734	594.443	0.395629	0.128497	0.00114944	0.0104397	AC099063.4	antisense
ENSG00000233806	29.806	-1.26481	0.517923	0.00117583	0.0106344	LINC01237	processed_transcript
ENSG00000264860	24.6407	1.25707	0.519098	0.00118361	0.0106965	AC097641.1	processed_transcript
ENSG00000228526	482.534	0.382131	0.123773	0.00120149	0.0108331	MIR34AHG	lincRNA
ENSG00000232774	2523.53	0.279026	0.089395	0.00130308	0.0116246	AL355916.1	lincRNA
ENSG00000284859	2965.09	-0.325345	0.105557	0.0013551	0.0120295	LINC00599	lincRNA
ENSG00000265326	187.566	0.912042	0.357927	0.00136881	0.0121421	RF00017	misc_RNA
ENSG00000236871	23.1059	-1.16476	0.482335	0.00140757	0.0124437	LINC00106	lincRNA
ENSG00000226071	4.85499	5.62342	3.43521	0.00141743	0.0125168	HLA-DPB2	transcribed_unprocessed_pseudogene
ENSG00000273656	2844.98	-0.350299	0.114651	0.00141699	0.0125168	AC139494.1	transcribed_unprocessed_pseudogene
ENSG00000284620	144.707	1.14784	0.482793	0.00143294	0.0126301	AF228730.5	transcribed_unprocessed_pseudogene
ENSG00000276975	2247.88	0.366584	0.121394	0.00143444	0.0126386	HYDIN2	transcribed_unprocessed_pseudogene
ENSG00000229222	54.9438	0.831005	0.319968	0.00148021	0.0129659	KRT18P4	processed_pseudogene
ENSG00000267102	31.1768	1.49949	0.681379	0.00148038	0.0129659	AC060766.1	transcribed_processed_pseudogene
ENSG00000277053	8348.01	-0.291538	0.0942929	0.00150827	0.0131612	GTF2IP1	transcribed_unprocessed_pseudogene
ENSG00000229031	6.00192	2.27827	1.03449	0.00158658	0.0137277	MTCO1P25	unprocessed_pseudogene
ENSG00000256982	94.2929	-0.786662	0.301537	0.00159252	0.0137639	AC135782.1	lincRNA
ENSG00000255545	252.069	0.53456	0.1879	0.00161241	0.0139204	AP004608.1	processed_transcript
ENSG00000286215	247.575	0.62617	0.226701	0.00166572	0.014301	AL356534.1	transcribed_processed_pseudogene
ENSG00000276386	59.4142	0.718276	0.270778	0.00171645	0.0146842	CNTNAP3P2	unprocessed_pseudogene
ENSG00000266208	24.6642	-1.20892	0.533068	0.00176425	0.0150366	AC080112.1	antisense
ENSG00000230225	32.0904	1.23961	0.549901	0.00178338	0.0151421	MTND5P14	unprocessed_pseudogene
ENSG00000244041	133.279	0.537665	0.191572	0.00179889	0.0152621	LINC01011	lincRNA
ENSG00000183935	60.9359	-0.849532	0.338209	0.00184251	0.0155538	HTR7P1	transcribed_processed_pseudogene
ENSG00000243915	386.459	-0.374512	0.126774	0.00185294	0.0156275	THAP12P2	processed_pseudogene
ENSG00000286072	440.811	0.36823	0.12437	0.00185946	0.0156436	AC002072.1	lincRNA
ENSG00000213433	15.358	1.6545	0.809734	0.00189258	0.0158741	RPLP1P6	transcribed_processed_pseudogene
ENSG00000261220	33.6556	-1.04786	0.446929	0.00189415	0.0158817	AC103706.1	lincRNA
ENSG00000124224	334.876	0.688598	0.261789	0.00193359	0.0161663	PPP4R1L	transcribed_unprocessed_pseudogene
ENSG00000232489	30.9947	1.17143	0.523301	0.00198936	0.0165544	MFAP1P1	processed_pseudogene
ENSG00000273847	1088.43	-0.245622	0.0813931	0.00207817	0.0171663	AC139494.2	lincRNA
ENSG00000260918	264.682	0.429413	0.149395	0.00208196	0.0171873	AC107398.3	sense_overlapping
ENSG00000264176	8.22399	2.06788	0.974651	0.00210121	0.0173025	MAGOH2P	transcribed_processed_pseudogene
ENSG00000229994	67.8771	0.785276	0.313178	0.00211199	0.0173743	RPL5P4	processed_pseudogene
ENSG00000235834	12.5294	1.53992	0.753777	0.00213175	0.0175125	Z93022.1	sense_intronic
ENSG00000275512	1854.2	0.336823	0.114537	0.00213137	0.0175125	AC007998.4	lincRNA
ENSG00000280011	22.0673	1.43147	0.704819	0.00214449	0.0175865	AL031595.2	antisense
ENSG00000285351	16.3093	3.08384	2.19874	0.00220205	0.0179818	TCAF2P1	transcribed_unprocessed_pseudogene
ENSG00000261242	16.1211	1.37962	0.65508	0.00220997	0.0180293	AL136038.3	antisense
ENSG00000227730	28.6983	1.1313	0.512509	0.00226006	0.0183998	MTND6P5	unprocessed_pseudogene
ENSG00000272668	47.1152	0.826268	0.336289	0.00226498	0.0184271	AL590560.2	antisense
ENSG00000225177	67.0191	-0.780586	0.314242	0.00226835	0.0184418	AL590617.2	antisense
ENSG00000225783	18034.7	-0.215308	0.0719586	0.002288	0.0185798	MIAT	lincRNA
ENSG00000254708	67.8147	0.865062	0.361781	0.00228884	0.0185798	AL139174.1	processed_pseudogene
ENSG00000213071	51.939	-0.93216	0.397271	0.00229483	0.0186121	LPAL2	transcribed_unprocessed_pseudogene
ENSG00000241956	25.333	1.63144	0.852579	0.00233925	0.0189138	AC109466.1	antisense
ENSG00000261520	46.5468	2.23436	1.32139	0.00235076	0.0189874	DLGAP1-AS5	antisense
ENSG00000270048	30.7839	-0.965856	0.42026	0.00239248	0.0192715	AC068790.4	sense_intronic
ENSG00000237321	48.0667	-0.866925	0.366069	0.00241577	0.0194127	AL354936.1	sense_intronic
ENSG00000226950	643.447	-0.421734	0.149233	0.00242477	0.0194783	DANCR	processed_transcript
ENSG00000240739	5.09459	-3.13412	1.68165	0.00244588	0.0196278	AC006511.1	unprocessed_pseudogene
ENSG00000267454	128.342	0.493636	0.179417	0.0024618	0.0197421	ZNF582-AS1	lincRNA
ENSG00000258033	34.0493	0.805649	0.331407	0.00251228	0.0200923	AC063947.2	unprocessed_pseudogene
ENSG00000215840	6.22611	2.06886	1.0891	0.00257482	0.0205715	AL592295.1	processed_pseudogene
ENSG00000238113	60.6128	-1.75463	0.999735	0.00259833	0.0207242	LINC01410	lincRNA
ENSG00000273797	25.3999	1.28922	0.639154	0.00262347	0.0209035	AL133445.2	sense_intronic
ENSG00000229589	139.06	0.541937	0.200685	0.00266834	0.0211966	ACVR2B-AS1	antisense
ENSG00000211751	6.13533	-0.255504	0.538752	0.00268826	0.0213261	TRBC1	TR_C_gene
ENSG00000239653	176.336	0.451331	0.16373	0.00277006	0.0218646	PSMD6-AS2	antisense
ENSG00000228878	104.974	0.793632	0.332215	0.00279082	0.0219916	SEPT7-AS1	lincRNA
ENSG00000250111	25.3362	0.079509	0.427397	0.00282953	0.0222297	AC107982.1	unprocessed_pseudogene
ENSG00000242337	79.4858	0.706349	0.286507	0.00292332	0.0228372	INHCAP	transcribed_unprocessed_pseudogene
ENSG00000157306	592.169	0.338831	0.120104	0.00293658	0.0229332	ZFHX2-AS1	processed_transcript
ENSG00000285392	564.538	-0.420729	0.152681	0.00303263	0.0235972	AC270276.3	lincRNA
ENSG00000276449	311.638	-0.386933	0.139365	0.00305194	0.0237302	AC004076.2	antisense
ENSG00000267322	926.032	0.510308	0.192375	0.0031488	0.0244045	SNHG22	antisense
ENSG00000232097	17.8508	1.54003	0.849706	0.0031771	0.0245673	AC079781.3	processed_pseudogene
ENSG00000111788	129.019	-0.486558	0.18278	0.00317817	0.0245675	AC009533.1	unprocessed_pseudogene
ENSG00000223891	86.9118	-1.08413	0.535096	0.00321693	0.0248264	OSER1-DT	lincRNA
ENSG00000284727	111.943	0.646269	0.259601	0.00322603	0.0248885	AC116562.4	transcribed_unprocessed_pseudogene
ENSG00000224142	6.2582	2.53713	1.62076	0.00331114	0.0253789	AMMECR1-IT1	sense_intronic
ENSG00000260949	124.22	-0.564602	0.220269	0.00335127	0.0256518	AP006545.1	sense_overlapping
ENSG00000224029	10.0278	1.39182	0.736156	0.00337221	0.0257884	AL450344.1	sense_intronic
ENSG00000261342	85.308	-0.574866	0.22506	0.00340066	0.0259783	AC006538.1	sense_intronic
ENSG00000272108	217.599	-0.393775	0.145138	0.00350079	0.0266333	AC244517.1	lincRNA
ENSG00000237248	50.2023	-1.49324	0.899703	0.0035935	0.027172	LINC00987	lincRNA
ENSG00000215039	358.714	0.637483	0.260681	0.00360854	0.027242	CD27-AS1	processed_transcript
ENSG00000267629	14.3084	-0.169278	0.468346	0.00364074	0.0274587	AC138430.1	processed_transcript
ENSG00000228918	11.2211	2.08139	1.54601	0.0037375	0.0280539	LINC01344	lincRNA
ENSG00000259088	7.86357	1.6132	0.925367	0.00374919	0.0281327	AL137779.2	antisense
ENSG00000238105	310.092	0.425854	0.158959	0.00375931	0.0281817	GOLGA2P5	transcribed_unprocessed_pseudogene
ENSG00000229534	8.56746	2.12158	1.38158	0.00387745	0.0288987	HNRNPA1P53	processed_pseudogene
ENSG00000255893	12.1577	-1.53471	0.841983	0.00390585	0.0290767	AP000786.1	antisense
ENSG00000257497	96.2063	-0.666533	0.279604	0.00394672	0.0293037	AC121761.1	antisense
ENSG00000245651	24.5676	1.44113	0.83308	0.00395811	0.0293638	AC083805.1	lincRNA
ENSG00000179253	9.01606	2.01362	1.42903	0.00396962	0.0294399	AL162457.1	antisense
ENSG00000260213	12.2738	2.17816	1.54239	0.00403066	0.0298082	AC092718.2	antisense
ENSG00000227827	42.6418	-1.10581	0.572318	0.00406711	0.0300154	AC138969.2	unprocessed_pseudogene
ENSG00000262410	83.6885	0.599501	0.243154	0.00420499	0.030865	AC024361.1	sense_intronic
ENSG00000273987	25.6834	0.983299	0.487603	0.00432452	0.0315458	AC121761.2	sense_intronic
ENSG00000228490	6.08997	2.65253	1.49217	0.00433843	0.0316277	CT009496.1	unprocessed_pseudogene
ENSG00000268747	7.88567	-1.56968	0.981104	0.00457535	0.0330179	AC022432.1	processed_pseudogene
ENSG00000182484	2106.82	-0.280492	0.102984	0.00458843	0.033092	WASH6P	transcribed_unprocessed_pseudogene
ENSG00000272505	356.656	-0.494059	0.195307	0.00462926	0.0333355	AC104964.4	lincRNA
ENSG00000163016	252.705	0.415782	0.158735	0.00464153	0.0333932	ALMS1P1	transcribed_unprocessed_pseudogene
ENSG00000273674	22.6324	1.09555	0.573853	0.00464488	0.0334071	AC021752.1	lincRNA
ENSG00000267769	4.71601	-0.457928	0.903712	0.00470706	0.0337643	AC011498.6	antisense
ENSG00000255036	312.545	0.529654	0.213841	0.00471275	0.0337782	STRA6LP	processed_transcript
ENSG00000106133	178.216	-0.52749	0.213462	0.00477739	0.034131	NSUN5P2	transcribed_unprocessed_pseudogene
ENSG00000286147	11308.5	0.195214	0.0693525	0.00477883	0.034131	AC092445.1	lincRNA
ENSG00000249348	4835.37	0.234263	0.0850805	0.00483244	0.0344721	UGDH-AS1	antisense
ENSG00000272419	78.3899	0.863424	0.416453	0.00484513	0.0345514	LINC01145	transcribed_unprocessed_pseudogene
ENSG00000273192	36.9964	-0.925657	0.455905	0.0048834	0.034783	AL671710.1	lincRNA
ENSG00000247853	13.8889	1.13587	0.620889	0.00492728	0.035032	AC006064.2	antisense
ENSG00000257275	4.66379	0.278959	0.561342	0.0051786	0.036598	AL139020.2	antisense
ENSG00000278666	334.02	-0.415802	0.161574	0.00518495	0.036621	AC106795.4	transcribed_unprocessed_pseudogene
ENSG00000165511	148.631	0.48785	0.19921	0.00530577	0.0373847	C10orf25	antisense
ENSG00000237807	49.1436	0.0554501	0.421561	0.00538745	0.0378357	AC022034.1	lincRNA
ENSG00000274449	284.884	-0.333829	0.125622	0.00548349	0.0383844	AC008463.2	lincRNA
ENSG00000235618	35.5265	0.928696	0.479829	0.0055962	0.0390237	FAM21EP	transcribed_unprocessed_pseudogene
ENSG00000272070	419.361	0.548748	0.228784	0.00560296	0.0390237	AC005618.1	lincRNA
ENSG00000238741	3881.02	0.467772	0.187454	0.00561186	0.0390635	SCARNA7	scaRNA
ENSG00000234841	145.645	0.639439	0.282805	0.00564695	0.039272	AC017007.2	processed_pseudogene
ENSG00000224536	5.20154	-0.370626	0.68082	0.00565598	0.0393233	AC096677.1	antisense
ENSG00000272944	52.8786	0.699367	0.321116	0.00579573	0.0401204	AC079834.2	antisense
ENSG00000232855	51.1426	0.758324	0.35895	0.00581316	0.0402025	AF165147.1	lincRNA
ENSG00000240024	142.411	-0.406454	0.159668	0.00581713	0.0402183	LINC00888	transcribed_unprocessed_pseudogene
ENSG00000234456	1287.64	0.357583	0.136361	0.00582786	0.0402492	MAGI2-AS3	processed_transcript
ENSG00000226833	11.5258	-1.82723	1.42219	0.00584095	0.0403035	AC092164.1	antisense
ENSG00000268751	14.7651	-1.21639	0.721005	0.00583805	0.0403035	SCGB1B2P	lincRNA
ENSG00000260630	247.078	0.625754	0.270954	0.00587295	0.0404617	SNAI3-AS1	antisense
ENSG00000272655	201.26	0.769806	0.367479	0.00588226	0.040511	POLR2J4	transcribed_unprocessed_pseudogene
ENSG00000214796	73.027	-0.75993	0.362161	0.00592854	0.0407494	AC098934.1	transcribed_unprocessed_pseudogene
ENSG00000235217	769.852	-0.261748	0.0983185	0.00602051	0.0412493	TSPY26P	transcribed_processed_pseudogene
ENSG00000230082	12.0769	1.263	0.758384	0.00609221	0.0416316	PRRT3-AS1	antisense
ENSG00000258256	6.64134	1.84024	1.3765	0.00610812	0.0417161	AC011773.3	antisense
ENSG00000285967	2531.11	0.159391	0.0588433	0.00613245	0.0418338	NIPBL-DT	bidirectional_promoter_lncRNA
ENSG00000225937	40.4992	0.950305	0.511757	0.0061829	0.0420927	PCA3	antisense
ENSG00000236963	47.388	-1.4872	1.26349	0.00623775	0.0423926	LINC01141	lincRNA
ENSG00000282598	7.50512	0.174739	0.470282	0.00625256	0.042481	AC138374.2	antisense
ENSG00000242615	351.558	0.316062	0.120981	0.00626718	0.0425313	AC022415.1	transcribed_processed_pseudogene
ENSG00000173862	13.139	1.22267	0.775292	0.00634251	0.0429282	AC008080.1	lincRNA
ENSG00000260032	23667.1	-0.171828	0.0637083	0.00634688	0.0429282	NORAD	lincRNA
ENSG00000205861	5.84905	0.219894	0.502105	0.00643322	0.0433665	PCOTH	processed_transcript
ENSG00000255571	600.167	-0.439299	0.177994	0.00643972	0.0433899	MIR9-3HG	lincRNA
ENSG00000231064	232.446	0.474927	0.193896	0.00650335	0.0437186	AC234582.1	antisense
ENSG00000274210	14.7972	1.08144	0.629675	0.00652832	0.0438365	RF00003	snRNA
ENSG00000176716	7.34626	-1.73076	1.44339	0.00654984	0.0439434	OR10AB1P	transcribed_unprocessed_pseudogene
ENSG00000249494	24.8066	-1.03552	0.606776	0.00655739	0.0439599	AC008629.1	antisense
ENSG00000231189	24.8259	-0.899485	0.476535	0.00669541	0.0447291	AC013448.1	lincRNA
ENSG00000244378	21.1175	1.06009	0.644139	0.00671687	0.0448491	RPS2P45	transcribed_processed_pseudogene
ENSG00000259924	121.497	0.564696	0.245296	0.00673383	0.0449121	AC011939.1	processed_pseudogene
ENSG00000260070	33.6609	-0.938412	0.514012	0.00673425	0.0449121	AC006960.3	antisense
ENSG00000233009	7.72096	1.8102	1.81925	0.00677091	0.0451056	NALCN-AS1	antisense
ENSG00000267248	52.2654	0.831382	0.425616	0.00676733	0.0451056	AC025048.2	processed_transcript
ENSG00000285184	305.074	0.28804	0.110618	0.00682284	0.0453309	AC244033.2	bidirectional_promoter_lncRNA
ENSG00000230581	20.5442	-1.10744	0.670712	0.00684195	0.0454376	ACTG1P14	processed_pseudogene
ENSG00000266947	69.7707	0.73968	0.359816	0.0069982	0.0462796	AC022916.1	antisense
ENSG00000249790	202.675	0.483597	0.20239	0.00703488	0.0464554	AC092490.1	lincRNA
ENSG00000225840	16.7496	1.12164	0.689587	0.00712799	0.0469089	AC010970.1	processed_pseudogene
ENSG00000268713	6.67469	0.0973615	0.432968	0.00716024	0.0470476	AC005261.3	lincRNA
ENSG00000283050	1197.68	0.285416	0.111733	0.00720181	0.0472695	GTF2IP12	transcribed_unprocessed_pseudogene
ENSG00000285918	10.9062	-1.41894	0.987351	0.00722626	0.0473889	AC092376.3	antisense
ENSG00000225206	1824.02	-0.235544	0.0899347	0.00726169	0.0475947	MIR137HG	lincRNA
ENSG00000285856	4.66448	2.33633	1.8652	0.00731404	0.047805	AL353704.1	antisense
ENSG00000286110	16.5744	-1.30316	0.960318	0.00738238	0.0481981	AC090983.2	processed_transcript
ENSG00000250461	288.576	-0.460499	0.193346	0.00758438	0.0492984	AC122718.1	processed_pseudogene
ENSG00000229677	15.2694	1.3665	1.15361	0.00762118	0.0494967	AC018644.1	processed_pseudogene

## Sheet: Neuron TNFA vs CTRL
ensembl_gene_id	baseMean	log2FoldChange	lfcSE	pvalue	padj	external_gene_name	gene_biotype
ENSG00000206337	1857.77	3.18263	0.143852	3.63745e-109	1.82406e-106	HCP5	sense_overlapping
ENSG00000285744	385.433	3.49813	0.177565	6.73066e-88	2.83277e-85	AC083837.1	bidirectional_promoter_lncRNA
ENSG00000230389	535.909	3.83215	0.334439	4.46637e-32	5.98113e-30	HCP5	processed_transcript
ENSG00000274956	8250.48	-0.692538	0.0642774	8.96389e-28	1.01572e-25	NKAIN3-IT1	lincRNA
ENSG00000261618	475.011	1.50362	0.154049	1.02303e-23	9.88184e-22	LINC02605	lincRNA
ENSG00000197536	1333.24	1.23839	0.145466	1.66157e-18	1.2238e-16	C5orf56	processed_transcript
ENSG00000271811	126.106	1.6388	0.220816	7.44816e-15	4.4218e-13	Z97200.1	lincRNA
ENSG00000280441	413.986	2.43989	0.340177	3.33449e-14	1.90384e-12	FP236383.1	lincRNA
ENSG00000265326	187.566	2.30922	0.340103	5.22331e-13	2.68795e-11	RF00017	misc_RNA
ENSG00000225492	1110.77	6.81648	0.923673	3.03793e-12	1.45235e-10	GBP1P1	transcribed_unprocessed_pseudogene
ENSG00000256262	66.9554	8.1235	2.18185	5.61488e-11	2.40613e-09	USP30-AS1	antisense
ENSG00000177822	43.5572	3.27471	0.547508	1.07437e-10	4.45808e-09	TENM3-AS1	antisense
ENSG00000256637	1175.83	0.594164	0.0990697	4.18559e-10	1.63058e-08	LINC01965	lincRNA
ENSG00000267745	39.0476	2.82349	0.487886	4.75613e-10	1.84674e-08	AC060766.7	processed_transcript
ENSG00000245532	37909.9	0.676628	0.114964	6.97753e-10	2.66106e-08	NEAT1	lincRNA
ENSG00000233089	42.7478	5.95243	0.990608	3.37564e-09	1.19102e-07	PSMB8-AS1	processed_transcript
ENSG00000234518	68.3456	4.36555	0.759402	3.64352e-09	1.2741e-07	PTGES3P1	processed_pseudogene
ENSG00000227028	53.8519	3.66668	0.690735	9.02367e-09	3.01245e-07	SLC8A1-AS1	antisense
ENSG00000280650	216.084	1.00817	0.189719	1.03609e-08	3.42095e-07	KCNIP4-IT1	lincRNA
ENSG00000270069	350.786	0.737738	0.141826	3.0898e-08	9.67111e-07	MIR222HG	lincRNA
ENSG00000235545	103.717	1.23733	0.25128	5.86941e-08	1.75331e-06	AC103923.1	antisense
ENSG00000278771	3582.67	1.12353	0.227564	6.74266e-08	1.99145e-06	RN7SL3	misc_RNA
ENSG00000254838	145.352	1.30673	0.271099	1.11551e-07	3.22199e-06	GVINP1	transcribed_unprocessed_pseudogene
ENSG00000267102	31.1768	2.85005	0.612357	1.37927e-07	3.93233e-06	AC060766.1	transcribed_processed_pseudogene
ENSG00000274434	33.2843	-0.0163275	0.315197	3.23172e-07	8.8056e-06	AC142525.1	lincRNA
ENSG00000259905	174.476	0.934695	0.203173	4.08842e-07	1.08881e-05	PWRN1	lincRNA
ENSG00000245571	131.828	2.04274	0.46769	5.45146e-07	1.42603e-05	FAM111A-DT	lincRNA
ENSG00000251441	47.4599	2.25731	0.525734	7.28838e-07	1.85507e-05	RTEL1P1	transcribed_processed_pseudogene
ENSG00000128262	23.5839	3.77233	0.937059	1.974e-06	4.76206e-05	POM121L9P	transcribed_unprocessed_pseudogene
ENSG00000177133	1062.29	-0.589893	0.137641	3.77527e-06	8.66401e-05	LINC00982	antisense
ENSG00000214106	135.697	1.78634	0.460202	5.98793e-06	0.000131433	PAXIP1-AS2	antisense
ENSG00000180769	229.873	-0.847605	0.210733	6.06984e-06	0.000132955	WDFY3-AS2	antisense
ENSG00000285293	16.3864	2.70577	0.706483	6.48963e-06	0.000141232	TBILA	antisense
ENSG00000259495	428.892	0.488234	0.115931	7.21951e-06	0.000155821	AC016705.2	lincRNA
ENSG00000276649	64.5242	0.922216	0.233903	8.62248e-06	0.000184413	AL117335.1	antisense
ENSG00000281197	19.6464	5.74193	2.20774	9.36989e-06	0.000199313	TNFRSF14-AS1	antisense
ENSG00000251194	30.157	1.71478	0.461313	9.81326e-06	0.000208181	AL133330.1	sense_intronic
ENSG00000233369	11583	-0.188034	0.0427904	1.00639e-05	0.000213114	GTF2IP4	transcribed_processed_pseudogene
ENSG00000232229	212.709	0.666848	0.166879	1.11617e-05	0.000233632	LINC00865	lincRNA
ENSG00000237105	62.9667	0.275856	0.547353	1.15803e-05	0.00024111	HCP5	processed_transcript
ENSG00000273270	1061.83	-0.25415	0.0602755	1.41496e-05	0.000291004	AC090114.2	lincRNA
ENSG00000272693	51.2765	3.30688	0.958475	1.95003e-05	0.000388835	AC073107.1	transcribed_unprocessed_pseudogene
ENSG00000214381	25.6668	1.45273	0.405038	2.08508e-05	0.000413317	LINC00488	processed_transcript
ENSG00000235205	11.5128	-3.73331	1.01092	2.18767e-05	0.000432172	TATDN2P3	processed_pseudogene
ENSG00000229023	91.9962	1.49079	0.419608	2.445e-05	0.000475857	AC067945.1	processed_pseudogene
ENSG00000254154	103.868	1.23995	0.368329	4.72277e-05	0.000874398	CRYZL2P-SEC16B	processed_transcript
ENSG00000226476	191.456	-0.657963	0.182009	5.31673e-05	0.000970643	LINC01748	lincRNA
ENSG00000231064	232.446	0.698031	0.19705	5.66028e-05	0.00102542	AC234582.1	antisense
ENSG00000266378	11.4076	3.98774	1.1061	7.6756e-05	0.00134104	AC005224.3	lincRNA
ENSG00000231185	45.0082	2.02939	0.660791	8.68871e-05	0.00149915	SPRY4-AS1	antisense
ENSG00000222328	738.321	-0.998219	0.307801	9.15382e-05	0.00157021	RNU2-2P	snRNA
ENSG00000267302	5.71041	5.23818	2.34032	9.20483e-05	0.00157666	RNFT1-DT	lincRNA
ENSG00000228863	119.177	0.819476	0.246314	9.30196e-05	0.00158983	AL121985.1	antisense
ENSG00000284602	221.851	0.543466	0.155742	0.00010472	0.00177437	AL031432.4	bidirectional_promoter_lncRNA
ENSG00000250011	18.3843	4.76442	2.17773	0.000125027	0.00208105	HMGB1P3	processed_pseudogene
ENSG00000248668	12.8867	-0.137721	0.361506	0.000125459	0.00208676	OXCT1-AS1	processed_transcript
ENSG00000202198	36.0565	0.0157766	0.314984	0.000145303	0.0023602	RF00100	misc_RNA
ENSG00000279277	230.685	0.659916	0.200302	0.000161028	0.00257132	AC012020.1	processed_transcript
ENSG00000269609	422.525	0.368561	0.104218	0.000170637	0.00269554	RPARP-AS1	processed_transcript
ENSG00000241634	35.9083	-1.0905	0.362411	0.000175448	0.00276228	AC069499.1	processed_pseudogene
ENSG00000272491	26.1789	1.53267	0.522787	0.000183401	0.00286833	AL109659.2	antisense
ENSG00000237372	8.54587	3.58863	1.25259	0.000208907	0.00320973	AL606807.1	lincRNA
ENSG00000224153	35.7902	0.885989	0.294835	0.000263932	0.00394344	LINC02054	lincRNA
ENSG00000224666	5.45294	0.380049	0.871632	0.000278436	0.00411698	Z84484.1	antisense
ENSG00000258354	14.6033	-0.120891	0.350212	0.000305284	0.00446631	AC138932.2	lincRNA
ENSG00000232433	36.341	-1.14699	0.406384	0.000319126	0.0046429	GXYLT1P3	processed_pseudogene
ENSG00000250195	8.8703	5.12984	2.13232	0.000319458	0.00464485	AC109927.1	antisense
ENSG00000249740	24.9881	1.48501	0.546018	0.000326573	0.00473661	OSMR-AS1	lincRNA
ENSG00000259370	22.4292	1.61905	0.599913	0.000339178	0.00488935	AC103740.1	antisense
ENSG00000226237	33.0661	0.918305	0.324022	0.00041414	0.0058239	GAS1RR	lincRNA
ENSG00000226053	15.6962	1.40029	0.523083	0.000428574	0.00599686	LINC01776	lincRNA
ENSG00000243753	82.5498	1.85727	0.753787	0.0004623	0.00638309	HLA-L	transcribed_unprocessed_pseudogene
ENSG00000244131	26.2891	-1.18407	0.449888	0.000492409	0.00672531	RPSAP51	processed_pseudogene
ENSG00000251442	25.5364	4.04537	1.80693	0.000492507	0.00672531	LINC01094	lincRNA
ENSG00000253522	7.48434	4.97198	2.02847	0.000504531	0.0068696	MIR3142HG	lincRNA
ENSG00000232097	17.8508	1.9663	0.796584	0.000528648	0.00714023	AC079781.3	processed_pseudogene
ENSG00000272463	21.0354	3.61289	1.34497	0.000538605	0.00724979	AL357054.4	lincRNA
ENSG00000231969	21.4508	-1.06691	0.40915	0.000619499	0.00820279	AC007364.1	antisense
ENSG00000269837	776.436	-1.09431	0.428916	0.000620708	0.00821418	IPO5P1	transcribed_processed_pseudogene
ENSG00000274020	161.927	0.62894	0.219389	0.000697251	0.00909198	LINC01138	processed_transcript
ENSG00000254708	67.8147	0.949257	0.36632	0.000704366	0.00916931	AL139174.1	processed_pseudogene
ENSG00000223745	319.645	0.754492	0.276439	0.000712582	0.00925335	CCDC18-AS1	processed_transcript
ENSG00000227036	1016.43	0.491704	0.164101	0.000737147	0.00954605	LINC00511	processed_transcript
ENSG00000272888	3911.68	-0.182361	0.0553101	0.000787658	0.0101113	LINC01578	processed_transcript
ENSG00000227640	366.877	0.457577	0.153199	0.000845034	0.0107425	SOX21-AS1	lincRNA
ENSG00000251348	137.215	-0.504698	0.173376	0.000879651	0.0111286	HSPD1P11	processed_pseudogene
ENSG00000205861	5.84905	0.136323	0.359321	0.000936328	0.0117572	PCOTH	processed_transcript
ENSG00000264176	8.22399	2.24834	0.936296	0.00101142	0.0125757	MAGOH2P	transcribed_processed_pseudogene
ENSG00000235653	14.2206	3.09232	1.14696	0.00101598	0.0126229	AC007253.1	processed_pseudogene
ENSG00000233621	33.8234	1.35283	0.590858	0.0010174	0.0126273	LINC01137	antisense
ENSG00000286116	21.2798	1.4465	0.647698	0.00105989	0.0130926	AL157394.2	antisense
ENSG00000240240	375.587	-0.426323	0.145628	0.00115336	0.0140624	BX664727.3	processed_transcript
ENSG00000234257	12.1985	-1.70049	0.806219	0.0011722	0.0142704	SOD2P1	processed_pseudogene
ENSG00000243650	6.17982	3.63932	2.2901	0.00119017	0.0144668	RN7SL834P	misc_RNA
ENSG00000186960	3170.12	-0.266438	0.0857509	0.00126294	0.0152334	LINC01551	lincRNA
ENSG00000249383	33.2503	0.9778	0.409864	0.00128706	0.0154611	LINC02071	lincRNA
ENSG00000266680	8.61928	1.72681	0.793863	0.00129876	0.0155858	AL135905.1	antisense
ENSG00000233030	51.6929	1.11229	0.482318	0.00131048	0.0156865	AC243772.2	antisense
ENSG00000189238	15.9986	-2.36173	1.25004	0.00134172	0.0160279	LINC00943	lincRNA
ENSG00000239213	92.1537	-0.640643	0.244309	0.00135715	0.01618	NCK1-DT	antisense
ENSG00000275192	8.92473	-0.120698	0.349392	0.00140649	0.0166665	LINC02197	processed_transcript
ENSG00000206585	1661.61	-1.25507	0.593533	0.00148508	0.0174486	RNVU1-7	snRNA
ENSG00000220890	13.2882	-1.63415	0.805334	0.00153004	0.0179144	HCG27	processed_transcript
ENSG00000214135	904.224	-0.239649	0.078116	0.00157213	0.0183071	AC132008.2	transcribed_unprocessed_pseudogene
ENSG00000274266	113.49	-0.976011	0.441447	0.00175259	0.0201105	SNORA73A	snoRNA
ENSG00000249859	128.092	0.783224	0.333533	0.0018711	0.0212735	PVT1	lincRNA
ENSG00000263327	176.69	0.559375	0.217708	0.00197829	0.0223414	TAPT1-AS1	antisense
ENSG00000229618	24.5286	1.10981	0.533292	0.00199025	0.0224549	AC011287.1	lincRNA
ENSG00000002079	8.5485	3.74134	2.20036	0.0020356	0.0228789	MYH16	transcribed_unitary_pseudogene
ENSG00000124835	12.1561	1.70558	0.879375	0.00208099	0.0233112	AC105760.1	antisense
ENSG00000282598	7.50512	0.102289	0.339181	0.00211126	0.0235942	AC138374.2	antisense
ENSG00000260852	254.752	-0.309163	0.107427	0.00212091	0.0236796	FBXL19-AS1	antisense
ENSG00000226025	1468.62	0.213274	0.426564	0.00215619	0.024028	AC005515.1	transcribed_unprocessed_pseudogene
ENSG00000231784	60.8709	1.23195	0.63243	0.00224794	0.0248612	DBIL5P	transcribed_unitary_pseudogene
ENSG00000239268	204.576	-0.551875	0.217668	0.00227694	0.0250772	AC092691.1	lincRNA
ENSG00000277511	41.5697	1.02814	0.485312	0.00229508	0.0252416	AC116407.2	lincRNA
ENSG00000231007	6.42293	2.33359	1.30211	0.00238452	0.0260188	CDC20P1	processed_pseudogene
ENSG00000283122	168.036	0.604876	0.247633	0.00239201	0.0260644	HYMAI	sense_overlapping
ENSG00000259479	332.249	-0.504906	0.196947	0.00240032	0.0261428	SORD2P	transcribed_unprocessed_pseudogene
ENSG00000240498	422.812	0.497138	0.19322	0.00246878	0.0267648	CDKN2B-AS1	antisense
ENSG00000212743	167.7	0.502501	0.196481	0.00252654	0.02724	LINC02656	lincRNA
ENSG00000260422	12.2396	1.71251	0.967743	0.00258528	0.027747	Z97205.2	lincRNA
ENSG00000197934	8.06028	-2.09543	1.33865	0.0026361	0.0281177	CYYR1-AS1	antisense
ENSG00000229950	18.2759	1.95432	1.08912	0.00264994	0.0282048	TFAP2A-AS1	antisense
ENSG00000272405	15.0568	1.31255	0.707301	0.00267066	0.0283535	AL365181.3	antisense
ENSG00000267383	442.515	-0.295132	0.106116	0.00304308	0.0316097	AC011447.3	antisense
ENSG00000248697	9.80904	2.08986	1.33004	0.00307635	0.0318947	TOX4P1	processed_pseudogene
ENSG00000261971	259.463	0.453642	0.177358	0.0030803	0.0319026	MMP25-AS1	antisense
ENSG00000234380	36.1307	0.939722	0.470065	0.00309564	0.0319733	LINC01426	lincRNA
ENSG00000283341	67.2923	-1.19488	0.695031	0.00311626	0.0321713	AC068205.2	processed_transcript
ENSG00000261823	10.387	-1.35764	0.791067	0.00314306	0.0323771	AC084782.2	lincRNA
ENSG00000233264	215.564	-0.415605	0.159526	0.00315478	0.0324732	AC006042.3	processed_pseudogene
ENSG00000267547	18.9494	1.15297	0.619147	0.00322609	0.0329766	AC060766.4	lincRNA
ENSG00000285550	6.39986	0.173615	0.38585	0.00332784	0.0338515	AC110014.1	lincRNA
ENSG00000251136	315.694	0.508345	0.207565	0.00344055	0.0348476	AF117829.1	lincRNA
ENSG00000232721	36.309	0.956152	0.499716	0.00346726	0.0350128	AC239800.2	lincRNA
ENSG00000212643	36.2442	0.0490292	0.320084	0.00363909	0.0365444	ZRSR2P1	transcribed_processed_pseudogene
ENSG00000273189	5.06785	0.302803	0.570422	0.00364078	0.0365458	AC010619.2	processed_transcript
ENSG00000255182	69.6549	-0.928267	0.495706	0.00368121	0.0368731	AC084125.2	processed_transcript
ENSG00000266554	17.6571	1.26073	0.764944	0.00372884	0.0372868	LINC01443	lincRNA
ENSG00000267886	116.115	-0.439453	0.176188	0.00381747	0.0379798	AC074135.1	lincRNA
ENSG00000272419	78.3899	0.848198	0.434232	0.00382377	0.0380248	LINC01145	transcribed_unprocessed_pseudogene
ENSG00000272734	65.0317	0.734015	0.352484	0.00383442	0.038084	ADIRF-AS1	processed_transcript
ENSG00000229816	193.858	0.455932	0.185926	0.00399427	0.0394555	DDX50P1	processed_pseudogene
ENSG00000277050	6.80697	1.50834	0.944407	0.0042135	0.0412066	AL122125.1	antisense
ENSG00000204789	449.044	0.313979	0.11879	0.00429251	0.0418536	ZNF204P	processed_pseudogene
ENSG00000275638	17.1299	-0.866135	0.472174	0.00447224	0.043377	AC011939.3	antisense
ENSG00000271522	27.3455	1.23124	0.799385	0.00449219	0.0435526	AC016831.6	lincRNA
ENSG00000179523	158.987	0.853585	0.462545	0.00451695	0.0437034	EIF3J-DT	lincRNA
ENSG00000238045	68.2684	0.961796	0.558643	0.00451702	0.0437034	AC009133.1	antisense
ENSG00000228526	482.534	0.3165	0.121123	0.00454302	0.043901	MIR34AHG	lincRNA
ENSG00000111788	129.019	-0.428502	0.175837	0.00461141	0.0443907	AC009533.1	unprocessed_pseudogene
ENSG00000232528	15.8549	1.44773	1.12611	0.00461769	0.0444222	AL109809.1	transcribed_unitary_pseudogene
ENSG00000187953	690.22	-0.388623	0.155478	0.00468926	0.0449663	PMS2CL	transcribed_unprocessed_pseudogene
ENSG00000204241	66.9585	0.648233	0.310064	0.00476921	0.0455083	AP000911.1	lincRNA
ENSG00000174028	272.9	-0.810032	0.43244	0.00481326	0.0458544	FAM3C2	processed_pseudogene
ENSG00000230082	12.0769	1.24692	0.770669	0.00484298	0.0461117	PRRT3-AS1	antisense
ENSG00000212232	656.655	-0.620776	0.2939	0.004907	0.0465968	SNORD17	snoRNA
ENSG00000245556	139.032	0.58477	0.271716	0.00515204	0.0486103	SCAMP1-AS1	lincRNA
ENSG00000237512	5.52015	0.167465	0.382402	0.005195	0.0489177	UNC5B-AS1	antisense
ENSG00000184441	105.971	0.610082	0.289872	0.00521892	0.0490645	AP001062.1	antisense
ENSG00000228490	6.08997	2.46146	1.54184	0.00527069	0.0494526	CT009496.1	unprocessed_pseudogene
ENSG00000263551	121.05	-0.487938	0.211748	0.0052916	0.0495895	AP005328.1	lincRNA
ENSG00000197083	536.058	-0.282794	0.107986	0.00535084	0.0499767	ZNF300P1	transcribed_unprocessed_pseudogene
